# Supplementary material for: Electrochemically promoted selenocyclization for the synthesis of organoselenyl isoxazoles
Source: Royal Society of Chemistry journal article supplement (doi:10.1039/d4gc03547j), 2024-01-01
Supplement: d4gc03547j1.pdf [file d4gc03547j1.pdf]

## Supporting Information

### Electrochemically promoted selenocyclization for the synthesis of organoselenyl isoxazoles

Nan Sun,\* Zhi Qiao, Jiamin, Li, Jiazhi, Gu, Liqun Jin, and Xinquan Hu\*

*College of Chemical Engineering, Zhejiang University of Technology, Hangzhou 310032, Hangzhou  
310032, People's Republic of China*

*E-mail: [sunnan@zjut.edu.cn](mailto:sunnan@zjut.edu.cn) and [xinquan@zjut.edu.cn](mailto:xinquan@zjut.edu.cn)*

#### Table of Contents

|                                                                                                       |      |
|-------------------------------------------------------------------------------------------------------|------|
| 1. General Remarks.....                                                                               | S-2  |
| 2. Gram-Scale Synthesis.....                                                                          | S-2  |
| 3. Mechanism Studies.....                                                                             | S-3  |
| 4. Characterization Data for all Synthesized 4-Organoselenyl Isoxazoles.....                          | S-7  |
| 5. References.....                                                                                    | S-26 |
| 6. <sup>1</sup> H, <sup>13</sup> C, <sup>77</sup> Se and <sup>19</sup> F NMR Spectra of Products..... | S-27 |

## 1. General Remarks

The  $^1\text{H}$ ,  $^{13}\text{C}$ ,  $^{77}\text{Se}$  and  $^{19}\text{F}$  NMR analyses were performed on a Bruker AVANCE III 500 MHz spectrometer in deuterated solvents.  $^1\text{H}$ , and  $^{13}\text{C}$  NMR spectra were recorded with tetramethylsilane (TMS) as internal standard. The  $^{77}\text{Se}$  NMR spectra were recorded with diphenyl diselenide ( $\delta = 461$  ppm) as external standard. The  $^{19}\text{F}$  NMR spectra were recorded with  $\text{CFCl}_3$  ( $\delta = 0$  ppm) as external standard. Low-resolution mass analyses were performed on a Thermo Scientific TRACE ISQ GC-MS instrument in EI mode (70 eV). High resolution mass analyses were performed on an Agilent 6545 LC/Q-TOF mass spectrometer in positive ESI mode. Melting points (uncorrected) were determined on a BUCHI M-565 apparatus. Gas chromatography (GC) analyses were performed on a Shimadzu GC-2010 Plus instrument with FID detector using an Agilent J&W DB-5 capillary column (30 m x 0.32 mm (i.d.), 0.25  $\mu\text{m}$ ).

Electrochemical reactions were conducted using a GWINSTEK GPD-3303S DC power supply in constant current mode using undivided cell equipped with a platinum plate (10 mm x 8 mm x 1 mm) as the anode and a graphite rod ( $\varphi = 6$  mm) as the cathode under air. Cyclic voltammograms were recorded on a Chenhua CHI 660E Instruments.

Reagents and solvents were purchased as reagent grade and were directly used without further purification. The reactants 2-alkyn-1-one *o*-methyloximes **1** and diorganyl diselenides **2** were prepared according to literature methods.<sup>[1-4]</sup> Flash column chromatography were performed on silica gel (200-300 mesh) with petroleum ether/ethyl acetate as eluents.

## 2. Gram-Scale Synthesis

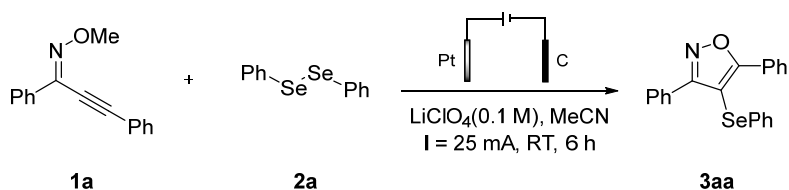

To a 100 mL of undivided three-necked bottle were charged with (*Z*)-1,3-diphenylprop-2-yn-1-one *O*-methyl oxime **1a** (1.18 g, 5.0 mmol), diphenyl diselenide **2a** (1.56 g, 5.0 mmol), LiClO<sub>4</sub> (1.06 g, 10.0 mmol) and 100 mL of CH<sub>3</sub>CN. The bottle was equipped with a platinum plate (10 mm x 8 mm x 0.1 mm) as the anode and a graphite rod ( $\Phi = 6$  mm) as the cathode. The reaction mixture was stirred and electrolyzed at a constant current of 25 mA at room temperature for 6 h until complete consumption of **1a** as monitored by GC analysis. Then, the reaction mixture was concentrated under reduced pressure to remove solvent CH<sub>3</sub>CN. The resulted solid was re-dissolved in 30 mL of EtOAc, followed by successively washing with water twice, drying over anhydrous Na<sub>2</sub>SO<sub>4</sub> and concentrating under a vacuum. The residual was purified by column chromatography on silica gel with a 75 : 1 mixture of petroleum ether and ethyl acetate as eluent. Finally, 1.80 g of **3aa** was obtained as white solid in 96% yield.

### 3. Mechanism Studies

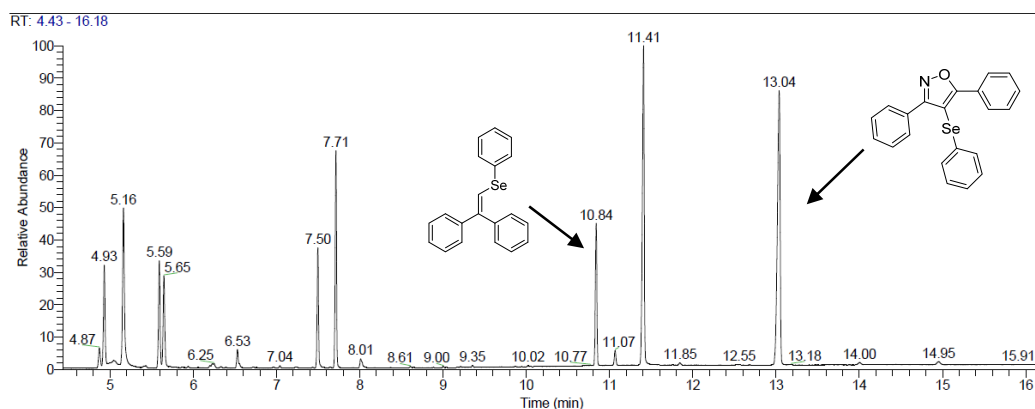

**Figure S1** GC-MS chromatogram of the reaction mixture of (*Z*)-1,3-diphenylprop-2-yn-1-one *O*-methyloxime (**1a**), diphenyl diselenide (**2a**) in the presence of 1,1-diphenylethylene

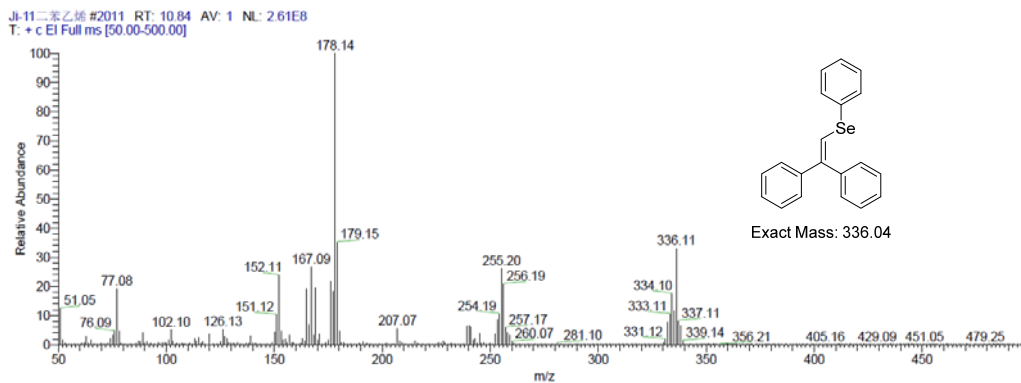

Figure S2 MS spectrum of the peak at 10.84 min

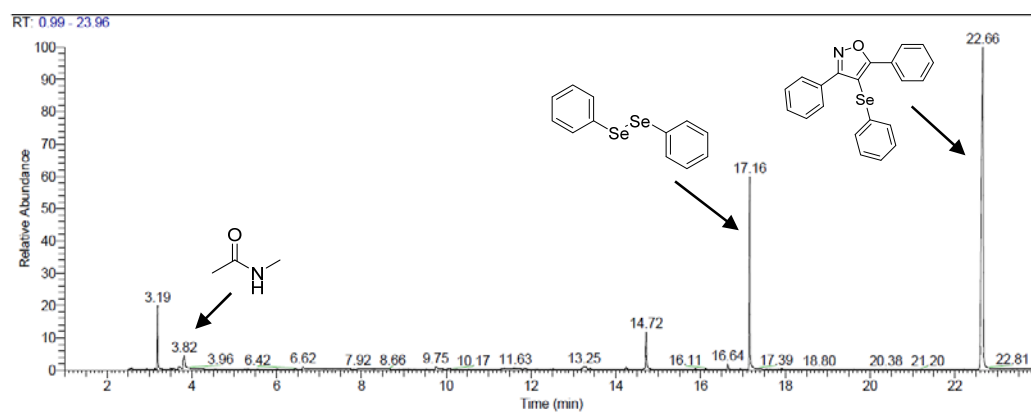

Figure S3 GC-MS chromatogram of the reaction mixture of (*Z*)-1,3-diphenylprop-2-yn-1-one *O*-methyloxime (**1a**) and diphenyl diselenide (**2a**)

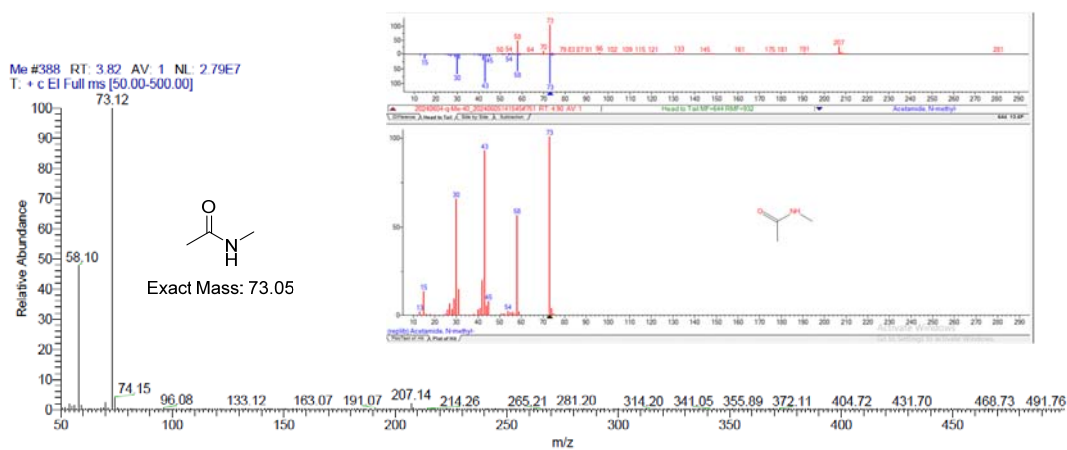

Figure S4 MS spectrum of the peak at 3.82 min

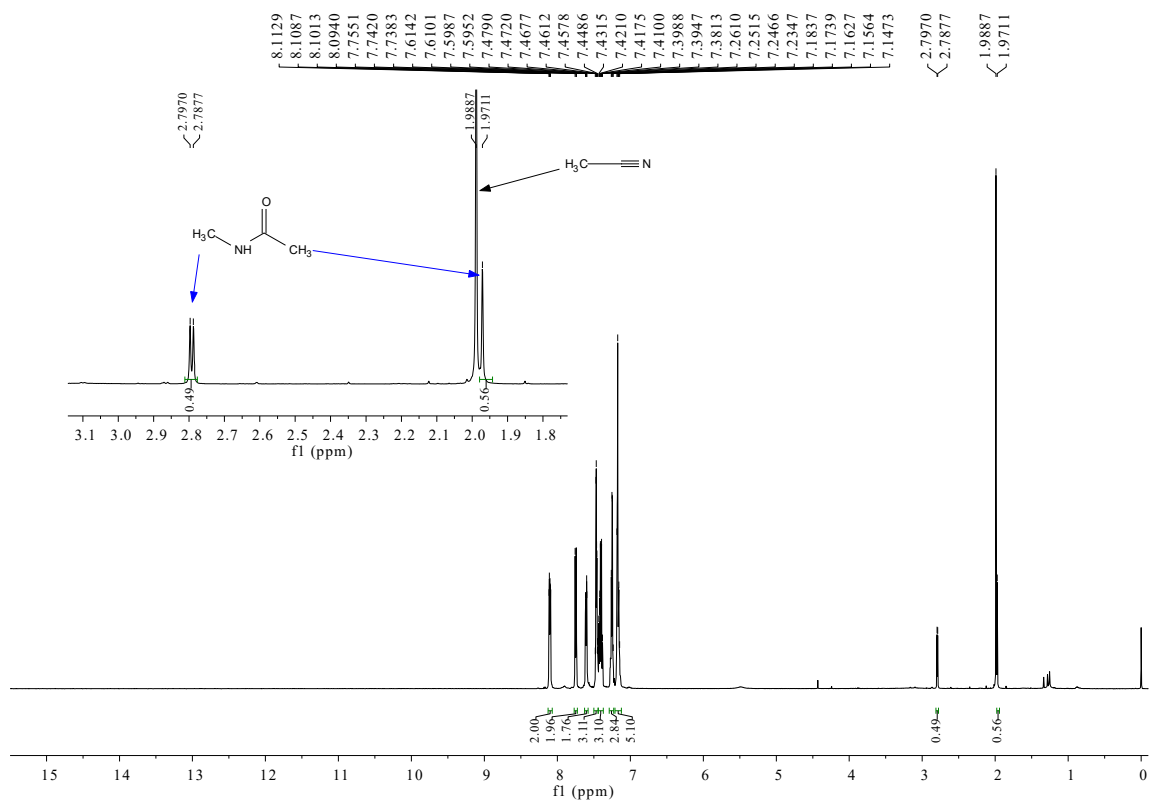

**Figure S5**  $^1\text{H}$  NMR spectrum of reaction mixture of (*Z*)-1,3-diphenylprop-2-yn-1-one *O*-methyloxime (**1a**) and diphenyl diselenide (**2a**) after removing most of the  $\text{CH}_3\text{CN}$  solvent

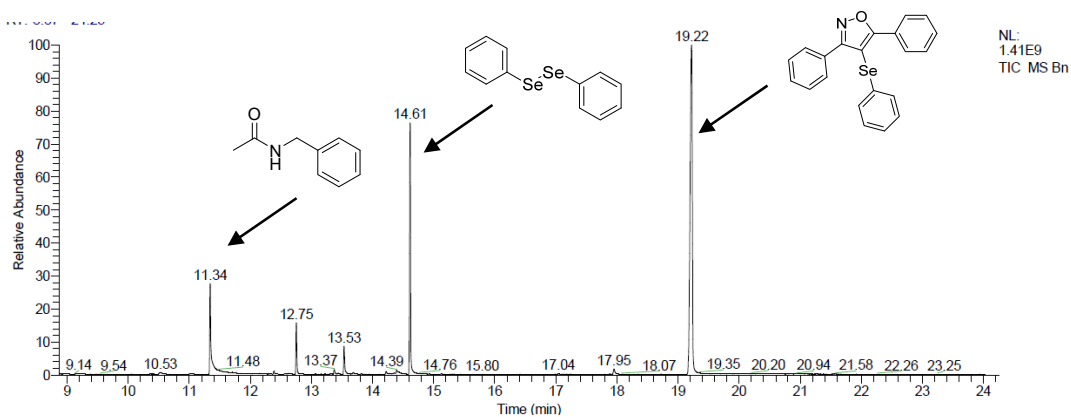

**Figure S6** GC-MS chromatogram of the reaction mixture of (*Z*)-1,3-diphenylprop-2-yn-1-one *O*-benzyloxime (**4**) and diphenyl diselenide (**2a**)

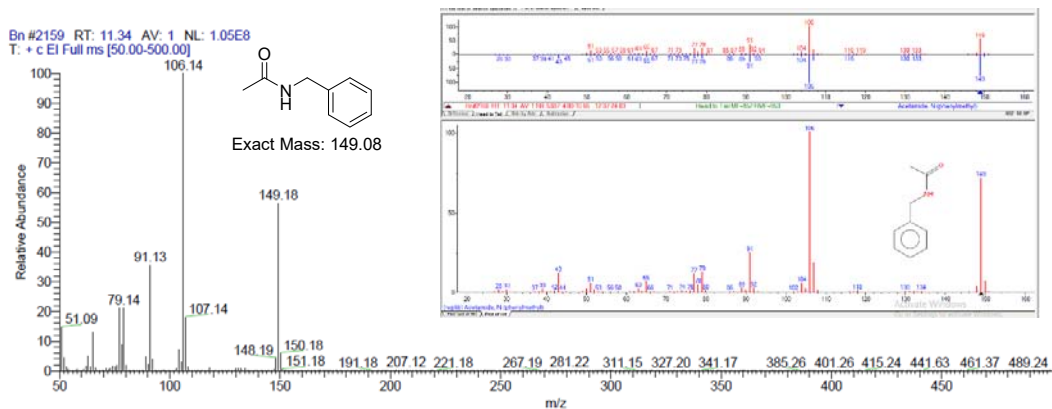

**Figure S7** MS spectrum of the peak at 11.34 min

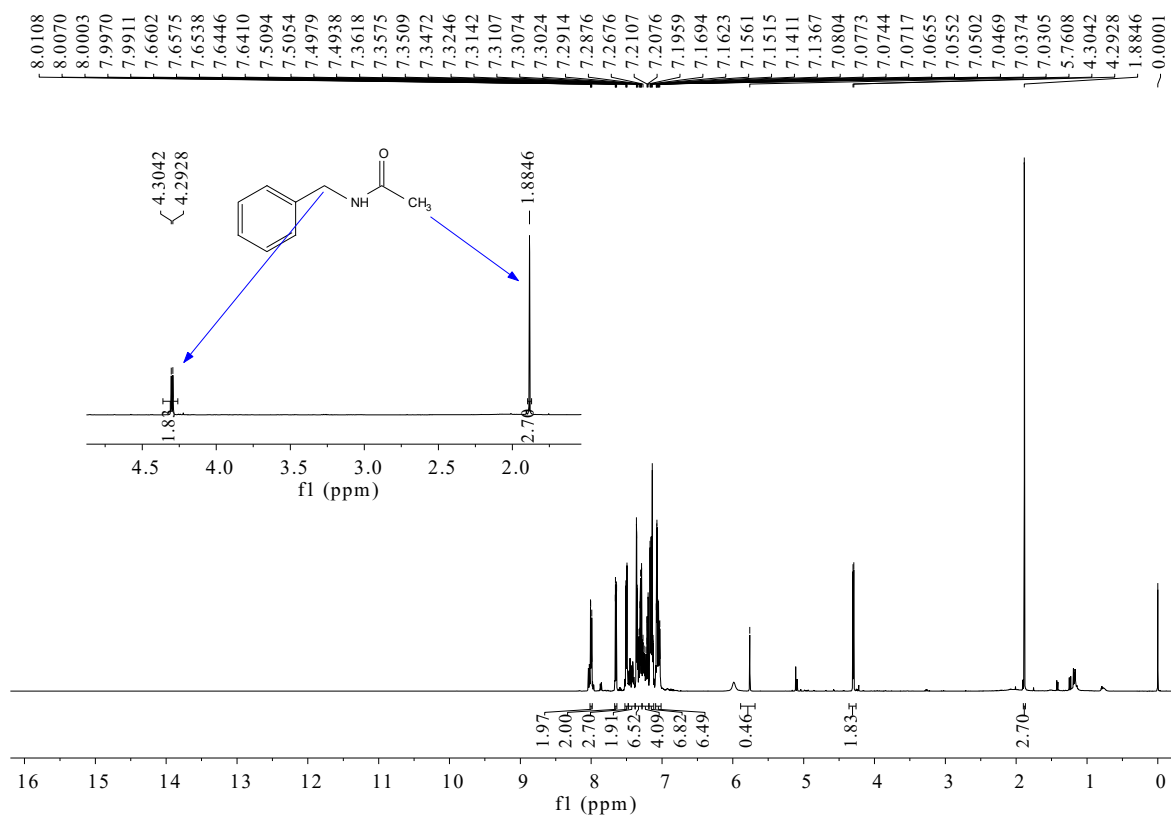

**Figure S8**  $^1\text{H}$  NMR spectrum of reaction mixture of (*Z*)-1,3-diphenylprop-2-yn-1-one *O*-benzyloxime (**4**) and diphenyl diselenide (**2a**) after removing the  $\text{CH}_3\text{CN}$  solvent

#### 4. Characterization Data for all Synthesized 4-Organoselenyl Isoxazoles

**Note:** The synthesized 4-organoselenyl isoxazoles, including **3ad**, **3ag**, **3ai**, **3aj**, **3ak**, **3am**, **3ap**, **3aq**, **3at**, **3ga**, **3la**, **3ma**, **3pa**, **3qa**, **3ra**, **3ta** and **6**, in this paper are new compounds.

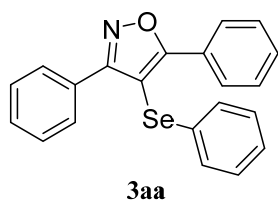

**3,5-Diphenyl-4-(phenylselenyl)isoxazole (3aa)** (CAS No.: 870127-46-1): Flash column chromatography eluent (petroleum ether/ethyl acetate = 75:1); Yield: 99% (187 mg); White solid; M.p.: 102-104 °C (lit.<sup>[5]</sup> M.p.: 100-102 °C). <sup>1</sup>H NMR (CDCl<sub>3</sub>, 500 MHz):  $\delta$  = 8.06-7.94 (m, 2H), 7.65 (d,  $J$  = 7.3 Hz, 2H), 7.36-7.31 (m, 3H), 7.31-7.23 (m, 3H), 7.11-7.00 (m, 5H) ppm; <sup>13</sup>C NMR (CDCl<sub>3</sub>, 125 MHz):  $\delta$  = 172.53, 165.86, 131.69, 130.88, 129.93, 129.62, 128.92, 128.84, 128.78, 128.48, 127.95, 127.45, 126.68, 96.44 ppm; <sup>77</sup>Se NMR (CDCl<sub>3</sub>, 95.5 MHz):  $\delta$  = 236.77 ppm. GC-MS (EI) m/z: 377 (M<sup>+</sup>, 6%), 375 (3), 105 (100).

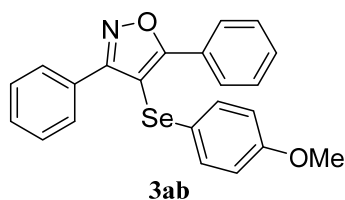

**4-((4-Methoxyphenyl)selenyl)-3,5-diphenylisoxazole (3ab)** (CAS No.: 2487302-10-1): Flash column chromatography eluent (petroleum ether/ethyl acetate = 30:1); Yield: 94% (190 mg); White solid; M.p.: 104-106 °C (lit.<sup>[5]</sup> M.p.: 102-104 °C). <sup>1</sup>H NMR (CDCl<sub>3</sub>, 500 MHz):  $\delta$  = 8.20-8.11 (m, 2H), 7.83-7.70 (m, 2H), 7.53-7.40 (m, 6H), 7.14-7.07 (m, 2H), 6.74-6.67 (m, 2H), 3.72 (s, 3H) ppm; <sup>13</sup>C NMR (CDCl<sub>3</sub>, 125 MHz):  $\delta$  = 170.76, 164.65, 157.93, 130.49, 129.65, 128.74, 127.91, 127.83, 127.64, 127.33, 126.89, 126.48, 120.15, 114.13, 96.73, 54.20 ppm; <sup>77</sup>Se NMR (CDCl<sub>3</sub>, 95.5 MHz):  $\delta$  = 222.57 ppm. GC-MS (EI) m/z: 407 (M<sup>+</sup>, 16%), 405 (8), 105 (100).

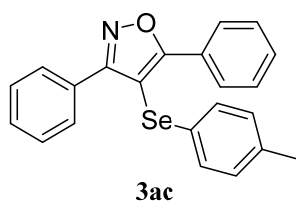

**3,5-Diphenyl-4-(p-tolylselenyl)isoxazole (3ac)** (CAS No.: 1422017-97-7): Flash column chromatography eluent (petroleum ether/ethyl acetate = 75:1); Yield: 98% (191 mg); White solid; M.p.: 108-110 °C (lit.<sup>[6]</sup> M.p.: 112-113 °C). <sup>1</sup>H NMR (CDCl<sub>3</sub>, 500 MHz):  $\delta$  = 8.22-8.16 (m, 2H), 7.89-7.82 (m, 2H), 7.52-7.43 (m, 6H), 7.17-7.11 (m, 2H), 7.03 (d,  $J$  = 8.0 Hz, 2H), 2.28 (s, 3H) ppm; <sup>13</sup>C NMR (CDCl<sub>3</sub>, 125 MHz):  $\delta$  = 172.38, 165.86, 136.66, 130.83, 130.44, 129.91, 129.10, 128.99, 128.93, 128.78, 128.48, 127.98, 127.87, 127.56, 96.82, 21.04 ppm; <sup>77</sup>Se NMR (CDCl<sub>3</sub>, 95.5 MHz):  $\delta$  = 229.46 ppm. GC-MS (EI) m/z: 391 (M<sup>+</sup>, 14%), 389 (7), 105 (100).

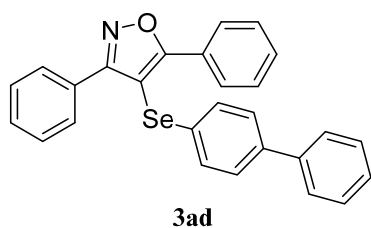

**4-((1,1'-Biphenyl)-4-ylselenyl)-3,5-diphenylisoxazole (3ad)**: Flash column chromatography eluent (petroleum ether/ethyl acetate = 30:1); Yield: 89% (202 mg); Yellow solid; M.p.: 133-135 °C. <sup>1</sup>H NMR (CDCl<sub>3</sub>, 500 MHz):  $\delta$  = 8.07-8.02 (m, 2H), 7.72-7.67 (m, 2H), 7.43-7.37 (m, 5H), 7.36-7.29 (m, 7H), 7.25-7.21 (m, 1H), 7.18-7.13 (m, 2H) ppm; <sup>13</sup>C NMR (CDCl<sub>3</sub>, 125 MHz):  $\delta$  = 172.54, 165.84, 140.16, 139.66, 130.87, 130.63, 129.92, 129.24, 128.91, 128.87, 128.77, 128.47, 128.19, 127.95, 127.51, 127.43, 126.85, 96.36 ppm; <sup>77</sup>Se NMR (CDCl<sub>3</sub>, 95.5 MHz):  $\delta$  = 234.26 ppm. HRMS (+ESI) m/z: [M+H<sup>+</sup>] calculated for C<sub>27</sub>H<sub>20</sub>NOSe<sup>+</sup> 454.0705, found 454.0705.



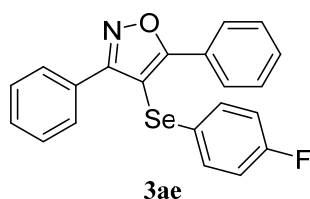

**4-((4-Fluorophenyl)selenyl)-3,5-diphenylisoxazole (3ae)** (CAS No.: 1422017-94-4): Flash column chromatography eluent (petroleum ether/ethyl acetate = 50:1); Yield: 96% (189 mg); White solid; M.p.: 125-127 °C (lit.<sup>[6]</sup> M.p.: 114-115 °C). <sup>1</sup>H NMR (CDCl<sub>3</sub>, 500 MHz):  $\delta$  = 8.14-8.09 (m, 2H), 7.79-7.71 (m, 2H), 7.52-7.40 (m, 6H), 7.13 (m, 7.16-7.09, 2H), 6.90-6.83 (m, 2H) ppm; <sup>13</sup>C NMR (CDCl<sub>3</sub>, 125 MHz):  $\delta$  = 171.03, 164.52, 160.95 (d,  $J_{CF}$  = 246.3 Hz), 130.30 (d,  $J_{CF}$  = 8.0 Hz), 129.80, 128.85, 127.78, 127.69, 127.62, 127.38, 126.82, 126.26, 124.61 (d,  $J_{CF}$  = 3.5 Hz), 115.59 (d,  $J_{CF}$  = 21.9 Hz), 96.03 ppm; <sup>77</sup>Se NMR (CDCl<sub>3</sub>, 95.5 MHz):  $\delta$  = 233.01 ppm; <sup>19</sup>F NMR (CDCl<sub>3</sub>, 470 MHz)  $\delta$  = -114.93 ppm. GC-MS (EI) m/z: 395 (M<sup>+</sup>, 12%), 393 (6), 123 (100).

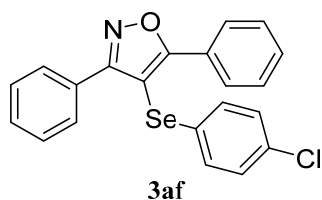

**4-((4-Chlorophenyl)selenyl)-3,5-diphenylisoxazole (3af)** (CAS No.: 1422017-95-5): Flash column chromatography eluent (petroleum ether/ethyl acetate = 25:1); Yield: 99% (203 mg); White solid; M.p.: 134-138 °C (lit.<sup>[5]</sup> M.p.: 132-134 °C). <sup>1</sup>H NMR (CDCl<sub>3</sub>, 500 MHz):  $\delta$  = 8.16-8.10 (m, 2H), 7.83-7.77 (m, 2H), 7.51-7.41 (m, 6H), 7.17-7.10 (m, 4H) ppm; <sup>13</sup>C NMR (CDCl<sub>3</sub>, 125 MHz):  $\delta$  = 172.54, 165.65, 132.87, 131.02, 130.24, 130.05, 129.79, 129.72, 128.86, 128.66, 128.56, 127.92, 127.29, 96.26 ppm; <sup>77</sup>Se NMR (CDCl<sub>3</sub>, 95.5 MHz):  $\delta$  = 238.22 ppm. GC-MS (EI) m/z: 411 (M<sup>+</sup>, 3%), 309 (2), 105 (100).

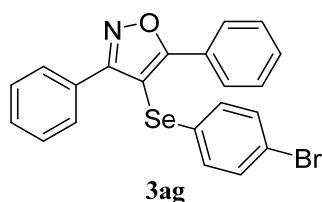

**4-((4-Bromophenyl)selenyl)-3,5-diphenylisoxazole (3ag):** Flash column chromatography eluent (petroleum ether/ethyl acetate = 20:1); Yield: 91% (208 mg); White solid; M.p.: 144-147 °C. <sup>1</sup>H NMR (CDCl<sub>3</sub>, 500 MHz): δ = 8.11-8.06 (m, 2H), 7.77-7.71 (m, 2H), 7.51-7.40 (m, 6H), 7.31-7.27 (m, 2H), 7.06-7.01 (m, 2H) ppm; <sup>13</sup>C NMR (CDCl<sub>3</sub>, 125 MHz): δ = 172.58, 165.64, 132.58, 130.99, 130.50, 130.44, 130.00, 128.81, 128.60, 128.51, 127.89, 127.25, 120.77, 96.07 ppm; <sup>77</sup>Se NMR (CDCl<sub>3</sub>, 95.5 MHz): δ = 238.79 ppm. HRMS (+ESI) m/z: [M + H<sup>+</sup>] calculated for C<sub>21</sub>H<sub>15</sub>BrNOSe<sup>+</sup> 455.9497, found 455.9493.

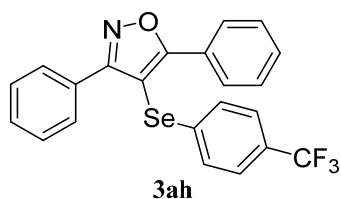

**3,5-Diphenyl-4-((4-(trifluoromethyl)phenyl)selenyl)isoxazole (3ah)** (CAS No.: 2487302-13-4): Flash column chromatography eluent (petroleum ether/ethyl acetate = 25:1); Yield: 83% (185 mg); White solid; M.p.: 152-154 °C (lit.<sup>[7]</sup> M.p.: 101-103 °C). <sup>1</sup>H NMR (CDCl<sub>3</sub>, 500 MHz): δ = 8.11-8.05 (m, 2H), 7.79-7.73 (m, 2H), 7.51-7.40 (m, 8H), 7.29 (d, *J* = 8.2 Hz, 2H) ppm; <sup>13</sup>C NMR (CDCl<sub>3</sub>, 125 MHz): δ = 172.94, 165.65, 136.92, 131.11, 130.08, 128.85, 128.82 (q, *J*<sub>CF</sub> = 32.5 Hz), 128.74, 128.55, 128.47, 128.42, 127.85, 127.13, 126.29 (q, *J*<sub>CF</sub> = 3.7 Hz), 123.99 (q, *J*<sub>CF</sub> = 271.7 Hz), 95.29 ppm; <sup>77</sup>Se NMR (CDCl<sub>3</sub>, 95.5 MHz): δ = 250.00 ppm; <sup>19</sup>F NMR (470 MHz, CDCl<sub>3</sub>) δ = -62.55 ppm. GC-MS (EI) m/z: 445 (M<sup>+</sup>, 8%), 443 (4), 105 (100).

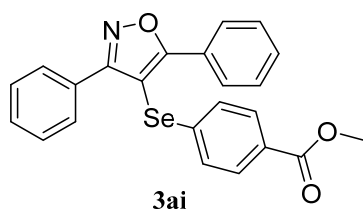

**Methyl 4-((3,5-diphenylisoxazol-4-yl)selenyl)benzoate (3ai):** Flash column chromatography eluent (petroleum ether/ethyl acetate = 25:1); Yield: 87% (190 mg); White solid; M.p.: 161-163 °C. <sup>1</sup>H NMR (CDCl<sub>3</sub>, 500 MHz): δ = 7.99-7.93 (m, 2H), 7.77-7.72 (m, 2H), 7.66-7.60 (m, 2H), 7.38-7.27 (m, 6H), 7.16-7.12 (m, 2H), 3.76 (s, 3H) ppm; <sup>13</sup>C NMR (CDCl<sub>3</sub>, 125 MHz): δ = 172.96, 166.56, 165.70, 138.67, 131.05, 130.52, 130.04, 128.82, 128.73, 128.51, 128.38, 127.85, 127.15, 95.28, 52.13 ppm; <sup>77</sup>Se NMR (CDCl<sub>3</sub>, 95.5 MHz): δ = 252.41 ppm. HRMS (+ESI) m/z: [M + H<sup>+</sup>] calculated for C<sub>23</sub>H<sub>18</sub>NO<sub>3</sub>Se<sup>+</sup> 436.0447, found 436.0432.

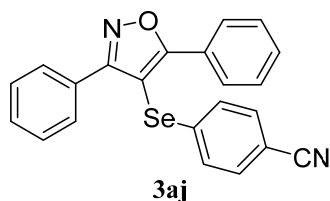

**4-((3,5-Diphenylisoxazol-4-yl)selenyl)benzonitrile (3aj):** Flash column chromatography eluent (petroleum ether/ethyl acetate = 10:1); Yield: 95% (191 mg); White solid; M.p.: 159-162 °C. <sup>1</sup>H NMR (CDCl<sub>3</sub>, 500 MHz): δ = 8.07-8.03 (m, 1H), 7.76-7.71 (m, 1H), 7.52-7.40 (m, 4H), 7.29-7.26 (m, 1H) ppm; <sup>13</sup>C NMR (CDCl<sub>3</sub>, 125 MHz): δ = 173.09, 165.50, 139.15, 132.78, 131.24, 130.18, 128.91, 128.65, 128.60, 128.52, 128.28, 127.81, 126.94, 118.45, 110.12, 94.81 ppm; <sup>77</sup>Se NMR (CDCl<sub>3</sub>, 95.5 MHz): δ = 262.13 ppm. HRMS (+ESI) m/z: [M + H<sup>+</sup>] calculated for C<sub>22</sub>H<sub>15</sub>N<sub>2</sub>OSe<sup>+</sup> 403.0345, found 403.0347.

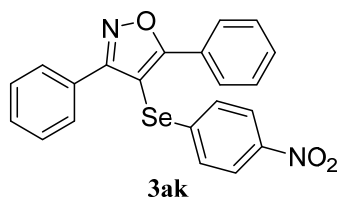

**4-((3,5-Diphenylisoxazol-4-yl)selenyl)benzonitrile (3ak):** Flash column chromatography eluent (petroleum ether/ethyl acetate = 10:1); Yield: 70% (147 mg); White solid; M.p.: 159-161 °C. <sup>1</sup>H NMR (CDCl<sub>3</sub>, 500 MHz): δ = 8.07-7.98 (m, 1H), 7.75-7.69 (m, 1H), 7.52-7.37 (m, 4H), 7.34-7.28 (m, 1H) ppm; <sup>13</sup>C NMR (CDCl<sub>3</sub>, 126 MHz): δ = 172.20, 164.47, 145.53, 140.76, 130.29, 129.21, 127.91, 127.60, 127.18, 126.78, 125.85, 123.37, 93.67 ppm; <sup>77</sup>Se NMR (CDCl<sub>3</sub>, 95 MHz): δ = 265.03 ppm. HRMS (+ESI) m/z: [M + H<sup>+</sup>] calculated for C<sub>21</sub>H<sub>15</sub>N<sub>2</sub>O<sub>3</sub>Se<sup>+</sup> 423.0243, found 423.0240.

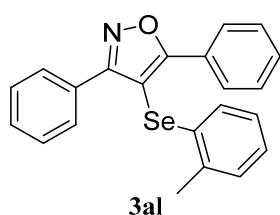

**3,5-Diphenyl-4-(o-tolylselenyl)isoxazole (3al)** (CAS No.: 1422017-98-8): Flash column chromatography eluent (petroleum ether/ethyl acetate = 75:1); Yield: 96% (188 mg); Yellow solid; M.p.: 130-132 °C (lit.<sup>[6]</sup> M.p.: 89-90 °C). <sup>1</sup>H NMR (CDCl<sub>3</sub>, 500 MHz): δ = 8.14-8.08 (m, 2H), 7.82-7.75 (m, 2H), 7.50-7.39 (m, 6H), 7.17 (d, *J* = 7.6 Hz, 1H), 7.15-7.08 (m, 1H), 7.05-6.99 (m, 2H), 2.38 (s, 3H) ppm; <sup>13</sup>C NMR (CDCl<sub>3</sub>, 125 MHz): δ = 171.75, 164.93, 135.47, 131.32, 129.73, 129.31, 128.78, 127.68, 127.66, 127.63, 127.33, 126.77, 126.30, 126.09, 125.34, 94.73, 20.15 ppm; <sup>77</sup>Se NMR (CDCl<sub>3</sub>, 95.5 MHz): δ = 208.91 ppm. GC-MS (EI) m/z: 391 (M<sup>+</sup>, 10%), 389 (6), 105 (100).

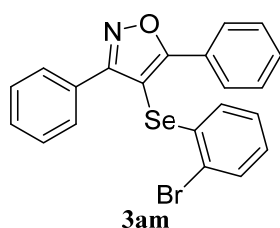

**4-((2-Bromophenyl)selenyl)-3,5-diphenylisoxazole (3am):** Flash column chromatography eluent (petroleum ether/ethyl acetate = 25:1); Yield: 87% (198 mg); White solid; M.p.: 149-151 °C. <sup>1</sup>H NMR (CDCl<sub>3</sub>, 500 MHz): δ = 8.11-8.04 (m, 2H), 7.83-7.76 (m, 2H), 7.54-7.41 (m, 7H), 7.12 (td, *J* = 7.6, 1.4

Hz, 1H), 7.05 (td,  $J = 7.6, 1.7$  Hz, 1H), 6.95 (dd,  $J = 7.9, 1.6$  Hz, 1H) ppm;  $^{13}\text{C}$  NMR ( $\text{CDCl}_3$ , 125 MHz):  $\delta = 173.32, 165.81, 134.70, 133.06, 131.07, 130.09, 128.87, 128.69, 128.60, 128.49, 128.34, 127.88, 127.59, 127.16, 122.27, 96.25$  ppm;  $^{77}\text{Se}$  NMR ( $\text{CDCl}_3$ , 95.5 MHz):  $\delta = 265.40$  ppm. HRMS (+ESI)  $m/z$ :  $[\text{M} + \text{H}^+]$  calculated for  $\text{C}_{21}\text{H}_{15}\text{BrNOSe}^+$  455.9497, found 455.9470.

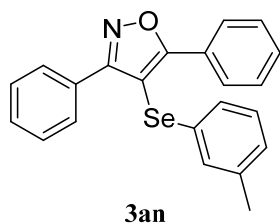

**3,5-Diphenyl-4-(m-tolylselenyl)isoxazole (3an)** (CAS No.: 2487302-15-6): Flash column chromatography eluent (petroleum ether/ethyl acetate = 75:1); Yield: 99% (193 mg); White solid; M.p.: 99-101 °C (lit.<sup>[7]</sup> M.p.: 99-100 °C).  $^1\text{H}$  NMR ( $\text{CDCl}_3$ , 500 MHz):  $\delta = 8.19-8.13$  (m, 2H), 7.86-7.80 (m, 2H), 7.52-7.41 (m, 6H), 7.10 (t,  $J = 7.6$  Hz, 1H), 7.07-6.97 (m, 3H), 2.25 (s, 3H) ppm;  $^{13}\text{C}$  NMR ( $\text{CDCl}_3$ , 125 MHz):  $\delta = 172.48, 165.90, 139.45, 131.45, 130.84, 129.90, 129.42, 129.40, 128.95, 128.88, 128.77, 128.47, 127.98, 127.60, 127.52, 125.87, 96.49, 21.40$  ppm;  $^{77}\text{Se}$  NMR ( $\text{CDCl}_3$ , 95.5 MHz):  $\delta = 270.62$  ppm. GC-MS (EI)  $m/z$ : 391 ( $\text{M}^+$ , 13%), 389 (7), 105 (100).

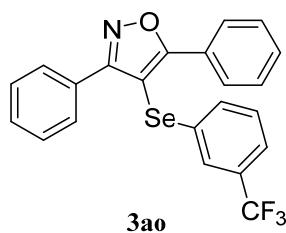

**3,5-Diphenyl-4-((3-(trifluoromethyl)phenyl)selenyl)isoxazole (3ao)** (CAS No.: 1422017-96-6): Flash column chromatography eluent (petroleum ether/ethyl acetate = 25:1); Yield: 83% (184 mg); White solid; M.p.: 90-93 °C (lit.<sup>[6]</sup> M.p.: 70-71 °C).  $^1\text{H}$  NMR ( $\text{CDCl}_3$ , 500 MHz):  $\delta = 8.10-8.07$  (m, 2H), 7.76-7.72 (m, 2H), 7.51-7.47 (m, 3H), 7.45-7.37 (m, 5H), 7.30 (d,  $J = 8.0$  Hz, 1H), 7.25 (t,  $J = 7.8$  Hz, 1H) ppm;  $^{13}\text{C}$  NMR ( $\text{CDCl}_3$ , 125 MHz):  $\delta = 171.48, 164.52, 131.46, 131.13, 130.57$  (q,  $J_{\text{CF}} = 32.7$  Hz), 129.97,

128.97, 128.78, 127.76, 127.69, 127.45, 127.41, 126.83, 126.09, 124.73 (q,  $J_{CF} = 3.8$  Hz), 122.50 (q,  $J_{CF} = 3.4$  Hz), 122.44 (q,  $J_{CF} = 272.8$  Hz), 94.91 ppm;  $^{77}\text{Se}$  NMR ( $\text{CDCl}_3$ , 95.5 MHz):  $\delta = 248.49$  ppm;  $^{19}\text{F}$  NMR ( $\text{CDCl}_3$ , 470 MHz)  $\delta = -62.82$  ppm. GC-MS (EI)  $m/z$ : 445 ( $\text{M}^+$ , 5%), 443 (3), 105 (100).

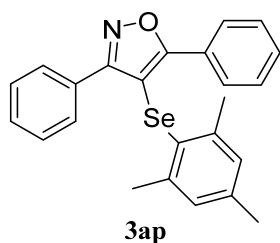

**4-(Mesitylselenyl)-3,5-diphenylisoxazole (3ap):** Flash column chromatography eluent (petroleum ether/ethyl acetate = 50:1); Yield: 93% (195 mg); Yellow solid; M.p.: 50-53 °C.  $^1\text{H}$  NMR ( $\text{CDCl}_3$ , 500 MHz):  $\delta = 8.05$ -7.98 (m, 2H), 7.52-7.44 (m, 5H), 7.43-7.39 (m, 1H), 7.37-7.32 (m, 2H), 6.66 (s, 2H), 2.16 (s, 3H), 2.08 (s, 6H) ppm;  $^{13}\text{C}$  NMR ( $\text{CDCl}_3$ , 125 MHz):  $\delta = 169.74$ , 166.13, 141.59, 138.06, 130.28, 129.34, 129.23, 128.85, 128.81, 128.52, 128.09, 127.92, 127.41, 99.88, 23.70, 20.79 ppm;  $^{77}\text{Se}$  NMR ( $\text{CDCl}_3$ , 95.5 MHz):  $\delta = 149.85$  ppm. HRMS (+ESI)  $m/z$ : [ $\text{M} + \text{H}^+$ ] calculated for  $\text{C}_{24}\text{H}_{22}\text{NOSe}^+$  420.0862, found 420.0855.

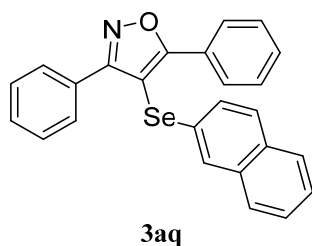

**4-(Naphthalen-2-ylselenenyl)-3,5-diphenylisoxazole (3aq):** Flash column chromatography eluent (petroleum ether/ethyl acetate = 20:1); Yield: 88% (187 mg); White solid; M.p.: 148-150 °C.  $^1\text{H}$  NMR ( $\text{CDCl}_3$ , 500 MHz):  $\delta = 8.21$ -8.16 (m, 2H), 7.87-7.82 (m, 2H), 7.80-7.76 (m, 1H), 7.71 (d,  $J = 8.6$  Hz, 1H), 7.69-7.63 (m, 2H), 7.50-7.40 (m, 8H), 7.34 (dd,  $J = 8.5, 1.9$  Hz, 1H) ppm;  $^{13}\text{C}$  NMR ( $\text{CDCl}_3$ , 125 MHz):  $\delta = 171.68$ , 164.86, 133.04, 130.90, 129.79, 128.83, 128.16, 128.02, 127.77, 127.67, 127.62, 127.37, 126.82, 126.71, 126.28, 126.01, 125.84, 125.62, 125.21, 124.85, 95.03 ppm;  $^{77}\text{Se}$  NMR ( $\text{CDCl}_3$ ,

95.5 MHz):  $\delta = 240.25$  ppm. HRMS (+ESI) m/z:  $[M + H^+]$  calculated for  $C_{25}H_{18}NOSe^+$  428.0549, found 428.0550.

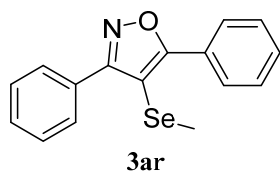

**4-(Methylselenenyl)-3,5-diphenylisoxazole (3ar)** (CAS No.: 2487302-18-9): Flash column chromatography eluent (petroleum ether/ethyl acetate = 50:1); Yield: 97% (152 mg); White solid; M.p.: 95-97 °C (lit.<sup>[7]</sup> M.p.: 95-97 °C).  $^1H$  NMR ( $CDCl_3$ , 500 MHz):  $\delta = 8.24$  8.21-8.15 (m, 2H), 7.99-7.94 (m, 2H), 7.56-7.49 (m, 6H), 1.95 (s, 3H) ppm;  $^{13}C$  NMR ( $CDCl_3$ , 125 MHz):  $\delta = 169.14$ , 163.87, 129.36, 128.75, 128.18, 127.63, 127.48, 126.78, 126.71, 96.81, 8.21 ppm;  $^{77}Se$  NMR ( $CDCl_3$ , 95.5 MHz):  $\delta = 36.96$  ppm. GC-MS (EI) m/z: 315 ( $M^+$ , 31%), 313 (16), 105 (100).

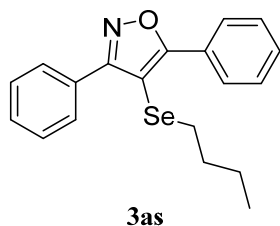

**4-(Butylselenenyl)-3,5-diphenylisoxazole (3as)** (CAS No.: 1422017-99-9): Flash column chromatography eluent (petroleum ether/ethyl acetate = 50:1); Yield: 97% (172 mg); Yellow oil.  $^1H$  NMR ( $CDCl_3$ , 500 MHz):  $\delta = 8.20$  (dd,  $J = 8.1, 1.5$  Hz, 2H), 7.95 (dd,  $J = 6.6, 3.0$  Hz, 2H), 7.55-7.48 (m, 6H), 2.47 (t,  $J = 7.3$  Hz, 2H), 1.35 (p,  $J = 7.3$  Hz, 2H), 1.15 (h,  $J = 7.4$  Hz, 2H), 0.68 (t,  $J = 7.3$  Hz, 3H) ppm;  $^{13}C$  NMR ( $CDCl_3$ , 125 MHz):  $\delta = 170.66$ , 165.36, 130.40, 129.78, 129.34, 128.89, 128.64, 128.49, 127.97, 127.88, 96.94, 31.57, 29.08, 22.44, 13.33 ppm;  $^{77}Se$  NMR ( $CDCl_3$ , 95.5 MHz):  $\delta = 109.27$  ppm. GC-MS (EI) m/z: 357 ( $M^+$ , 20%), 355 (10), 105 (100).

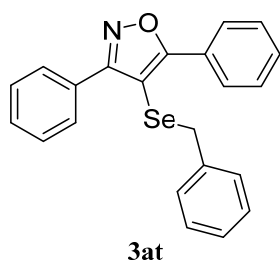

**4-(Benzylselenenyl)-3,5-diphenylisoxazole (3at):** Flash column chromatography eluent (petroleum ether/ethyl acetate = 30:1); Yield: 92% (179 mg); Yellow solid; M.p.: 79-81 °C. <sup>1</sup>H NMR (CDCl<sub>3</sub>, 500 MHz): δ = 8.03-7.99 (m, 2H), 7.88-7.85 (m, 2H), 7.53-7.49 (m, 3H), 7.48-7.45 (m, 3H), 7.11-7.07 (m, 3H), 6.89-6.85 (m, 2H), 3.67 (s, 2H) ppm; <sup>13</sup>C NMR (CDCl<sub>3</sub>, 125 MHz): δ = 170.36, 164.25, 136.10, 129.29, 128.69, 128.01, 127.79, 127.65, 127.40, 127.35, 127.23, 126.73, 126.57, 125.99, 95.62, 31.19 ppm; <sup>77</sup>Se NMR (CDCl<sub>3</sub>, 95.5 MHz): δ = 198.59 ppm. HRMS (+ESI) m/z: [M + H<sup>+</sup>] calculated for C<sub>22</sub>H<sub>18</sub>NOSe<sup>+</sup> 392.0549, found 392.0564.

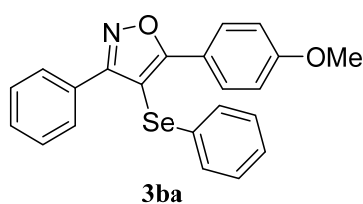

**5-(4-Methoxyphenyl)-3-phenyl-4-(phenylselenenyl)isoxazole (3ba)** (CAS No.: 1422018-04-9): Flash column chromatography eluent (petroleum ether/ethyl acetate = 25:1); Yield: 95% (193 mg); White solid; M.p.: 150-152 °C (lit.<sup>[5]</sup> M.p.: 132-134 °C). <sup>1</sup>H NMR (CDCl<sub>3</sub>, 500 MHz): δ = 8.16-8.06 (m, 2H), 7.82-7.70 (m, 2H), 7.47-7.38 (m, 3H), 7.24-7.11 (m, 5H), 7.01-6.95 (m, 2H), 3.84 (s, 3H) ppm; <sup>13</sup>C NMR (CDCl<sub>3</sub>, 125 MHz): δ = 172.48, 165.86, 161.57, 131.89, 129.82, 129.59, 129.51, 128.88, 128.60, 128.41, 126.54, 120.03, 114.19, 94.76, 55.39 ppm; <sup>77</sup>Se NMR (CDCl<sub>3</sub>, 95.5 MHz): δ = 235.95 ppm. GC-MS (EI) m/z: 407 (M<sup>+</sup>, 8%), 405 (4), 135 (100).



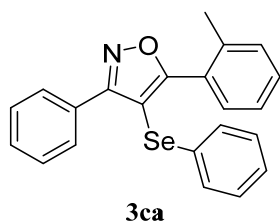

**3-Phenyl-4-(phenylselenyl)-5-(o-tolyl)isoxazole (3ca)** (CAS No.: 1422018-02-7): Flash column chromatography eluent (petroleum ether/ethyl acetate = 50:1); Yield: 97% (190 mg); Yellow oil.  $^1\text{H}$  NMR ( $\text{CDCl}_3$ , 500 MHz):  $\delta$  = 7.84-7.74 (m, 2H), 7.30-7.20 (m, 5H), 7.14 (d,  $J$  = 7.6 Hz, 1H), 7.08 (t,  $J$  = 7.5 Hz, 1H), 6.98 (s, 5H), 2.21 (s, 3H) ppm;  $^{13}\text{C}$  NMR ( $\text{CDCl}_3$ , 125 MHz):  $\delta$  = 175.59, 164.32, 138.21, 131.56, 130.77, 130.71, 130.54, 130.00, 129.63, 129.39, 128.90, 128.67, 128.58, 127.17, 126.78, 125.69, 99.45, 20.34 ppm;  $^{77}\text{Se}$  NMR ( $\text{CDCl}_3$ , 95.5 MHz):  $\delta$  = 234.66 ppm. GC-MS (EI)  $m/z$ : 391 ( $\text{M}^+$ , 14%), 389 (7), 119 (100).

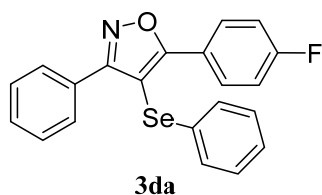

**5-(4-Fluorophenyl)-3-phenyl-4-(phenylselenyl)isoxazole (3da)** (CAS No.: 2487302-29-2): Flash column chromatography eluent (petroleum ether/ethyl acetate = 50:1); Yield: 98% (193 mg); White solid; M.p.: 93-95 °C (lit.<sup>[7]</sup> M.p.: 112-113 °C).  $^1\text{H}$  NMR ( $\text{CDCl}_3$ , 500 MHz):  $\delta$  = 8.17-8.12 (m, 2H), 7.80-7.75 (m, 2H), 7.48-7.40 (m, 3H), 7.21-7.13 (m, 7H) ppm;  $^{13}\text{C}$  NMR ( $\text{CDCl}_3$ , 125 MHz):  $\delta$  = 171.49, 165.86, 164.14 (d,  $J_{\text{CF}}$  = 253.1 Hz), 131.41, 130.10 (d,  $J_{\text{CF}}$  = 8.2 Hz), 129.95, 129.64, 128.84 (d,  $J_{\text{CF}}$  = 5.9 Hz), 128.67, 128.46, 126.77, 123.72 (d,  $J_{\text{CF}}$  = 3.4 Hz), 116.07, 115.89, 96.25 ppm;  $^{77}\text{Se}$  NMR ( $\text{CDCl}_3$ , 95.5 MHz):  $\delta$  = 235.78 ppm;  $^{19}\text{F}$  NMR ( $\text{CDCl}_3$ , 470 MHz)  $\delta$  = -108.16 ppm. GC-MS (EI)  $m/z$ : 395 ( $\text{M}^+$ , 9%), 393 (4), 123 (100).

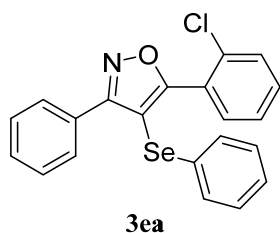

**5-(2-Chlorophenyl)-3-phenyl-4-(phenylselenenyl)isoxazole (3ea)** (CAS No.: 2487302-28-1): Flash column chromatography eluent (petroleum ether/ethyl acetate = 30:1); Yield: 87% (179 mg); Yellow oil.  $^1\text{H}$  NMR ( $\text{CDCl}_3$ , 500 MHz):  $\delta$  = 7.99-7.93 (m, 2H), 7.55-7.51 (m, 1H), 7.50-7.41 (m, 5H), 7.34 (td,  $J$  = 7.5, 0.9 Hz, 1H), 7.20-7.12 (m, 5H) ppm;  $^{13}\text{C}$  NMR ( $\text{CDCl}_3$ , 125 MHz):  $\delta$  = 172.61, 164.15, 134.31, 132.03, 131.95, 130.97, 130.22, 130.06, 129.89, 129.36, 128.63, 128.58, 127.08, 126.89, 126.71, 101.04 ppm;  $^{77}\text{Se}$  NMR ( $\text{CDCl}_3$ , 95.5 MHz):  $\delta$  = 236.40 ppm. GC-MS (EI)  $m/z$ : 411 ( $\text{M}^+$ , 12%), 409 (6), 139 (100).

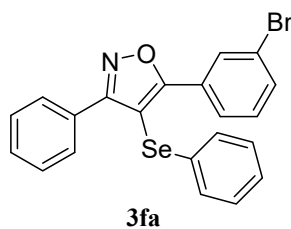

**5-(3-Bromophenyl)-3-phenyl-4-(phenylselenenyl)isoxazole (3fa)** (CAS No.: 2734166-09-5): Flash column chromatography eluent (petroleum ether/ethyl acetate = 25:1); Yield: 84% (191 mg); Yellow oil.  $^1\text{H}$  NMR ( $\text{CDCl}_3$ , 500 MHz):  $\delta$  = 8.31-8.26 (m, 1H), 8.09-8.05 (m, 1H), 7.67-7.60 (m, 2H), 7.62-7.58 (m, 1H), 7.48-7.40 (m, 3H), 7.12 (t,  $J$  = 7.9 Hz, 1H), 7.05-6.97 (m, 5H) ppm;  $^{13}\text{C}$  NMR ( $\text{CDCl}_3$ , 125 MHz):  $\delta$  = 170.51, 165.82, 133.71, 131.16, 130.80, 130.30, 130.05, 129.68, 129.31, 129.24, 128.94, 128.60, 128.53, 127.00, 126.41, 122.82, 97.78 ppm;  $^{77}\text{Se}$  NMR ( $\text{CDCl}_3$ , 95.5 MHz):  $\delta$  = 236.30 ppm. GC-MS (EI)  $m/z$ : 455 ( $\text{M}^+$ , 10%), 453 (5), 169 (100).

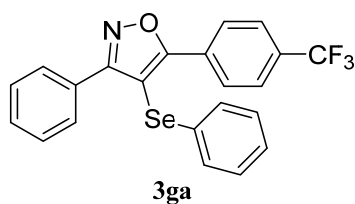

**3-Phenyl-4-(phenylselenenyl)-5-(4-(trifluoromethyl)phenyl)isoxazole (3ga):** Flash column chromatography eluent (petroleum ether/ethyl acetate = 25:1); Yield: 86% (192 mg); Yellow solid; M.p.: 106-110 °C. <sup>1</sup>H NMR (CDCl<sub>3</sub>, 500 MHz): δ = 8.26 (d, *J* = 8.2 Hz, 2H), 7.79-7.76 (m, 2H), 7.74 (d, *J* = 8.3 Hz, 2H), 7.48-7.40 (m, 3H), 7.23-7.14 (m, 5H) ppm; <sup>13</sup>C NMR (CDCl<sub>3</sub>, 125 MHz): δ = 170.67, 165.97, 132.24 (q, *J*<sub>CF</sub> = 32.9 Hz), 131.03, 130.62, 130.07, 129.70, 129.03, 128.88, 128.51, 128.43, 128.21, 126.97, 125.72 (q, *J*<sub>CF</sub> = 4.0 Hz), 123.74 (q, *J*<sub>CF</sub> = 272.7 Hz), 98.16 ppm; <sup>77</sup>Se NMR (CDCl<sub>3</sub>, 95.5 MHz): δ = 236.54 ppm; <sup>19</sup>F NMR (CDCl<sub>3</sub>, 470 MHz) δ = -62.94 ppm. HRMS (+ESI) *m/z*: [M + H<sup>+</sup>] calculated for C<sub>22</sub>H<sub>15</sub>F<sub>3</sub>NOSe<sup>+</sup> 446.0266, found 446.0256.

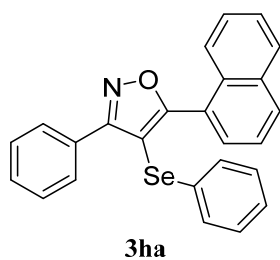

**5-(Naphthalen-1-yl)-3-phenyl-4-(phenylselenenyl)isoxazole (3ha)** (CAS No.: 1422018-06-1): Flash column chromatography eluent (petroleum ether/ethyl acetate = 30:1); Yield: 97% (207 mg); White solid; M.p.: 114-116 °C (lit.<sup>[6]</sup> M.p.: 106-107 °C). <sup>1</sup>H NMR (CDCl<sub>3</sub>, 500 MHz): δ = 8.03-7.96 (m, 3H), 7.96-7.91 (m, 2H), 7.64 (dd, *J* = 7.1, 0.9 Hz, 1H), 7.59-7.50 (m, 3H), 7.50-7.44 (m, 3H), 7.14-7.04 (m, 5H) ppm; <sup>13</sup>C NMR (CDCl<sub>3</sub>, 125 MHz): δ = 174.63, 164.56, 133.59, 131.63, 131.28, 131.24, 130.00, 129.84, 129.27, 128.88, 128.72, 128.57, 128.50, 127.24, 126.74, 126.50, 125.43, 124.92, 124.85, 100.77 ppm; <sup>77</sup>Se NMR (CDCl<sub>3</sub>, 95.5 MHz): δ = 238.98 ppm. GC-MS (EI) *m/z*: 427 (M<sup>+</sup>, 7%), 425 (3), 127 (100).

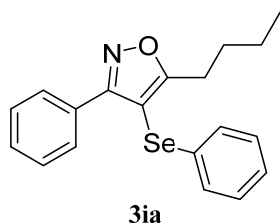

**5-Butyl-3-phenyl-4-(phenylselenenyl)isoxazole (3ia)** (CAS No.: 1422018-07-2): Flash column chromatography eluent (petroleum ether/ethyl acetate = 75:1); Yield: 95% (170 mg); Yellow oil.  $^1\text{H}$  NMR ( $\text{CDCl}_3$ , 500 MHz):  $\delta$  = 7.89-7.83 (m, 2H), 7.46-7.37 (m, 3H), 7.24-7.14 (m, 5H), 2.97 (t,  $J$  = 7.55 Hz, 2H), 1.76-1.69 (m, 2H), 1.39 (dq,  $J$  = 14.7, 7.4 Hz, 2H), 0.93 (t,  $J$  = 7.3 Hz, 3H) ppm;  $^{13}\text{C}$  NMR ( $\text{CDCl}_3$ , 125 MHz):  $\delta$  = 178.97, 163.87, 131.87, 129.85, 129.46, 128.99, 128.87, 128.50, 126.56, 97.23, 29.70, 26.45, 22.33, 13.70 ppm;  $^{77}\text{Se}$  NMR ( $\text{CDCl}_3$ , 95.5 MHz):  $\delta$  = 215.89 ppm. GC-MS (EI)  $m/z$ : 357 ( $\text{M}^+$ , 36%), 355 (18), 169 (100).

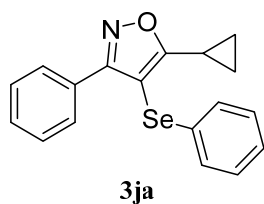

**5-Cyclopropyl-3-phenyl-4-(phenylselenenyl)isoxazole (3ja)** (CAS No.: 2487302-31-6): Flash column chromatography eluent (petroleum ether/ethyl acetate = 75:1); Yield: 88% (150 mg); Yellow oil.  $^1\text{H}$  NMR ( $\text{CDCl}_3$ , 500 MHz):  $\delta$  = 7.82-7.70 (m, 2H), 7.40-7.33 (m, 3H), 7.22-7.12 (m, 5H), 2.41-2.32 (m, 1H), 1.27-1.23 (m, 2H), 1.09-1.04 (m, 2H) ppm;  $^{13}\text{C}$  NMR ( $\text{CDCl}_3$ , 125 MHz):  $\delta$  = 178.85, 164.23, 131.95, 129.85, 129.48, 128.86, 128.57, 128.48, 126.52, 96.37, 9.13, 8.82 ppm;  $^{77}\text{Se}$  NMR ( $\text{CDCl}_3$ , 95.5 MHz):  $\delta$  = 211.14 ppm. GC-MS (EI)  $m/z$ : 341 ( $\text{M}^+$ , 16%), 339(8), 69 (100).

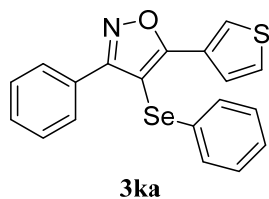

**3-Phenyl-4-(phenylselenyl)-5-(thiophen-3-yl)isoxazole (3ka)** (CAS No.:2734166-10-8): Flash column chromatography eluent (petroleum ether/ethyl acetate = 75:1); Yield: 91% (174 mg); White solid; M.p.: 105-107 °C (lit.<sup>[6]</sup> M.p.: 104-106 °C). <sup>1</sup>H NMR (CDCl<sub>3</sub>, 500 MHz):  $\delta$  = 8.31 (dd,  $J$  = 3.0, 1.1 Hz, 1H), 7.88 (dd,  $J$  = 5.1, 1.2 Hz, 1H), 7.83-7.80 (m, 2H), 7.46-7.39 (m, 4H), 7.25-7.17 (m, 5H) ppm; <sup>13</sup>C NMR (CDCl<sub>3</sub>, 126 MHz):  $\delta$  = 169.27, 165.54, 131.36, 129.94, 129.68, 128.88, 128.74, 128.71, 128.48, 128.30, 127.37, 126.72, 126.46, 126.35, 95.52 ppm; <sup>77</sup>Se NMR (CDCl<sub>3</sub>, 95 MHz):  $\delta$  = 230.27 ppm. GC-MS(EI) m/z: 383 (M<sup>+</sup>, 7%), 381 (4), 111 (100).

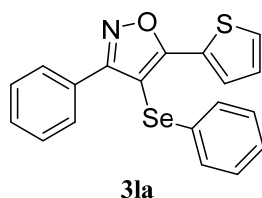

**3-Phenyl-4-(phenylselenyl)-5-(thiophen-2-yl)isoxazole (3la)**: Flash column chromatography eluent (petroleum ether/ethyl acetate = 75:1); Yield: 96% (183 mg); Yellow solid; M.p.: 97-99 °C. <sup>1</sup>H NMR (CDCl<sub>3</sub>, 500 MHz):  $\delta$  = 7.96 (dd,  $J$  = 3.7, 0.9 Hz, 1H), 7.84-7.78 (m, 2H), 7.51 (dd,  $J$  = 5.0, 1.1 Hz, 1H), 7.47-7.40 (m, 3H), 7.25-7.14 (m, 6H) ppm; <sup>13</sup>C NMR (CDCl<sub>3</sub>, 125 MHz):  $\delta$  = 168.73, 165.42, 131.21, 130.04, 129.99, 129.59, 129.45, 128.97, 128.81, 128.49, 128.30, 127.66, 126.79, 95.52 ppm; <sup>77</sup>Se NMR (CDCl<sub>3</sub>, 95.5 MHz):  $\delta$  = 227.89 ppm. HRMS (+ESI) m/z: [M + H<sup>+</sup>] calculated for C<sub>19</sub>H<sub>14</sub>NOSse<sup>+</sup> 383.9956, found 383.9969.

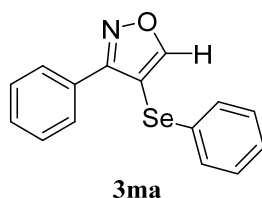

**3-Phenyl-4-(phenylselenyl)isoxazole (3ma)**: Flash column chromatography eluent (petroleum ether/ethyl acetate = 50:1); Yield: 25% (38 mg); Yellow oil. <sup>1</sup>H NMR (CDCl<sub>3</sub>, 500 MHz):  $\delta$  = 8.55 (s, 1H), 7.86-7.82 (m, 2H), 7.47-7.39 (m, 3H), 7.32-7.27 (m, 2H), 7.25-7.20 (m, 3H) ppm; <sup>13</sup>C NMR (CDCl<sub>3</sub>,

125 MHz):  $\delta = 164.01, 162.67, 130.68, 130.34, 130.04, 129.53, 128.59, 128.46, 128.13, 127.22, 101.48$  ppm;  $^{77}\text{Se}$  NMR ( $\text{CDCl}_3$ , 95.5 MHz):  $\delta = 224.62$  ppm. HRMS (+ESI)  $m/z$ :  $[\text{M} + \text{H}^+]$  calculated for  $\text{C}_{15}\text{H}_{12}\text{NOSe}^+$  302.0079, found 302.0087.

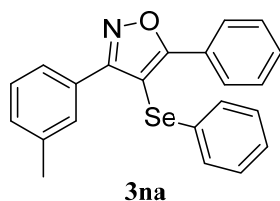

**5-Phenyl-4-(phenylselenenyl)-3-(m-tolyl)isoxazole (3na)** (CAS No.: 2487302-24-7): Flash column chromatography eluent (petroleum ether/ethyl acetate = 50:1); Yield: 95% (186 mg); Yellow oil.  $^1\text{H}$  NMR ( $\text{CDCl}_3$ , 500 MHz):  $\delta = 8.23\text{-}8.17$  (m, 2H), 7.67-7.62 (m, 2H), 7.53-7.49 (m, 3H), 7.35 (t,  $J = 7.6$  Hz, 1H), 7.32-7.27 (m, 3H), 7.26-7.18 (m, 3H), 2.40 (s, 3H) ppm;  $^{13}\text{C}$  NMR ( $\text{CDCl}_3$ , 125 MHz):  $\delta = 172.46, 166.03, 138.12, 131.86, 130.88, 130.70, 129.64, 128.97, 128.80, 128.70, 128.39, 127.96, 127.53, 126.71, 126.03, 96.61, 21.48$  ppm;  $^{77}\text{Se}$  NMR ( $\text{CDCl}_3$ , 95.5 MHz):  $\delta = 238.12$  ppm. GC-MS (EI)  $m/z$ : 391 ( $\text{M}^+$ , 20%), 389(11), 105 (100).

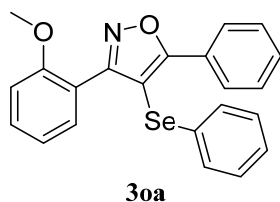

**3-(2-Methoxyphenyl)-5-phenyl-4-(phenylselenenyl)isoxazole (3oa)** (CAS No.: 2734166-11-9): Flash column chromatography eluent (petroleum ether/ethyl acetate = 25:1); Yield: 87% (176 mg); White solid; M.p.: 127-129 °C (lit.<sup>[5]</sup> M.p.: 124-126 °C).  $^1\text{H}$  NMR ( $\text{CDCl}_3$ , 500 MHz):  $\delta = 8.24\text{-}8.18$  (m, 2H), 7.48-7.43 (m, 4H), 7.40 (dd,  $J = 7.4, 1.8$  Hz, 1H), 7.22-7.13 (m, 5H), 7.06-7.02 (m, 1H), 6.97 (d,  $J = 8.3$  Hz, 1H), 3.62 (s, 3H) ppm;  $^{13}\text{C}$  NMR ( $\text{CDCl}_3$ , 125 MHz):  $\delta = 169.48, 164.81, 156.46, 130.38, 130.27, 130.12, 129.46, 128.21, 128.04, 127.57, 126.47, 126.38, 125.27, 119.30, 116.82, 109.80, 98.08, 54.04$  ppm;  $^{77}\text{Se}$  NMR ( $\text{CDCl}_3$ , 95.5 MHz):  $\delta = 243.56$  ppm. GC-MS (EI)  $m/z$ : 407 ( $\text{M}^+$ , 8%), 405 (4), 105 (100).

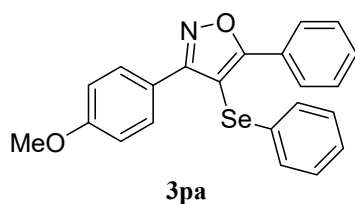

**3-(4-Methoxyphenyl)-5-phenyl-4-(phenylselenenyl)isoxazole (3pa):** Flash column chromatography eluent (petroleum ether/ethyl acetate = 25:1); Yield: 89% (181 mg); White solid; M.p.: 158-160 °C. <sup>1</sup>H NMR (CDCl<sub>3</sub>, 500 MHz): δ = 8.16 -8.05 (m, 2H), 7.81-7.71 (m, 2H), 7.50-7.44 (m, 3H), 7.25-7.12 (m, 5H), 6.96-6.91 (m, 2H), 3.82 (s, 3H) ppm; <sup>13</sup>C NMR (CDCl<sub>3</sub>, 125 MHz): δ = 172.50, 165.29, 160.94, 131.80, 130.76, 130.21, 129.59, 128.70, 128.67, 127.93, 127.52, 126.58, 121.14, 113.93, 96.17, 55.29 ppm; <sup>77</sup>Se NMR (CDCl<sub>3</sub>, 95.5 MHz): δ = 237.07 ppm. HRMS (+ESI) m/z: [M + H<sup>+</sup>] calculated for C<sub>22</sub>H<sub>18</sub>NO<sub>2</sub>Se<sup>+</sup> 408.0498, found 408.0487.

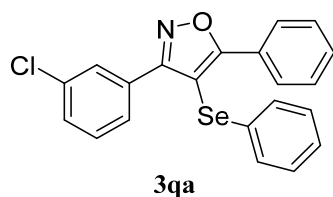

**3-(3-Chlorophenyl)-5-phenyl-4-(phenylselenenyl)isoxazole (3qa):** Flash column chromatography eluent (petroleum ether/ethyl acetate = 20:1); Yield: 90% (186 mg); White solid; M.p.: 69-72 °C. <sup>1</sup>H NMR (CDCl<sub>3</sub>, 500 MHz): δ = 8.17-8.09 (m, 2H), 7.78 (t, *J* = 1.8 Hz, 1H), 7.66 (dt, *J* = 7.5, 1.1 Hz, 1H), 7.52-7.46 (m, 3H), 7.44-7.38 (m, 1H), 7.33 (t, *J* = 7.8 Hz, 1H), 7.23-7.14 (m, 5H) ppm; <sup>13</sup>C NMR (CDCl<sub>3</sub>, 125 MHz): δ = 172.62, 164.56, 134.34, 131.18, 130.96, 130.49, 129.92, 129.68, 129.63, 129.20, 128.97, 128.79, 127.92, 127.25, 126.98, 126.91, 96.58 ppm; <sup>77</sup>Se NMR (CDCl<sub>3</sub>, 95.5 MHz): δ = 236.15 ppm. HRMS (+ESI) m/z: [M + H<sup>+</sup>] calculated for C<sub>21</sub>H<sub>15</sub>ClNOSe<sup>+</sup> 412.0002, found 412.0008.

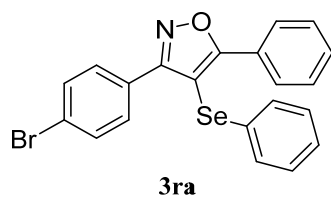

**3-(4-Bromophenyl)-5-phenyl-4-(phenylselenenyl)isoxazole (3ra):** Flash column chromatography eluent (petroleum ether/ethyl acetate = 20:1); Yield: 86% (197 mg); White solid; M.p.: 129-132 °C. <sup>1</sup>H NMR (CDCl<sub>3</sub>, 500 MHz): δ = 8.16-8.10 (m, 2H), 7.71-7.66 (m, 2H), 7.57-7.52 (m, 2H), 7.50-7.45 (m, 3H), 7.23-7.15 (m, 5H) ppm; <sup>13</sup>C NMR (CDCl<sub>3</sub>, 125 MHz): δ = 172.81, 164.83, 131.73, 131.40, 131.00, 130.40, 129.71, 128.82, 127.93, 127.72, 127.25, 126.84, 124.56, 96.21 ppm; <sup>77</sup>Se NMR (CDCl<sub>3</sub>, 95.5 MHz): δ = 235.97 ppm. HRMS (+ESI) m/z: [M + H<sup>+</sup>] calculated for C<sub>21</sub>H<sub>15</sub>BrNOSe<sup>+</sup> 455.9497, found 455.9489.

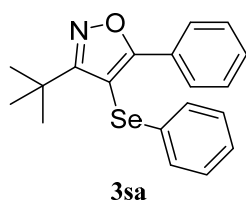

**3-(Tert-butyl)-5-phenyl-4-(phenylselenenyl)isoxazole (3sa)** (CAS No.: 2734166-14-2): Flash column chromatography eluent (petroleum ether/ethyl acetate = 50:1); Yield: 93% (166 mg); White solid; M.p.: 90-93 °C (lit.<sup>[5]</sup> M.p.: 82-84 °C). <sup>1</sup>H NMR (CDCl<sub>3</sub>, 500 MHz): δ = 8.02-7.96 (m, 2H), 7.44-7.37 (m, 3H), 7.23-7.18 (m, 2H), 7.18-7.13 (m, 3H), 1.48 (s, 9H) ppm; <sup>13</sup>C NMR (CDCl<sub>3</sub>, 125 MHz): δ = 173.03, 172.56, 132.61, 130.55, 129.52, 128.58, 127.96, 127.75, 127.59, 126.21, 94.61, 33.96, 28.78 ppm; <sup>77</sup>Se NMR (CDCl<sub>3</sub>, 95.5 MHz): δ = 238.73 ppm. GC-MS (EI) m/z: 357 (M<sup>+</sup>, 14%), 355 (7), 105 (100).

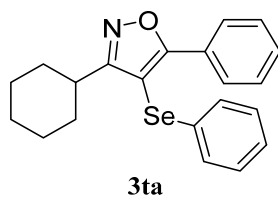



**3-Cyclohexyl-5-phenyl-4-(phenylselenenyl)isoxazole (3ta)**: Flash column chromatography eluent (petroleum ether/ethyl acetate = 75:1); Yield: 97% (185 mg); Yellow solid; M.p.: 78-81 °C. <sup>1</sup>H NMR (CDCl<sub>3</sub>, 500 MHz): δ 8.10-8.04 (m, 2H), 7.45-7.39 (m, 3H), 7.23-7.15 (m, 5H), 2.80 (tt, *J* = 11.9, 3.4 Hz, 1H), 1.90 (d, *J* = 13.9 Hz, 2H), 1.84-1.76 (m, 2H), 1.73-1.57 (m, 3H), 1.37-1.25 (m, 3H) ppm; <sup>13</sup>C NMR (CDCl<sub>3</sub>, 125 MHz): δ = 171.09, 170.87, 131.57, 130.51, 129.50, 128.70, 128.64, 127.66, 127.58, 126.55, 96.61, 36.29, 31.57, 26.28, 25.90 ppm; <sup>77</sup>Se NMR (CDCl<sub>3</sub>, 95.5 MHz): δ = 216.74 ppm. HRMS (+ESI) *m/z*: [M + H<sup>+</sup>] calculated for C<sub>21</sub>H<sub>22</sub>N<sub>2</sub>OSe<sup>+</sup> 384.0862, found 384.0884.

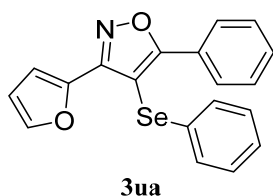

**3-(Furan-2-yl)-5-phenyl-4-(phenylselenenyl)isoxazole (3ua)** (CAS No.: 2734166-13-1): Flash column chromatography eluent (petroleum ether/ethyl acetate = 50:1); Yield: 88% (161 mg); Yellow solid; M.p.: 104-107 °C (lit.<sup>[5]</sup> M.p.: 104-106 °C). <sup>1</sup>H NMR (CDCl<sub>3</sub>, 500 MHz): δ = 8.13-8.09 (m, 2H), 7.60-7.56 (m, 1H), 7.51-7.45 (m, 3H), 7.31 (d, *J* = 3.5 Hz, 1H), 7.28-7.18 (m, 5H), 6.48 (dd, *J* = 3.6, 1.8 Hz, 1H) ppm; <sup>13</sup>C NMR (CDCl<sub>3</sub>, 125 MHz): δ = 172.64, 157.31, 144.13, 143.27, 131.03, 130.98, 129.68, 128.73, 128.62, 128.05, 127.02, 126.74, 113.26, 111.50, 94.32 ppm; <sup>77</sup>Se NMR (CDCl<sub>3</sub>, 95.5 MHz): δ = 236.51 ppm. GC-MS (EI) *m/z*: 367 (M<sup>+</sup>, 18%), 365 (8), 105 (100).

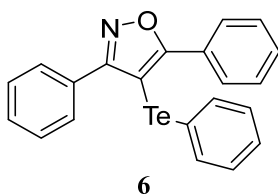

**3,5-Diphenyl-4-(phenyltellanyl)isoxazole (6)**: Eluent: Flash column chromatography eluent (petroleum ether/ethyl acetate = 50:1); Yield: 46% (98 mg); Yellow solid; M.p.: 99-101 °C. <sup>1</sup>H NMR (CDCl<sub>3</sub>, 500 MHz): δ = 8.07-7.99 (m, 2H), 7.72-7.66 (m, 2H), 7.51-7.38 (m, 6H), 7.37-7.30 (m, 2H), 7.22-7.15 (m,

1H), 7.11 (t,  $J = 7.5$  Hz, 2H) ppm;  $^{13}\text{C}$  NMR ( $\text{CDCl}_3$ , 126 MHz):  $\delta = 174.72, 167.96, 134.97, 130.68, 129.76, 129.71, 129.66, 129.29, 128.70, 128.58, 128.33, 128.06, 127.62, 115.32, 79.23$  ppm. HRMS (+ESI)  $m/z$ :  $[\text{M}+\text{H}^+]$  calculated for  $\text{C}_{21}\text{H}_{16}\text{NOTe}^+$  428.0289, found 428.0273.

## 5. References:

- [1] J. P. Waldo and R. C. Larock, *J. Org. Chem.* 2007, **72**, 9643-9647.
- [2] D. Singh, A. M. Deobald, L. R. S. Camargo, G. Tabarelli, O. E. D. Rodrigues and A. L. Braga, *Org. Lett.* 2010, **12**, 3288-3291.
- [3] T. Leng, G. Wu, Y. B. Zhou, W. X. Gao, J. C. Ding, X. B. Huang, M. C. Liu and H. Y. Wu, *Adv. Synth. Catal.* 2018, **360**, 4336-4340.
- [4] J. Wang, X. X. Lu, R. P. Yang, B. B. Zhang, Z. H. Xiang, J. C. Li, L. Liu, S. Chao and X. Shang, *Org. Lett.* 2023, **25**, 8489-8494.
- [5] Z. Yu, D. Zhang, X. Li, B. Zhang, Z. Yang, Y. Qian and Y. Du, *Asian J. Org. Chem.*, 2021, **10**, 3015-3019.
- [6] A. Speranca, B. Godoi and G. Zeni, *J. Org. Chem.*, 2013, **78**, 1630-1637.
- [7] J. Wu, Y. F. Yang, X. B. Huang, W. X. Gao, Y. B. Zhou, M. C. Liu and H. Y. Wu, *ACS Omega*, 2020, **5**, 23358-23363.

## 6. $^1\text{H}$ , $^{13}\text{C}$ , $^{77}\text{Se}$ and $^{19}\text{F}$ NMR spectra of products

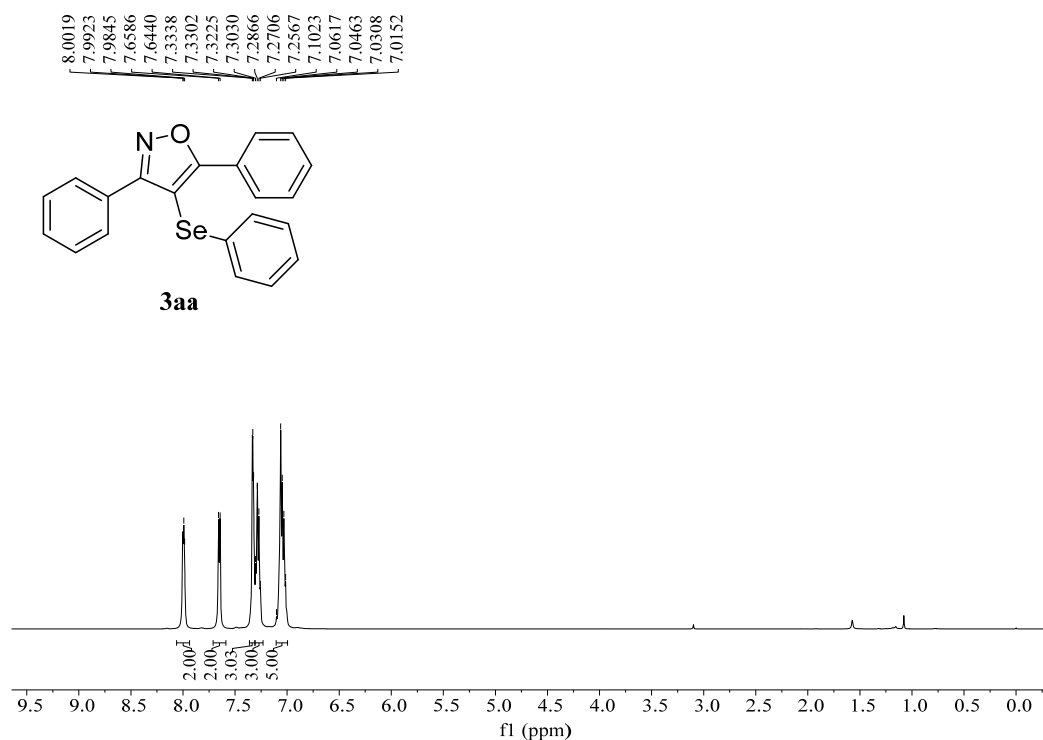

Figure S9  $^1\text{H}$  NMR (500 MHz) spectrum of **3aa** in  $\text{CDCl}_3$

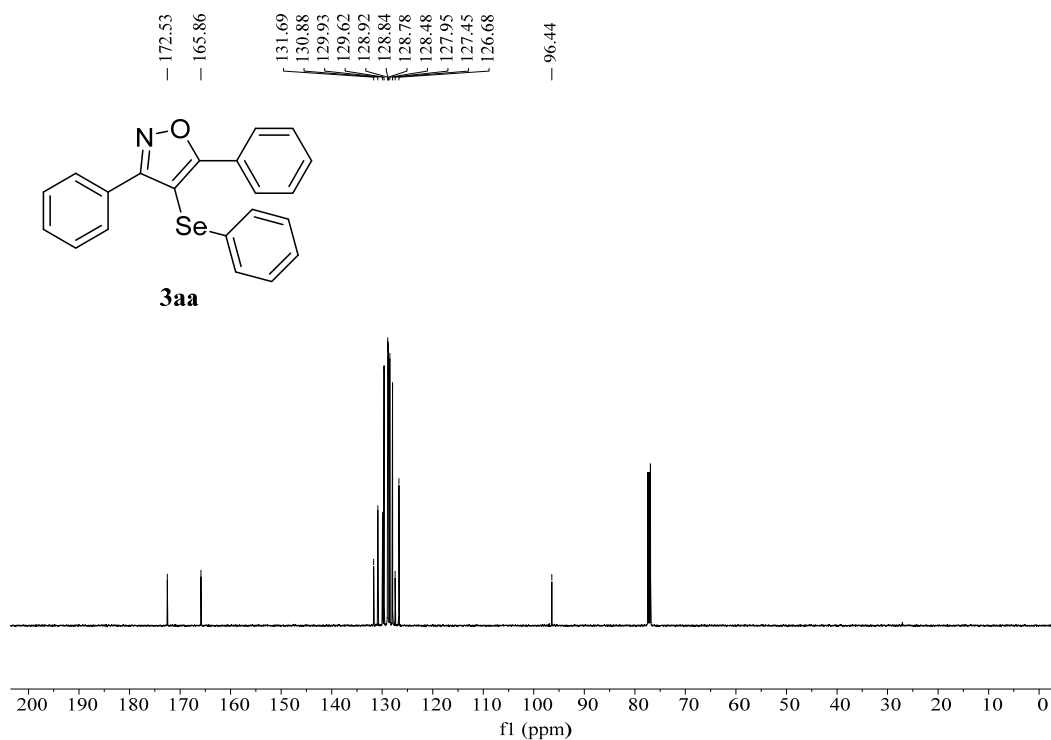

Figure S10  $^{13}\text{C}$  NMR (125 MHz) spectrum of **3aa** in  $\text{CDCl}_3$

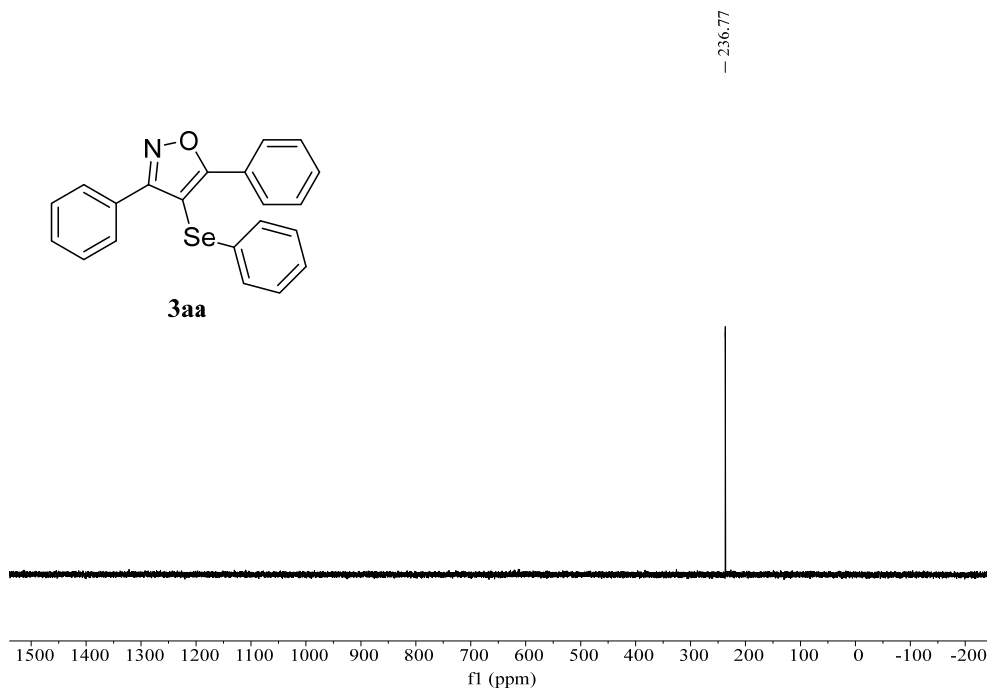

**Figure S11**  $^{77}\text{Se}$  NMR (95.5 MHz) spectrum of **3aa** in  $\text{CDCl}_3$

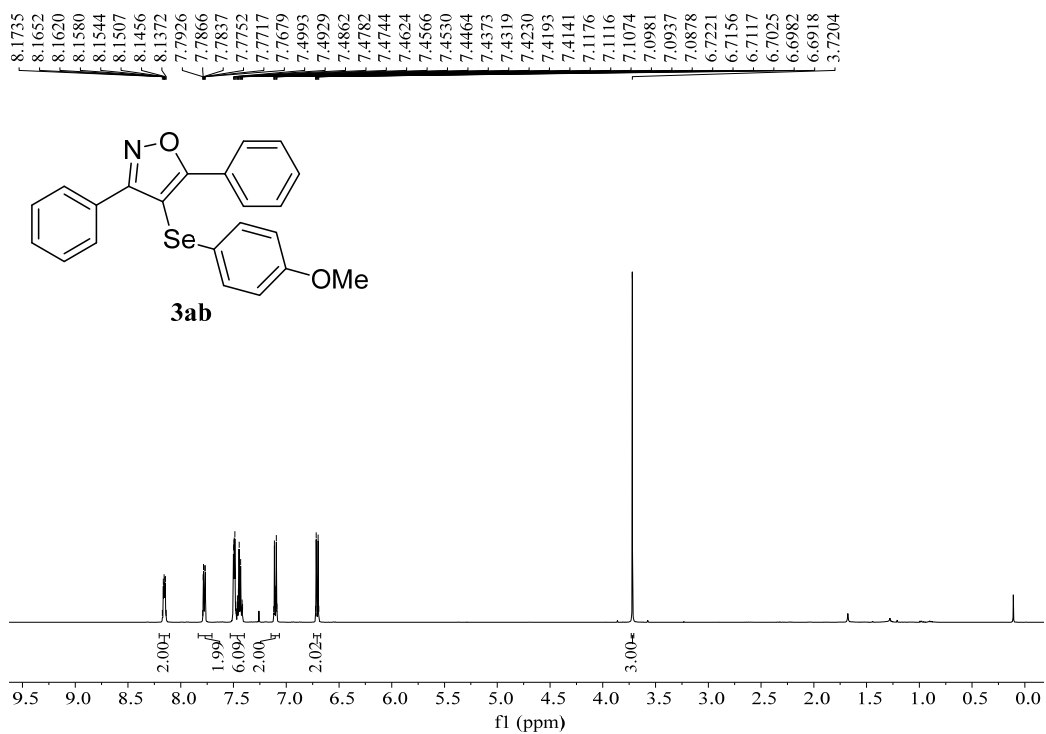

**Figure S12**  $^1\text{H}$  NMR (500 MHz) spectrum of **3ab** in  $\text{CDCl}_3$

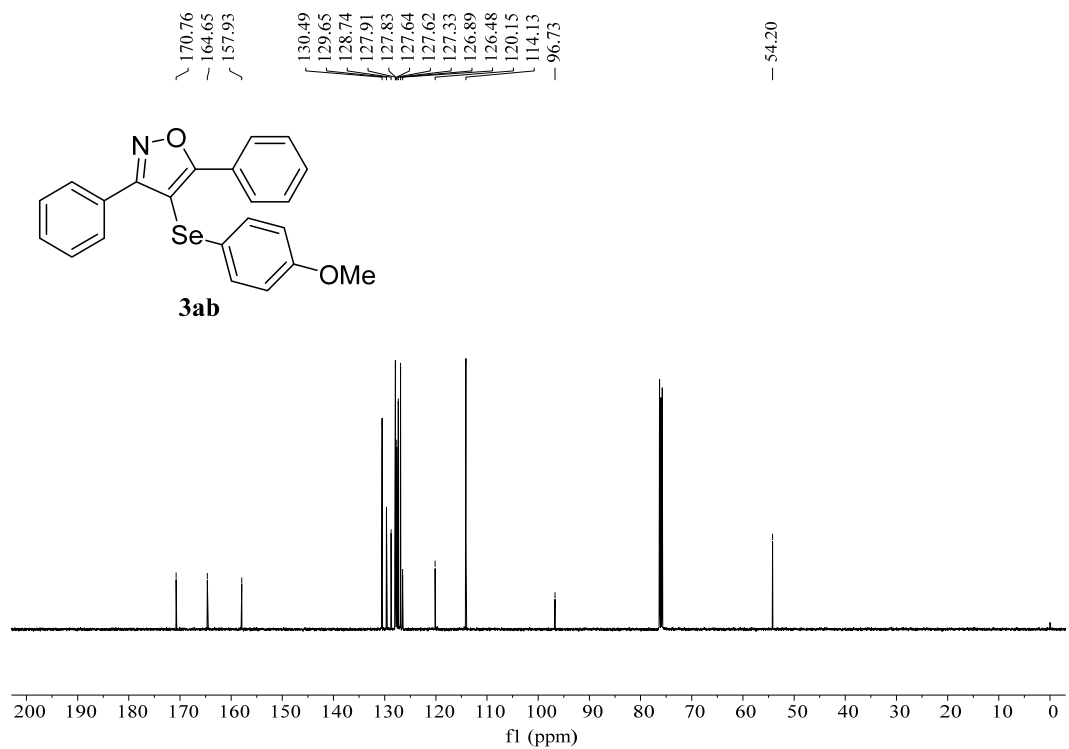

**Figure S13** <sup>13</sup>C NMR (125 MHz) spectrum of **3ab** in CDCl<sub>3</sub>

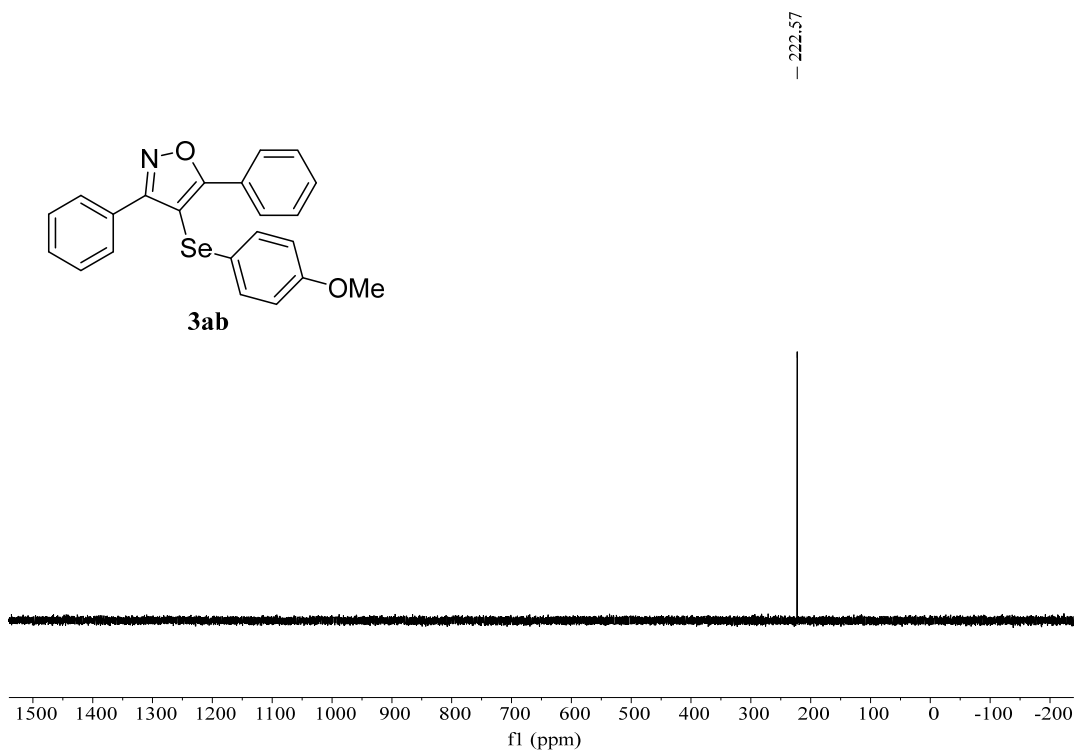

**Figure S14** <sup>77</sup>Se NMR (95.5 MHz) spectrum of **3ab** in CDCl<sub>3</sub>

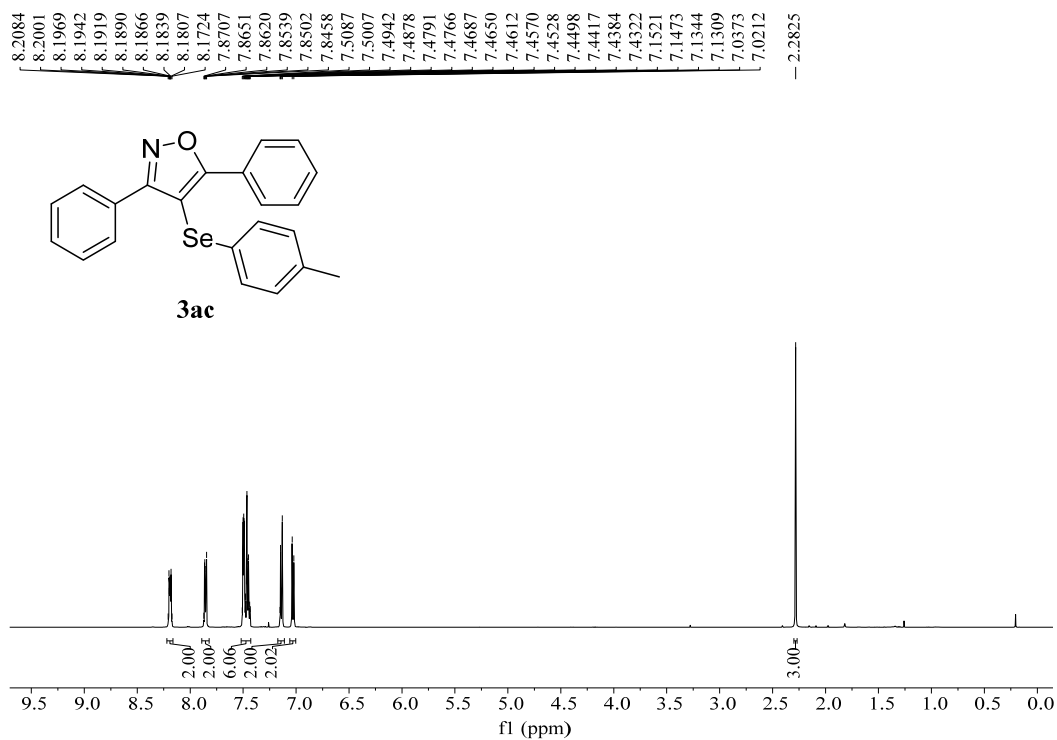

**Figure S15** <sup>1</sup>H NMR (500 MHz) spectrum of **3ac** in CDCl<sub>3</sub>

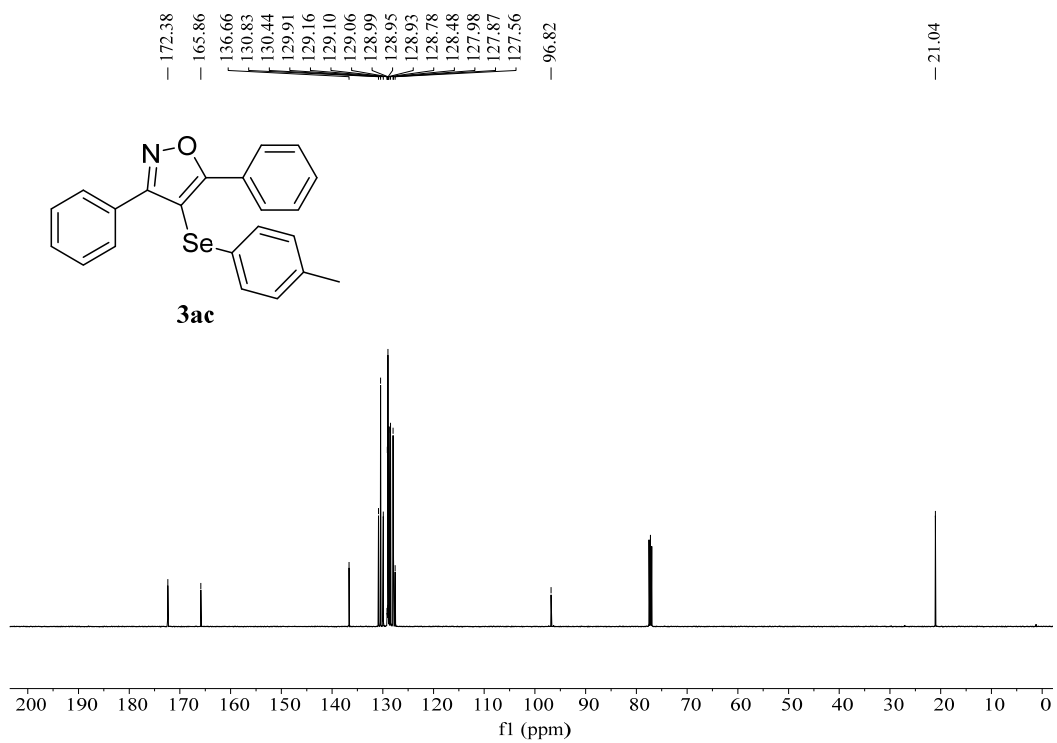

**Figure S16** <sup>13</sup>C NMR (125 MHz) spectrum of **3ac** in CDCl<sub>3</sub>

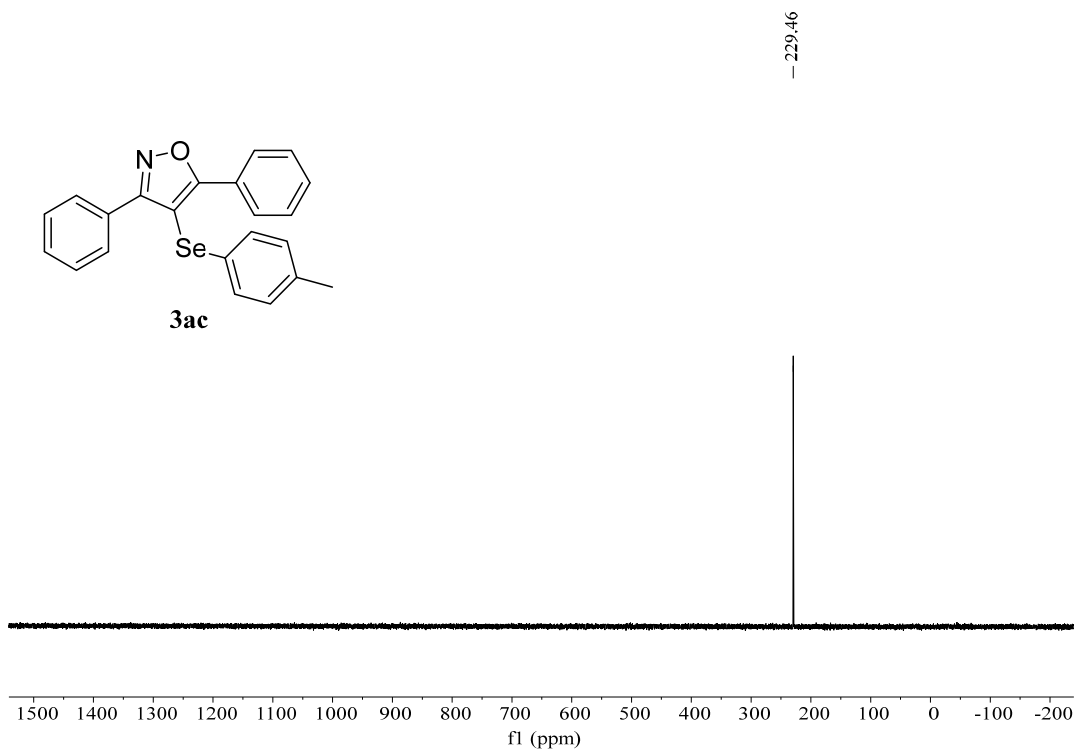

**Figure S17**  $^{77}\text{Se}$  NMR (95.5 MHz) spectrum of **3ac** in  $\text{CDCl}_3$

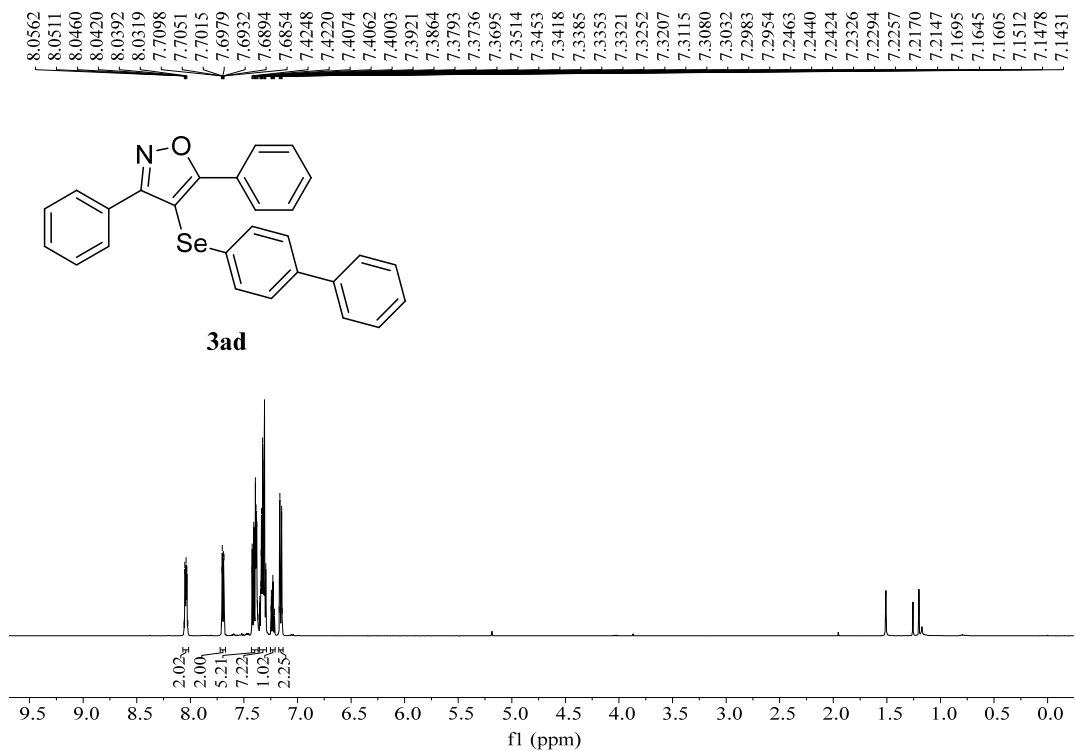

**Figure S18**  $^1\text{H}$  NMR (500 MHz) spectrum of **3ad** in  $\text{CDCl}_3$

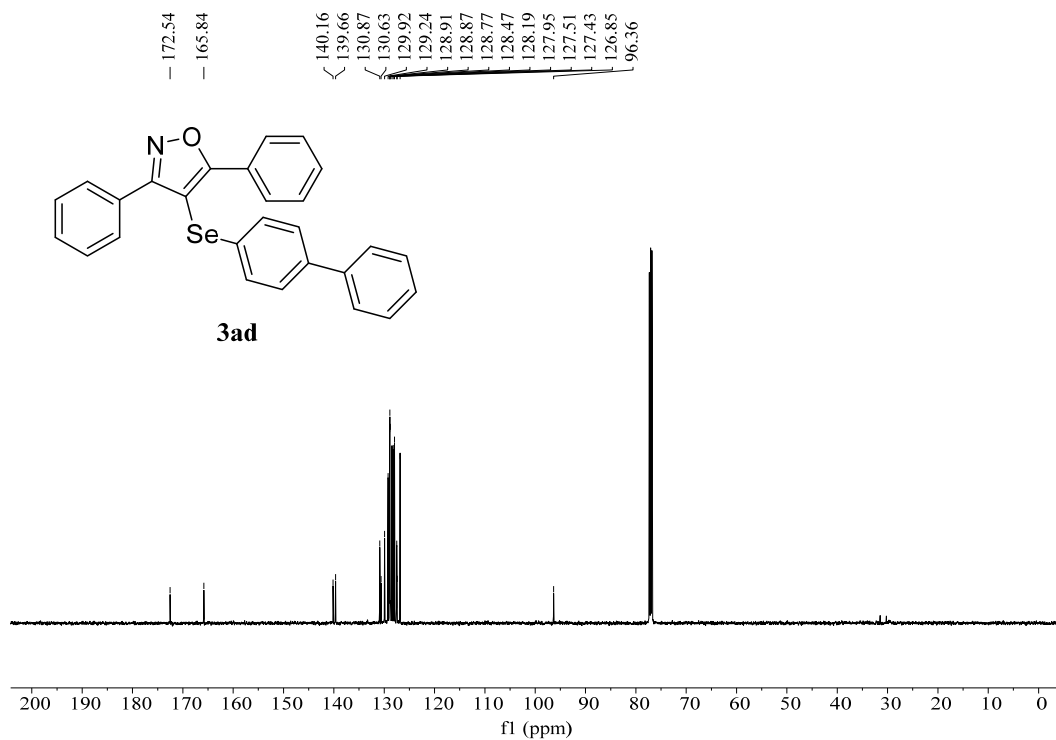

**Figure S19** <sup>13</sup>C NMR (125 MHz) spectrum of **3ad** in CDCl<sub>3</sub>

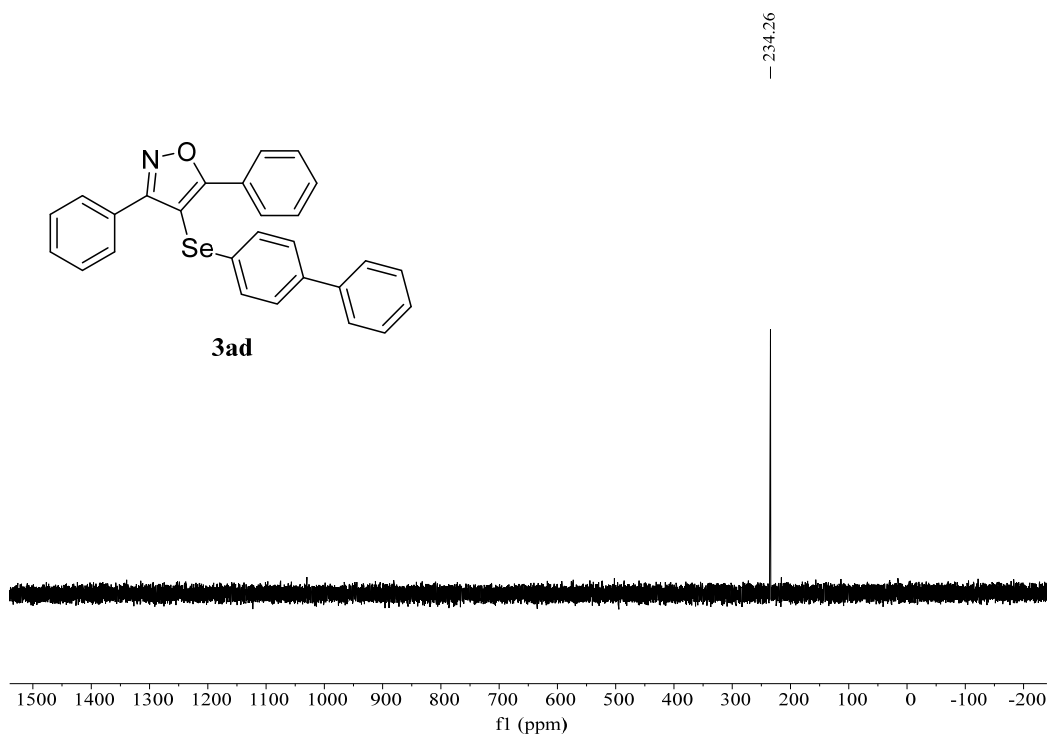

**Figure S20** <sup>77</sup>Se NMR (95.5 MHz) spectrum of **3ad** in CDCl<sub>3</sub>



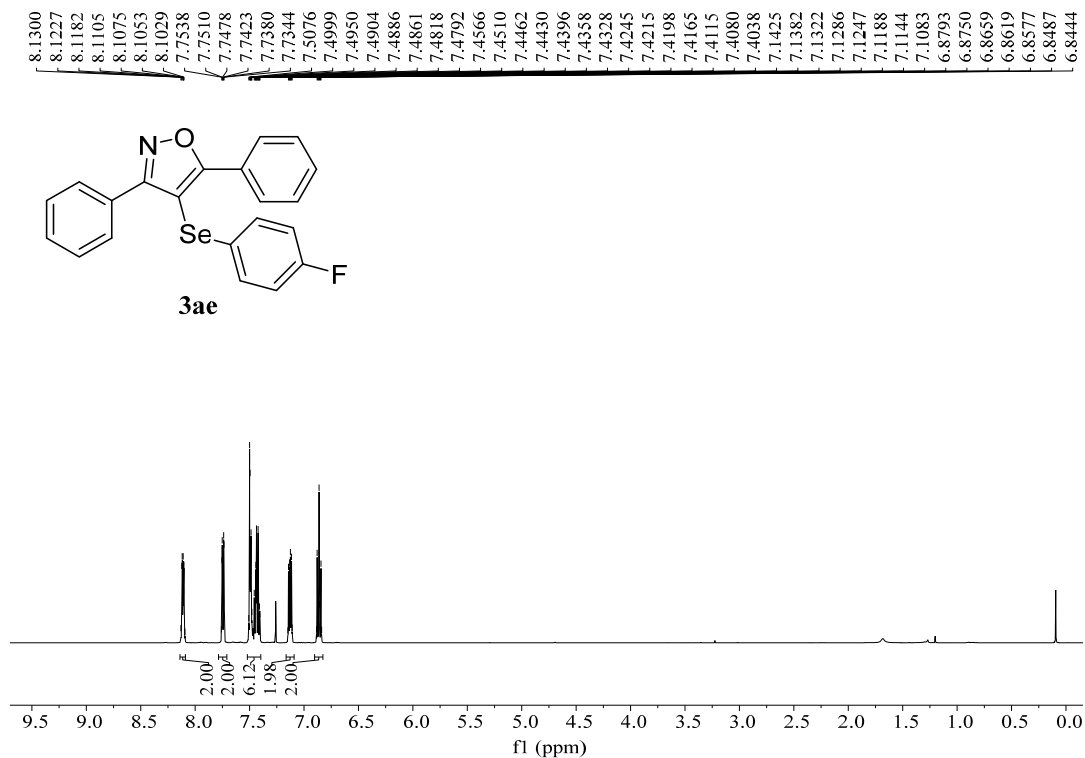

**Figure S21** <sup>1</sup>H NMR (500 MHz) spectrum of **3ae** in CDCl<sub>3</sub>

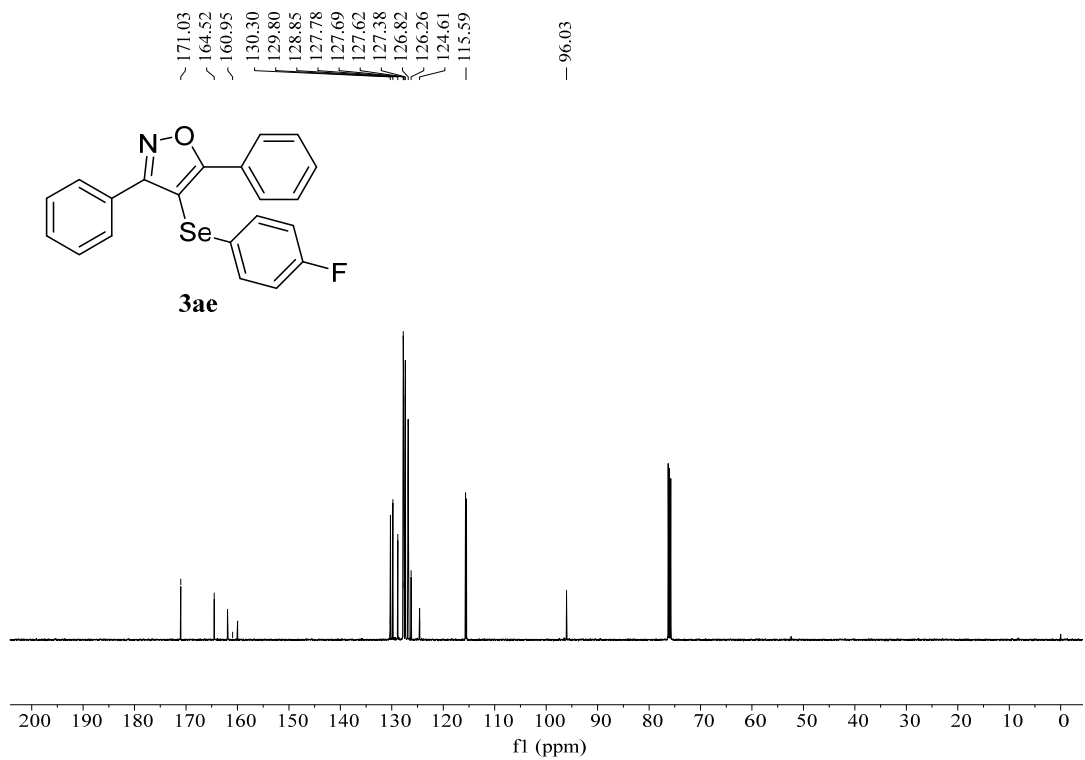

**Figure S22** <sup>13</sup>C NMR (125 MHz) spectrum of **3ae** in CDCl<sub>3</sub>

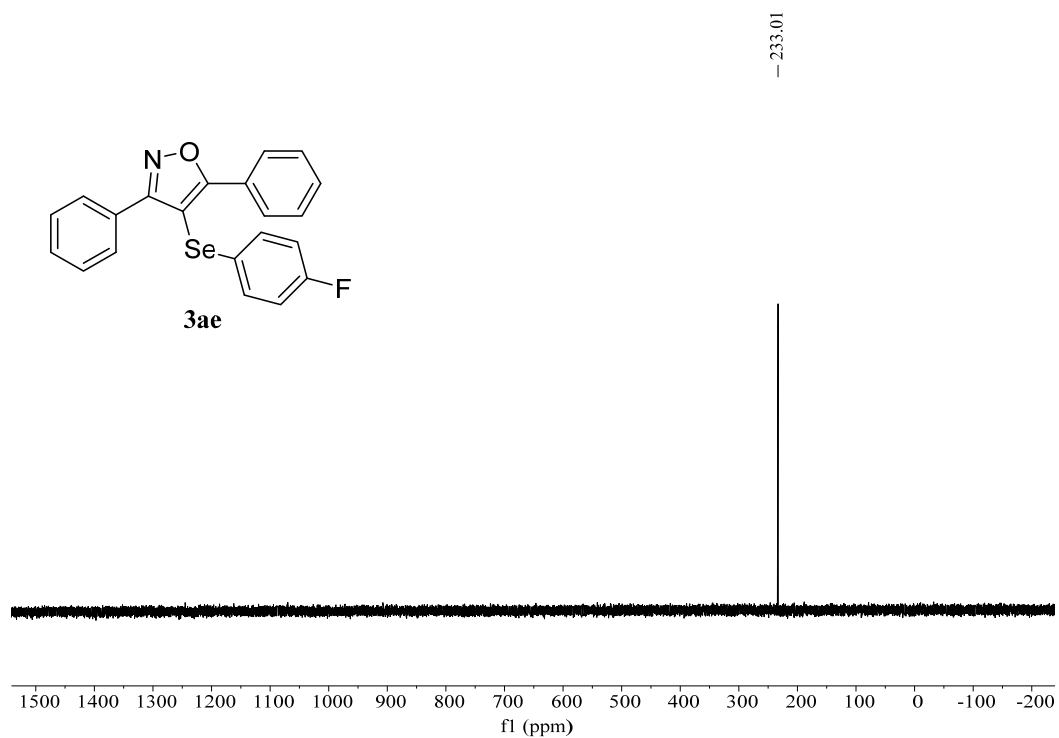

**Figure S23**  $^{77}\text{Se}$  NMR (95.5 MHz) spectrum of **3ae** in  $\text{CDCl}_3$

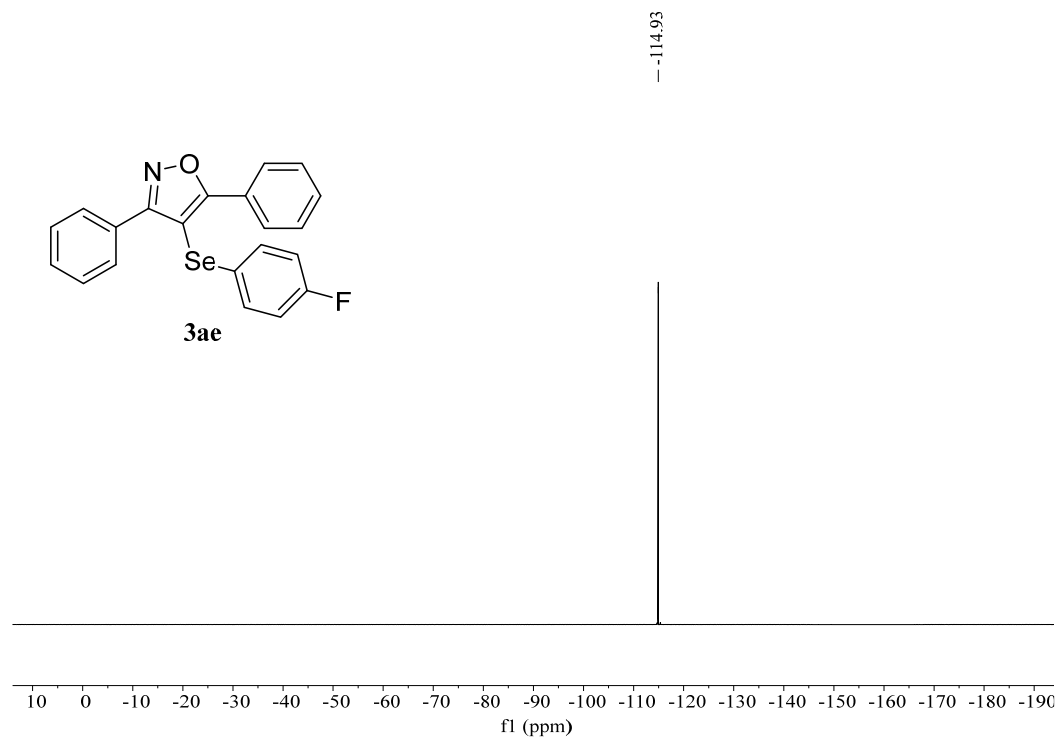

**Figure S24**  $^{19}\text{F}$  NMR (470 MHz) spectrum of **3ae** in  $\text{CDCl}_3$

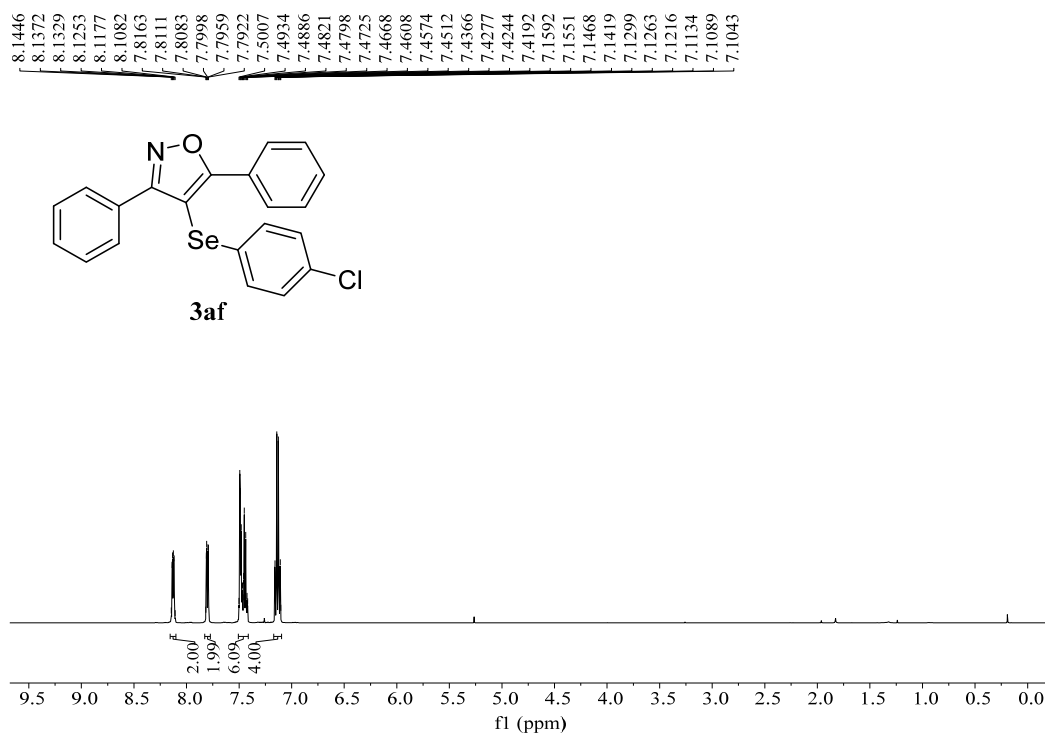

**Figure S25**  $^1\text{H}$  NMR (500 MHz) spectrum of **3af** in  $\text{CDCl}_3$

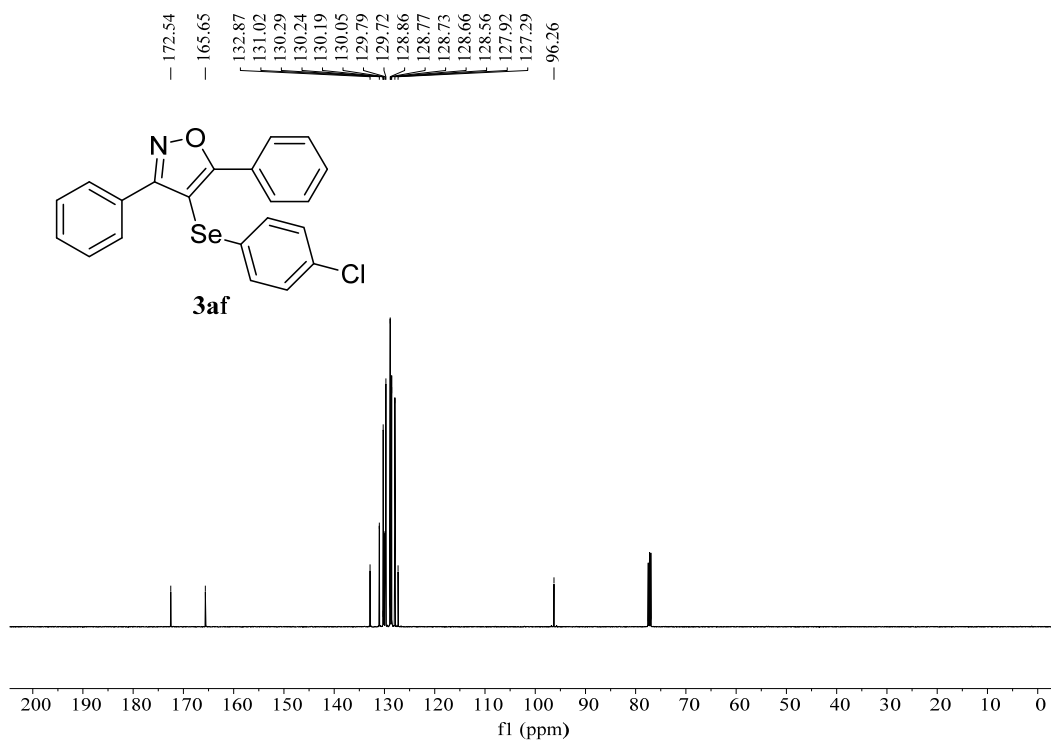

**Figure S26**  $^{13}\text{C}$  NMR (125 MHz) spectrum of **3af** in  $\text{CDCl}_3$

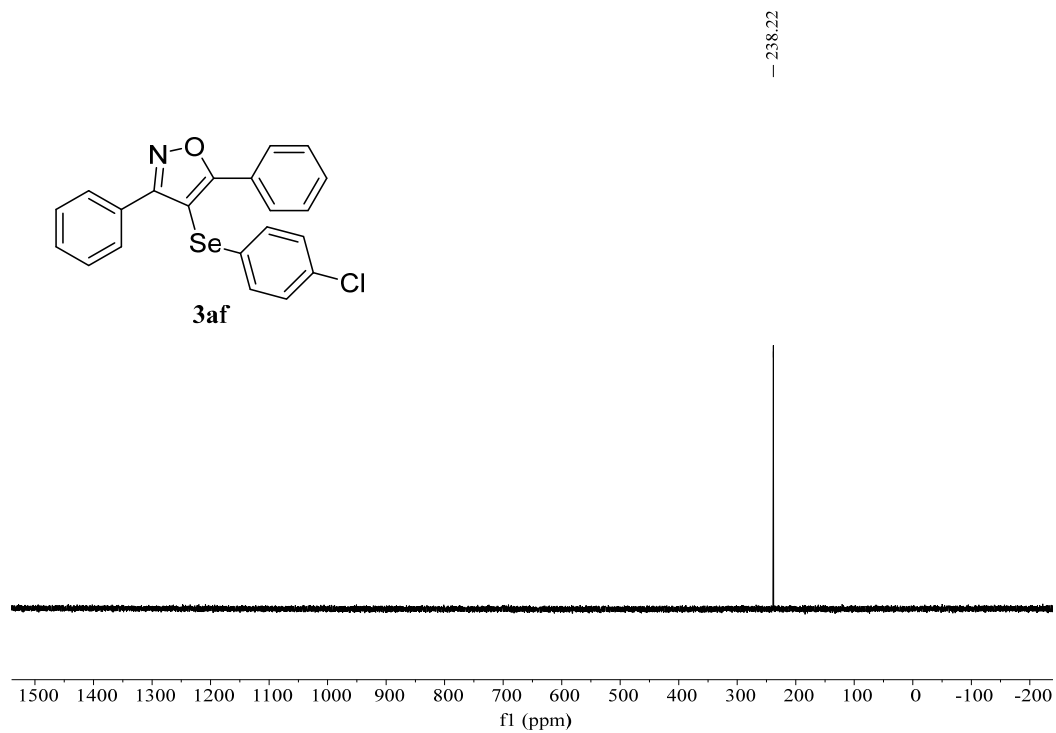

**Figure S27**  $^{77}\text{Se}$  NMR (95.5 MHz) spectrum of **3af** in  $\text{CDCl}_3$

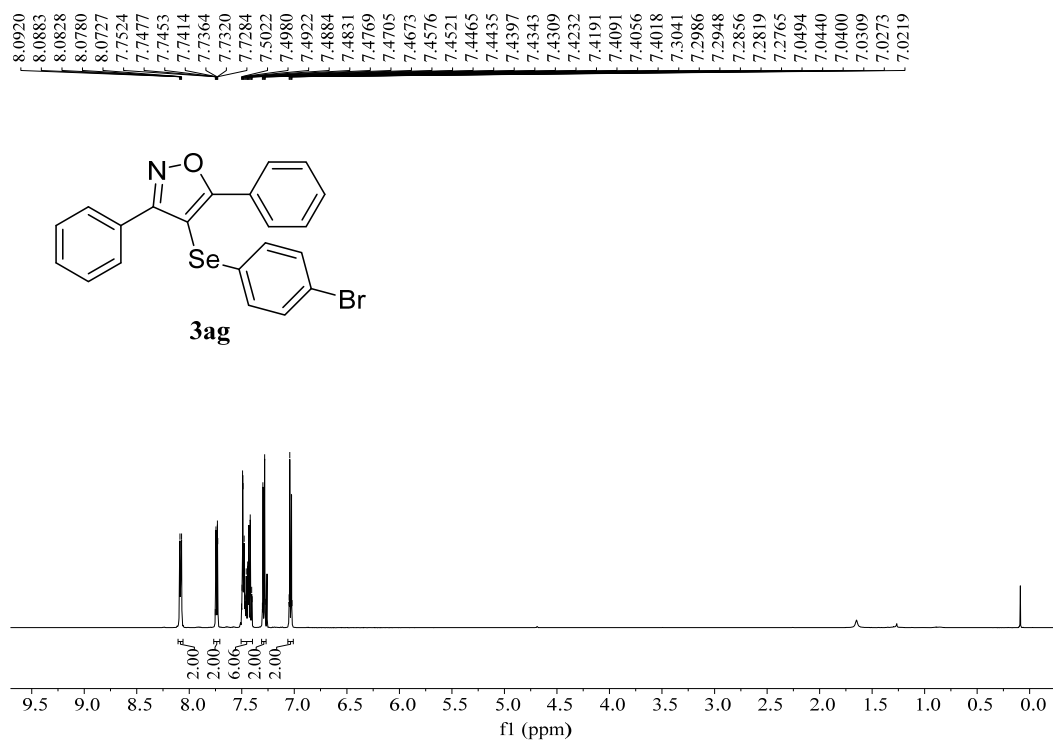

**Figure S28**  $^1\text{H}$  NMR (500 MHz) spectrum of **3ag** in  $\text{CDCl}_3$

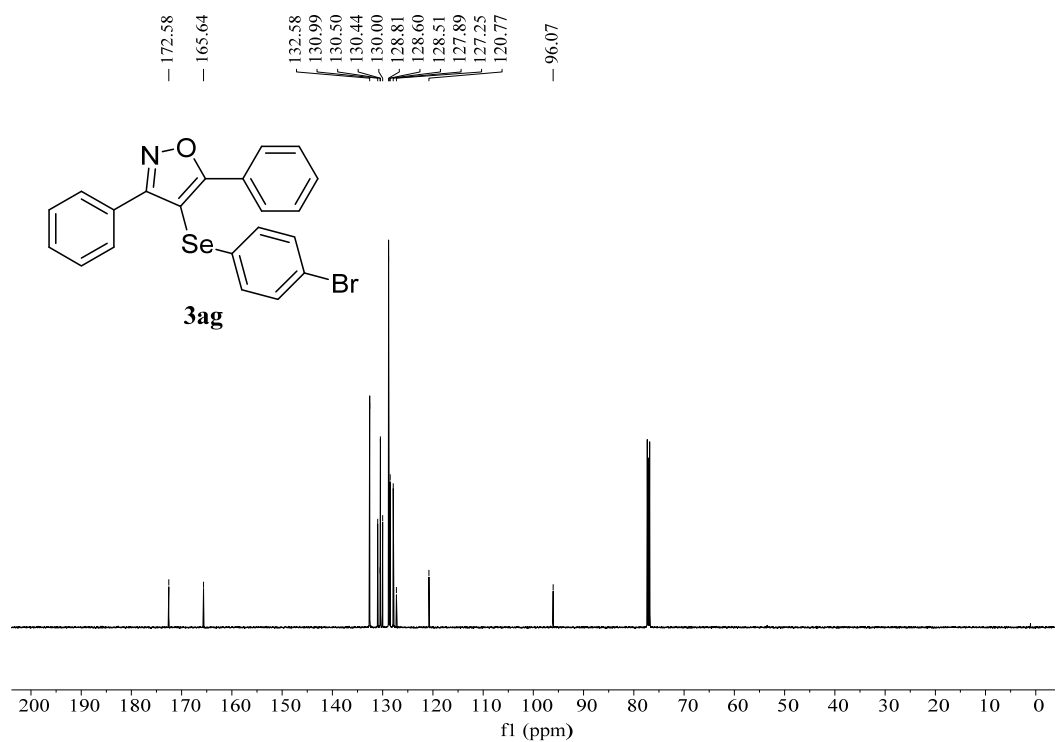

**Figure S29**  $^{13}\text{C}$  NMR (125 MHz) spectrum of **3ag** in  $\text{CDCl}_3$

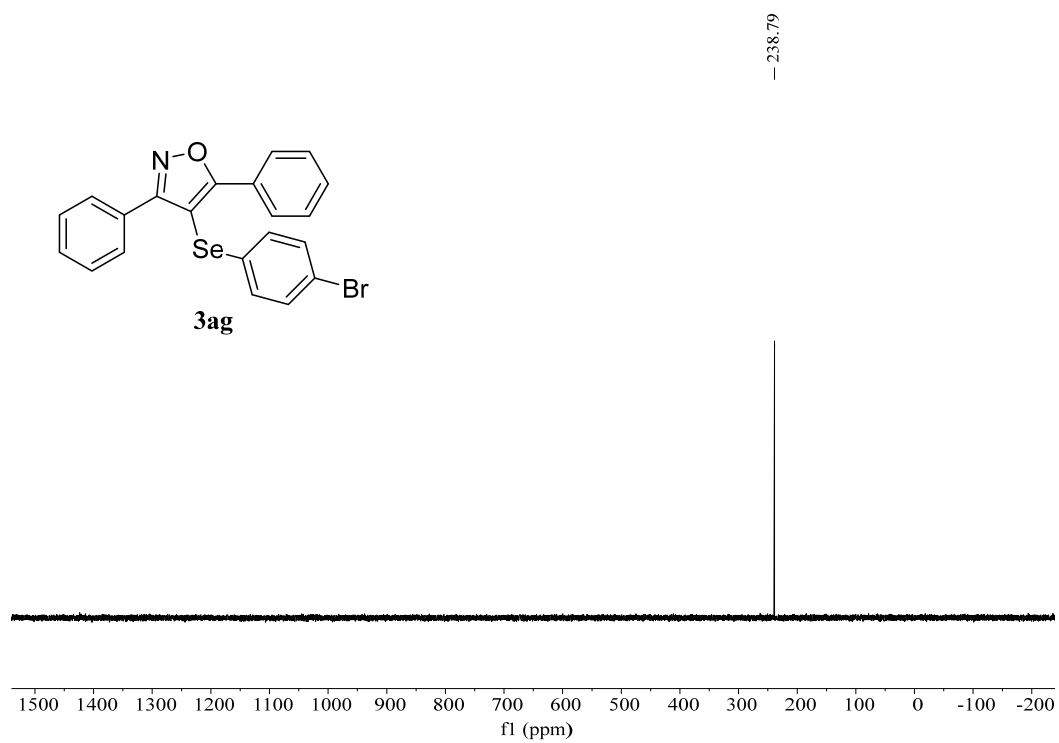

**Figure S30**  $^{77}\text{Se}$  NMR (95.5 MHz) spectrum of **3ag** in  $\text{CDCl}_3$

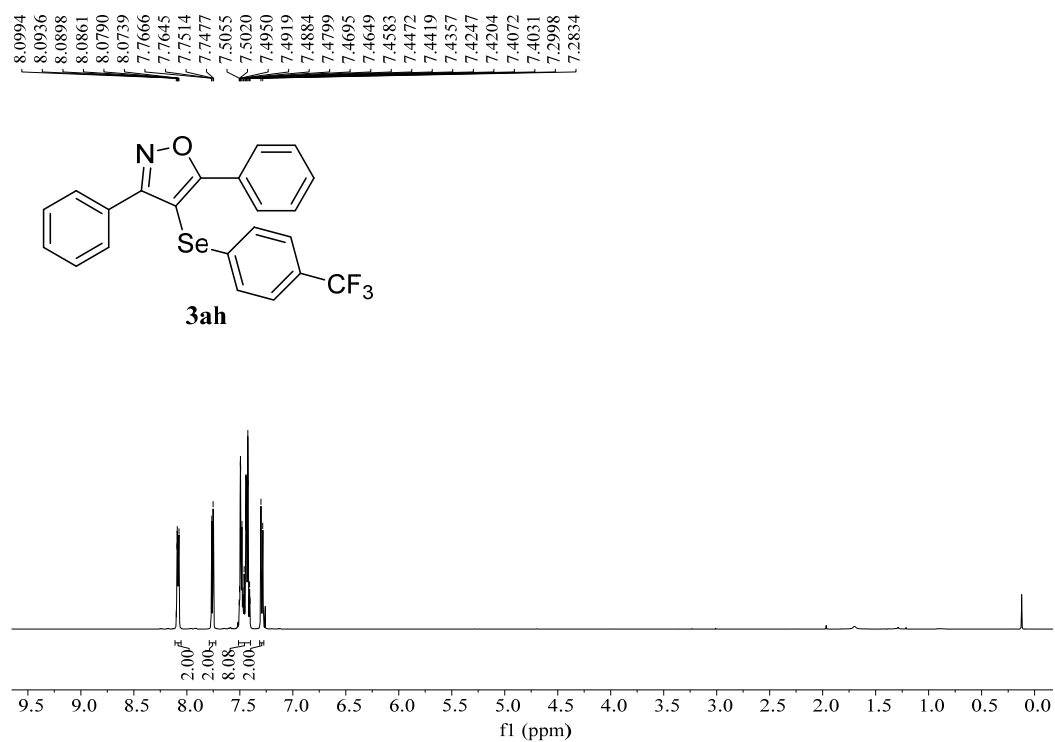

**Figure S31** <sup>1</sup>H NMR (500 MHz) spectrum of **3ah** in CDCl<sub>3</sub>

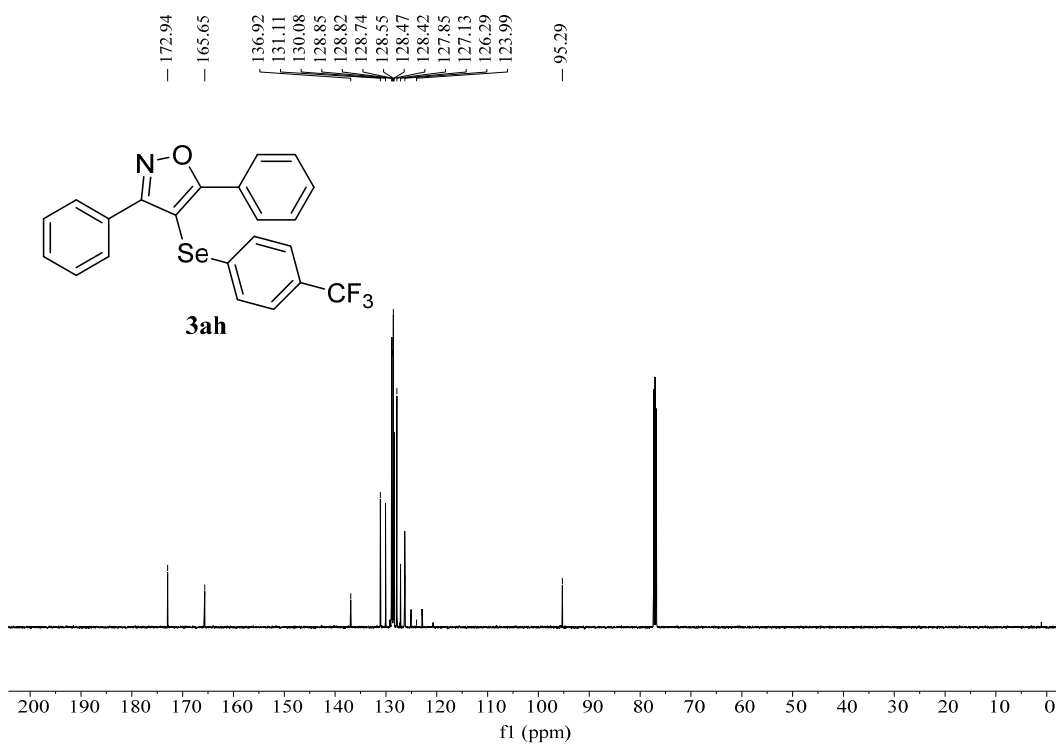

**Figure S32** <sup>13</sup>C NMR (125 MHz) spectrum of **3ah** in CDCl<sub>3</sub>

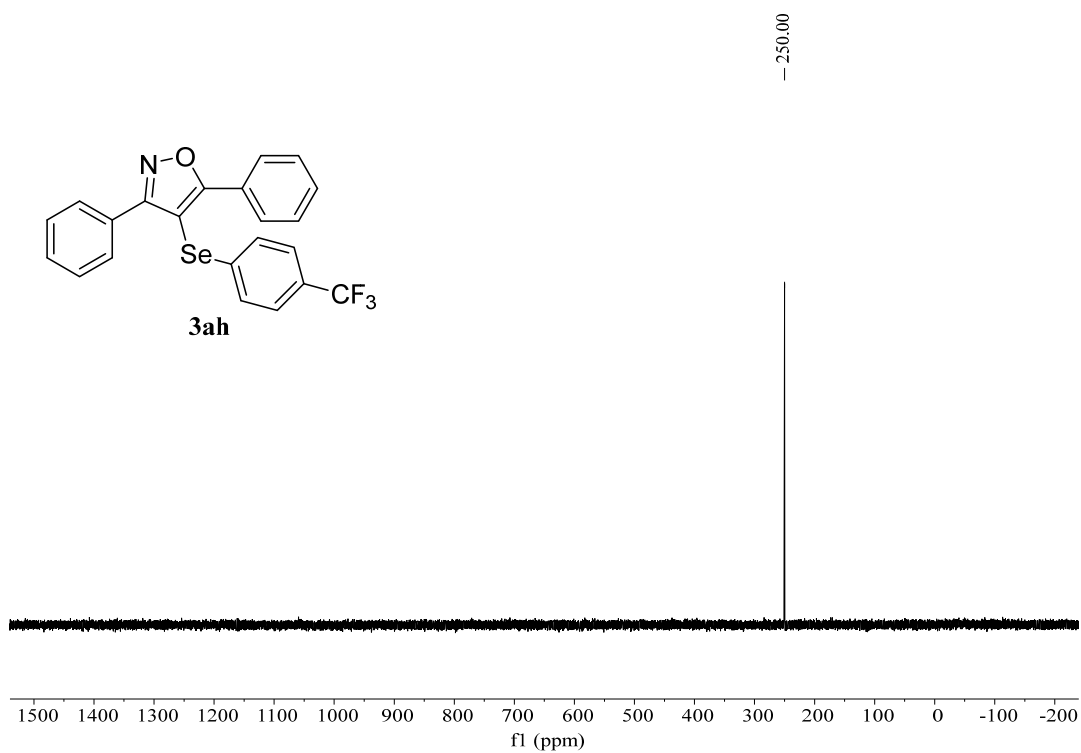

**Figure S33**  $^{77}\text{Se}$  NMR (95.5 MHz) spectrum of **3ah** in  $\text{CDCl}_3$

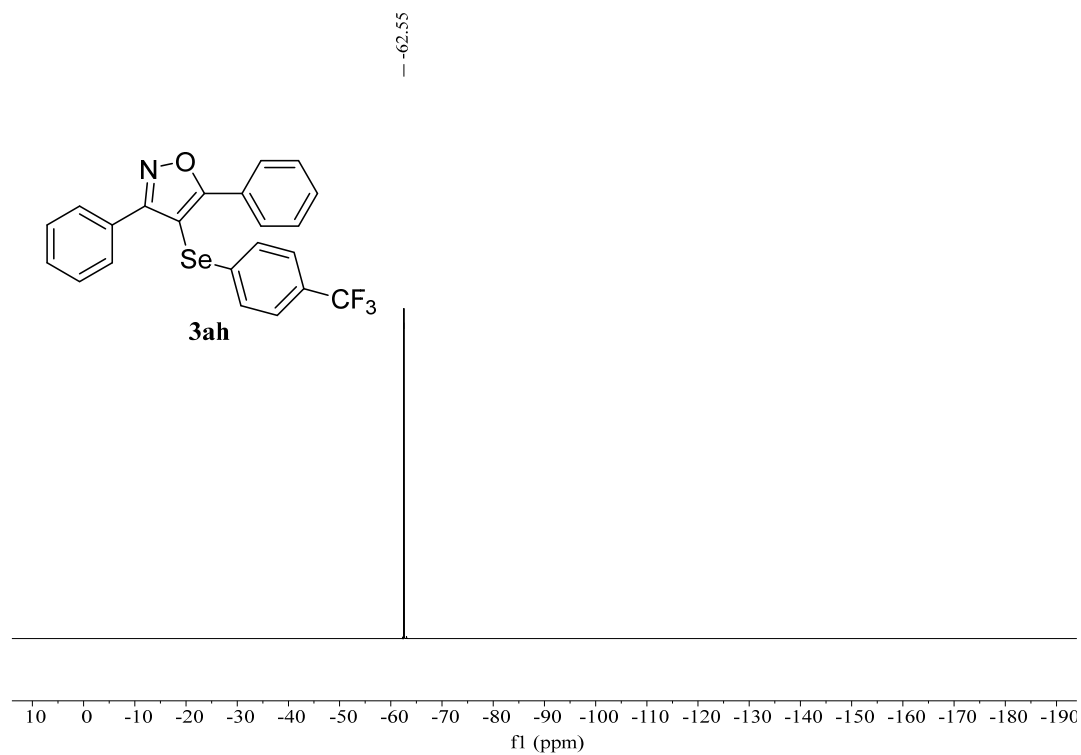

**Figure S34**  $^{19}\text{F}$  NMR (470 MHz) spectrum of **3ah** in  $\text{CDCl}_3$

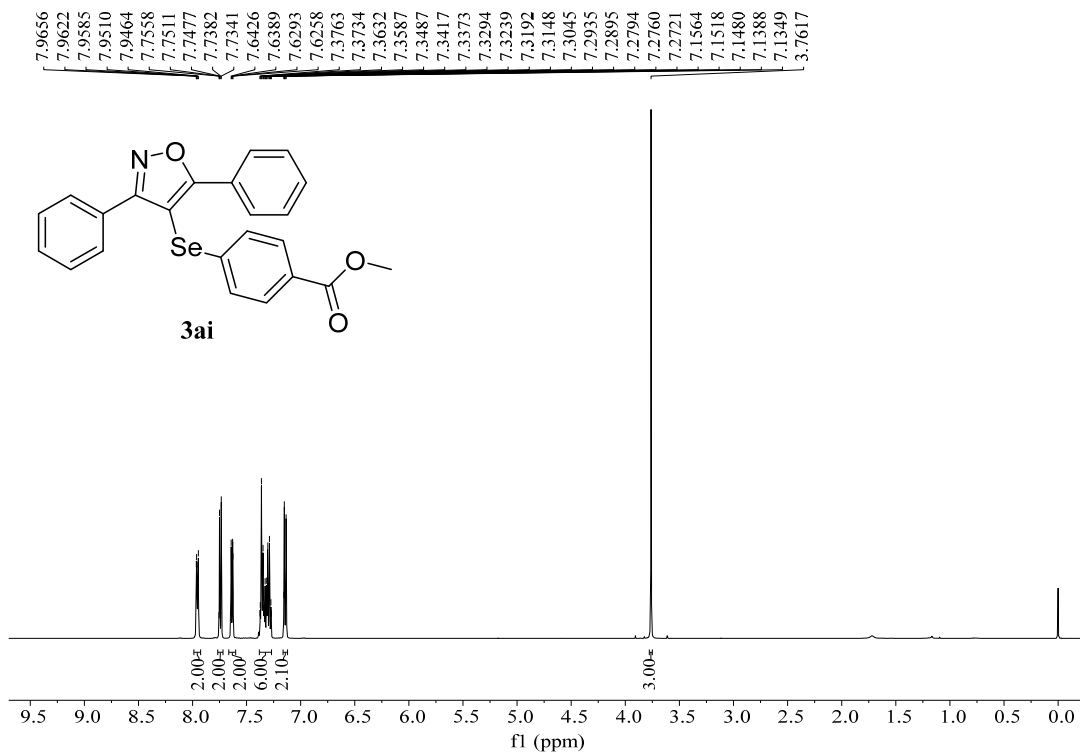

Figure S35 <sup>1</sup>H NMR (500 MHz) spectrum of **3ai** in CDCl<sub>3</sub>

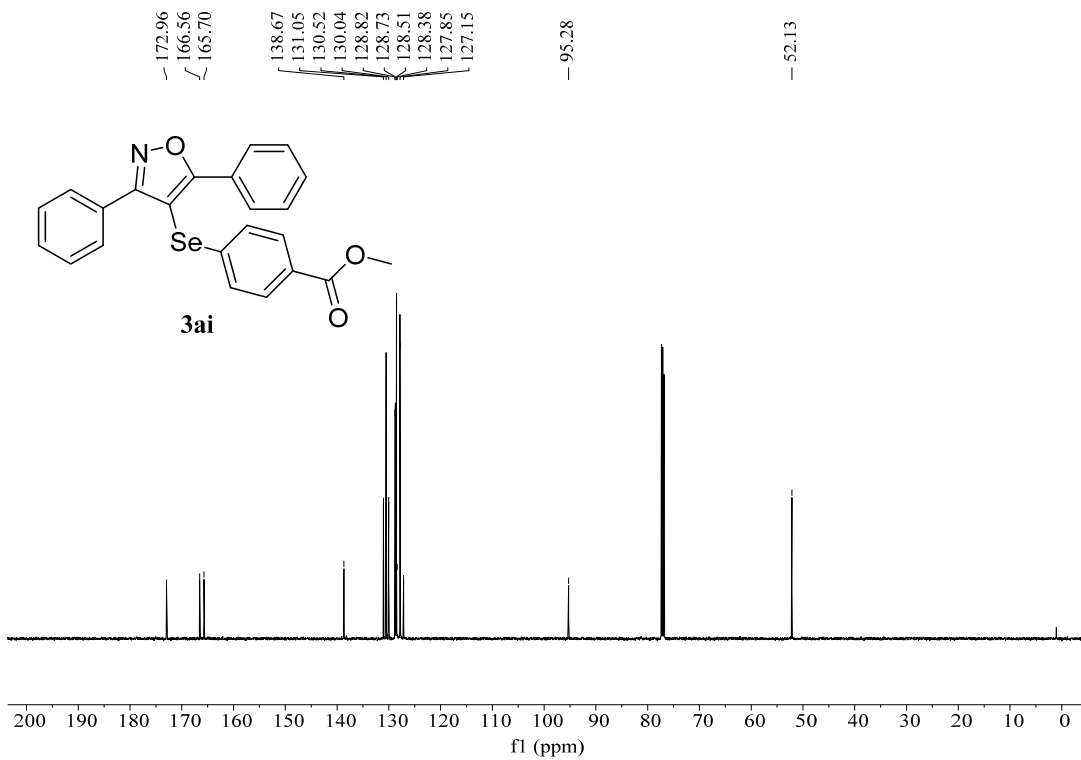

Figure S36 <sup>13</sup>C NMR (125 MHz) spectrum of **3ai** in CDCl<sub>3</sub>



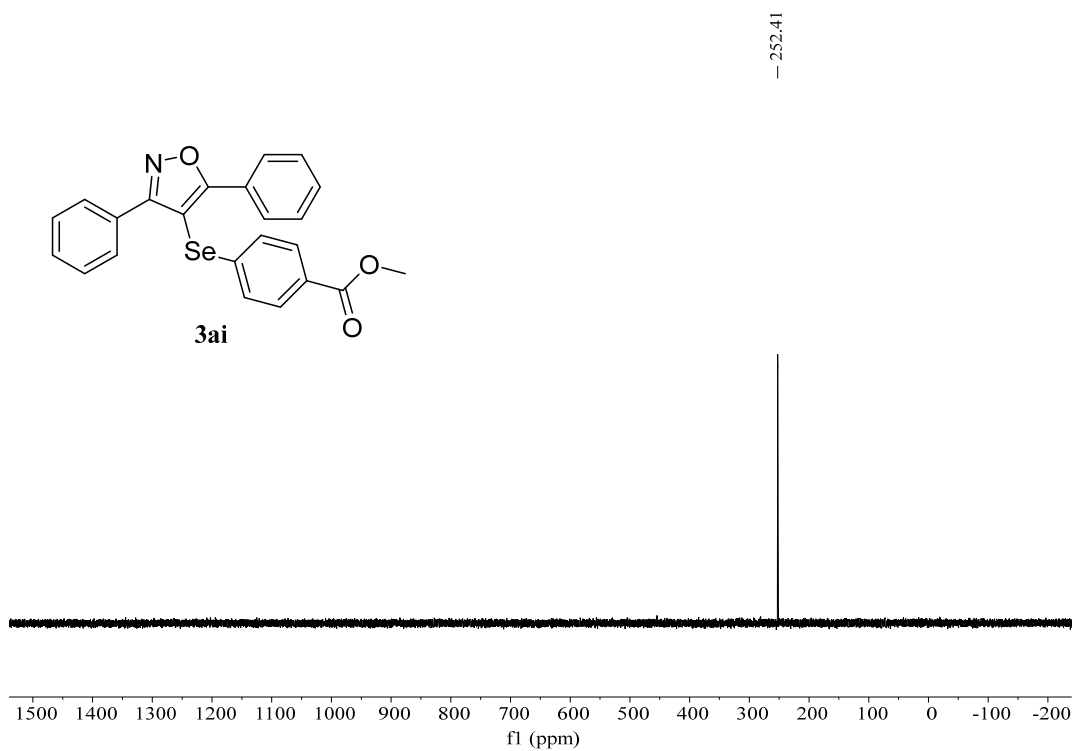

**Figure S37**  $^{77}\text{Se}$  NMR (95.5 MHz) spectrum of **3ai** in  $\text{CDCl}_3$

8.0662  
8.0609  
8.0575  
8.0537  
8.0489  
8.0452  
8.0409  
7.7478  
7.7432  
7.7408  
7.7380  
7.7314  
7.7276  
7.7241  
7.5171  
7.5157  
7.5108  
7.5071  
7.5032  
7.5008  
7.4918  
7.4885  
7.4861  
7.4794  
7.4769  
7.4730  
7.4715  
7.4687  
7.4643  
7.4593  
7.4511  
7.4477  
7.4344  
7.4252  
7.4214  
7.4114  
7.4076  
7.4043  
7.2867  
7.2828  
7.2788  
7.2767  
7.2691  
7.2657  
7.2612

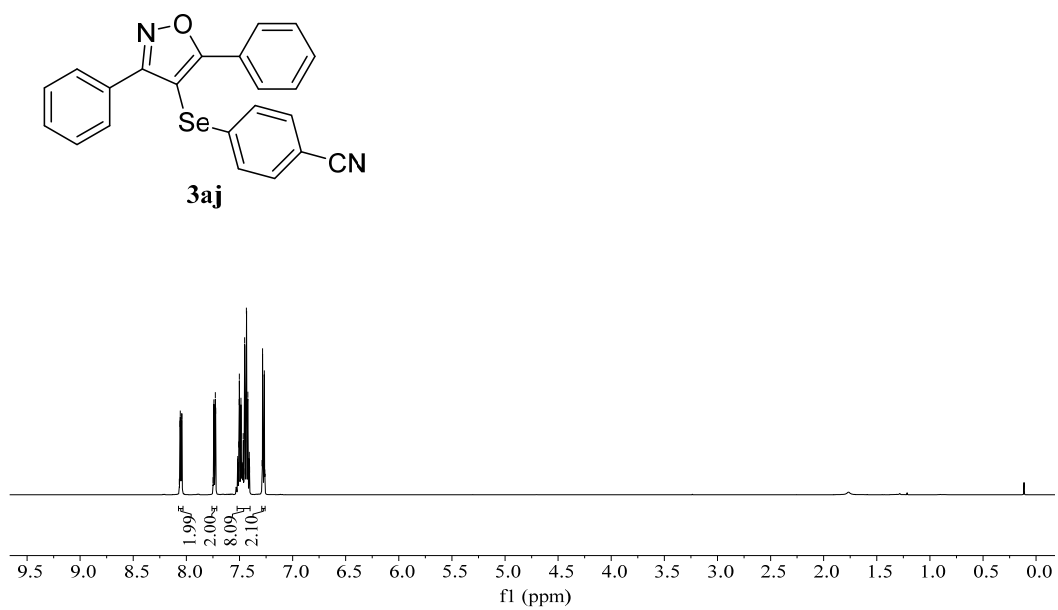

**Figure S38**  $^1\text{H}$  NMR (500 MHz) spectrum of **3aj** in  $\text{CDCl}_3$

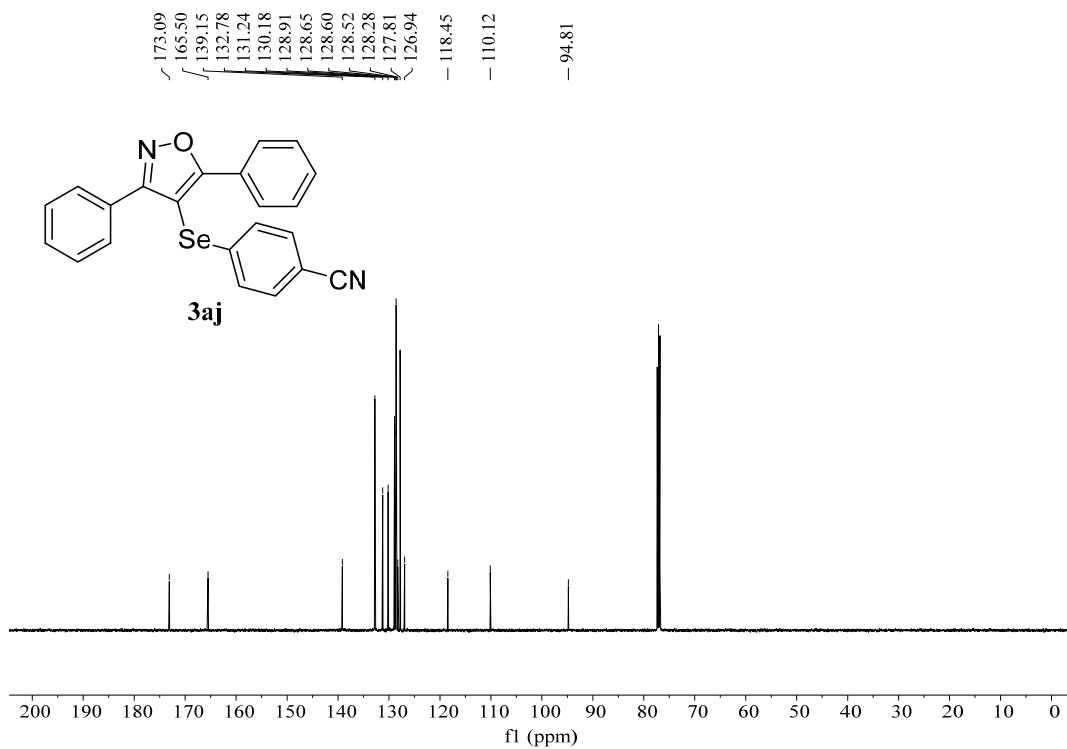

**Figure S39** <sup>13</sup>C NMR (125 MHz) spectrum of **3aj** in CDCl<sub>3</sub>

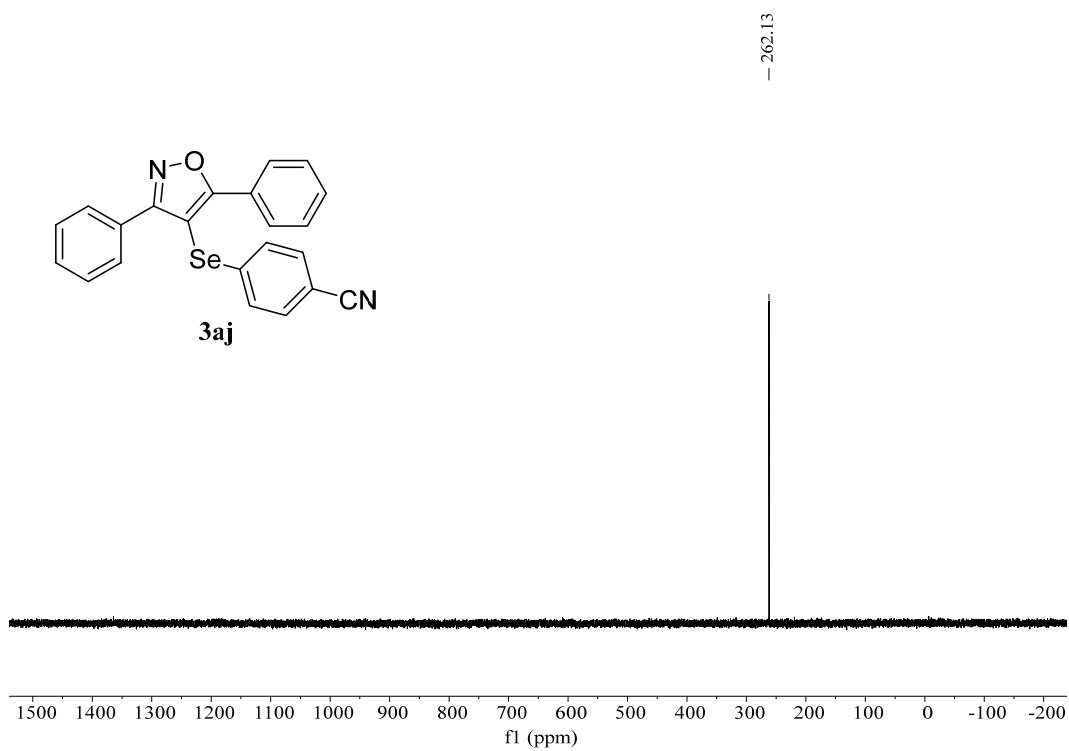

**Figure S40** <sup>77</sup>Se NMR (95.5 MHz) spectrum of **3aj** in CDCl<sub>3</sub>

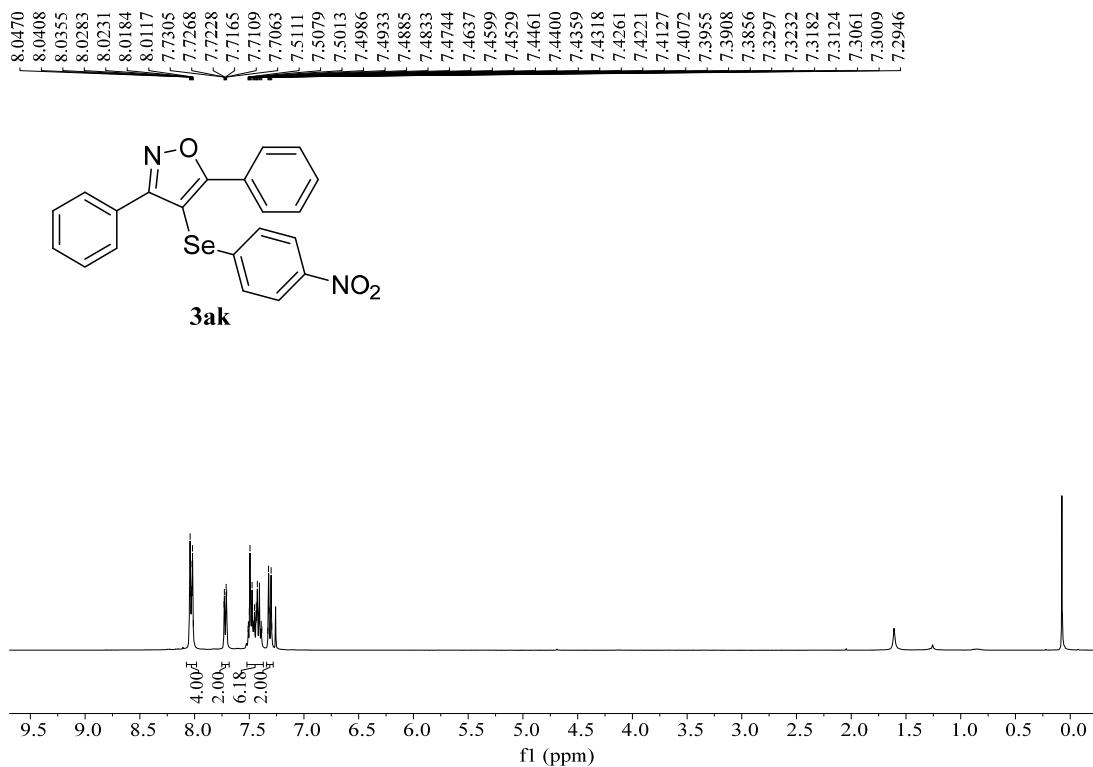

**Figure S41**  $^1\text{H}$  NMR (500 MHz) spectrum of **3ak** in  $\text{CDCl}_3$

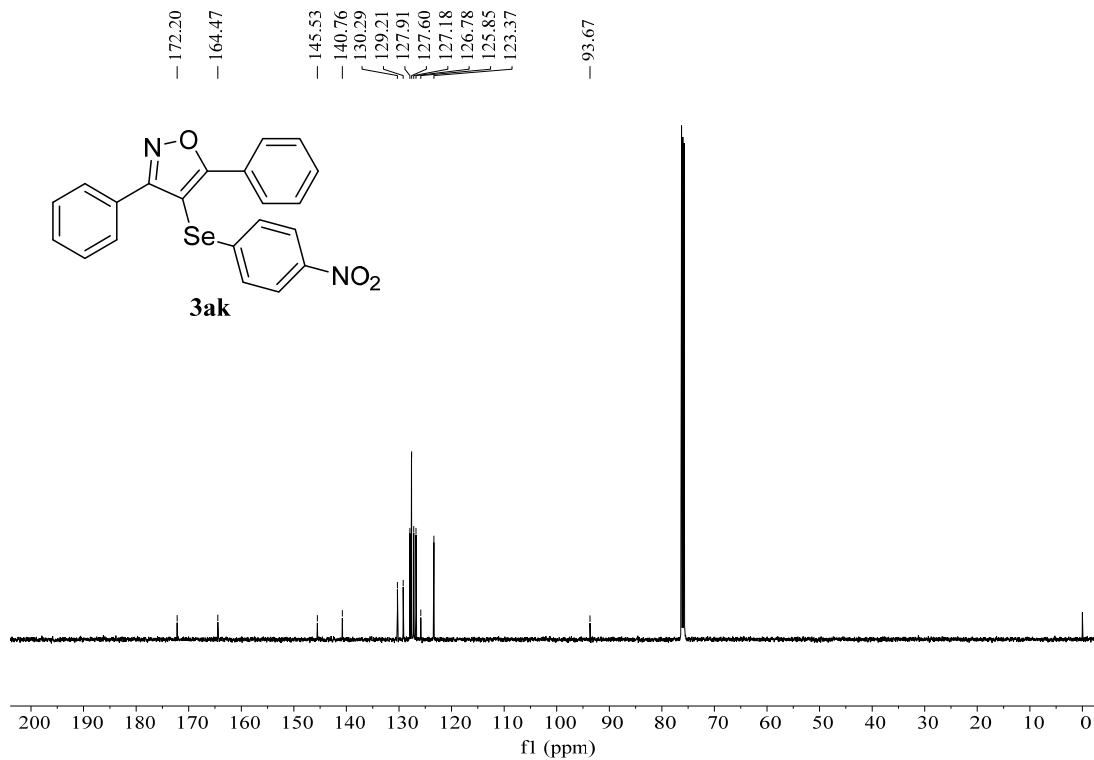

**Figure S42**  $^{13}\text{C}$  NMR (125 MHz) spectrum of **3ak** in  $\text{CDCl}_3$

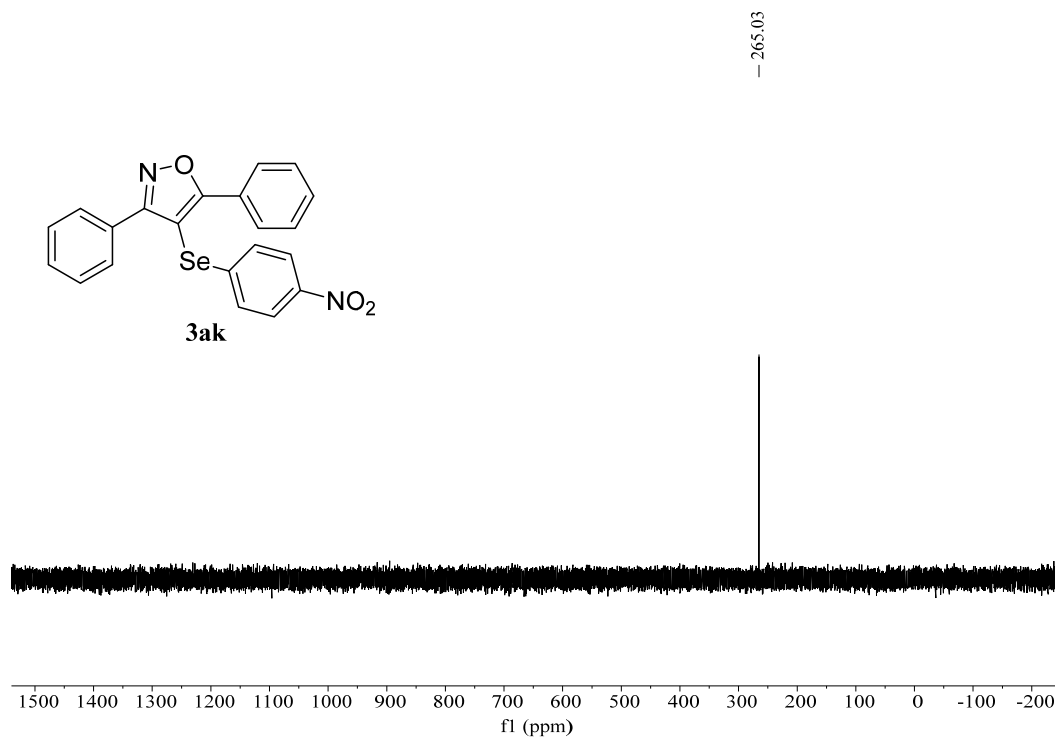

**Figure S43**  $^{77}\text{Se}$  NMR (95.5 MHz) spectrum of **3ak** in  $\text{CDCl}_3$

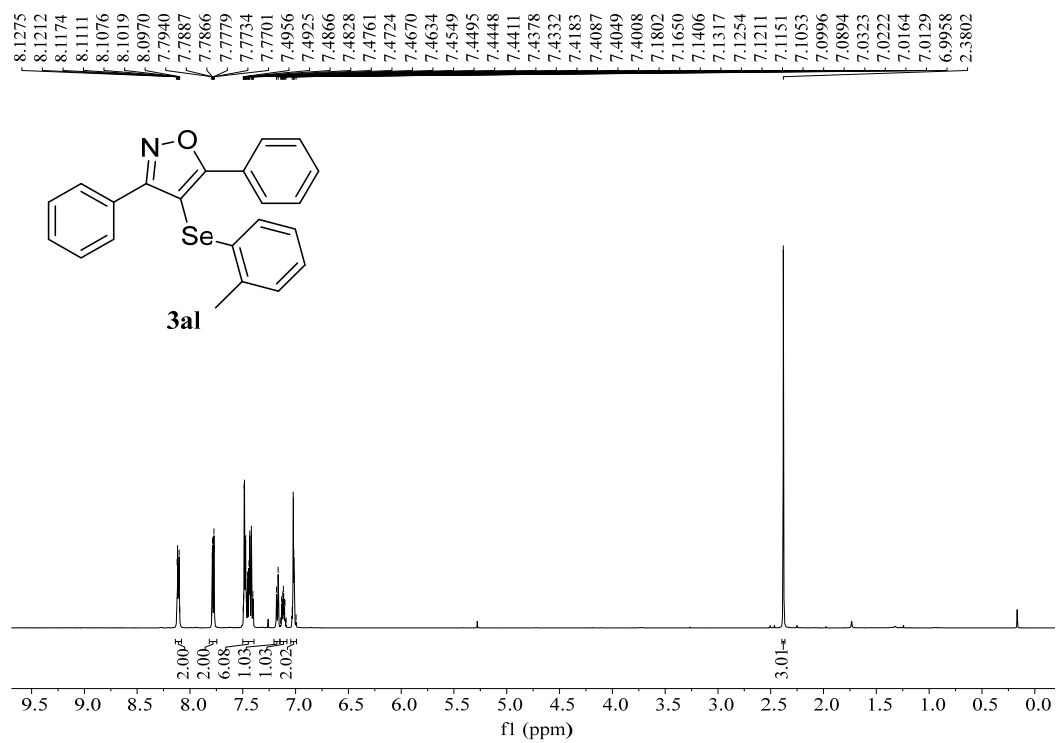

**Figure S44**  $^1\text{H}$  NMR (500 MHz) spectrum of **3al** in  $\text{CDCl}_3$

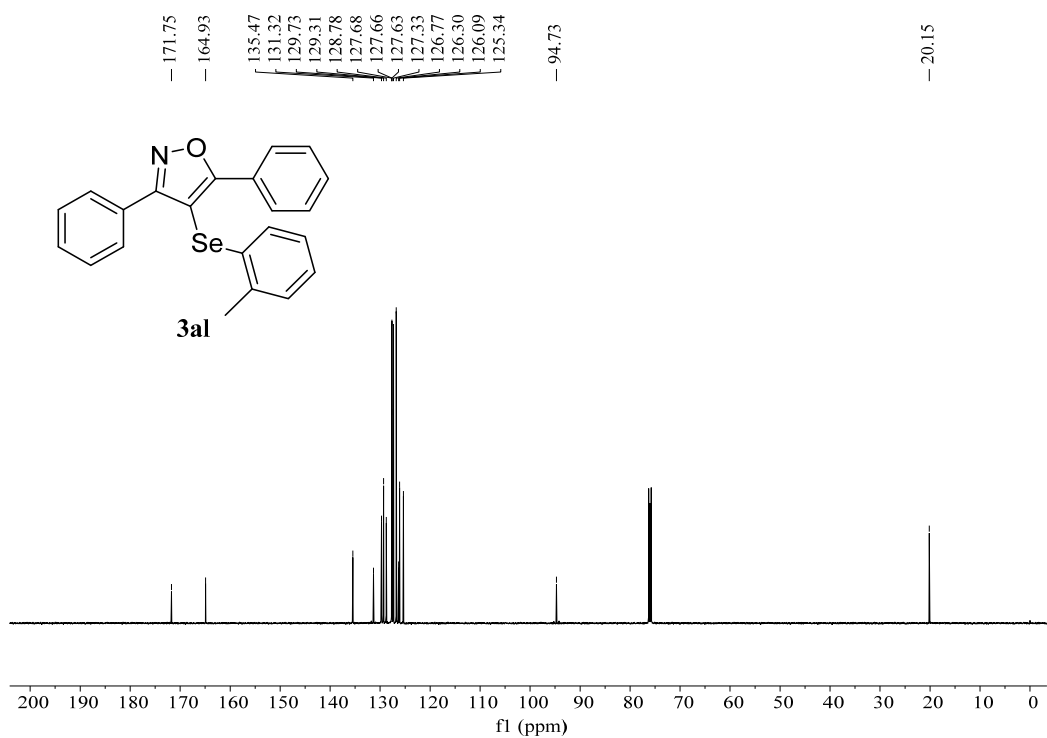

**Figure S45**  $^{13}\text{C}$  NMR (125 MHz) spectrum of **3al** in  $\text{CDCl}_3$

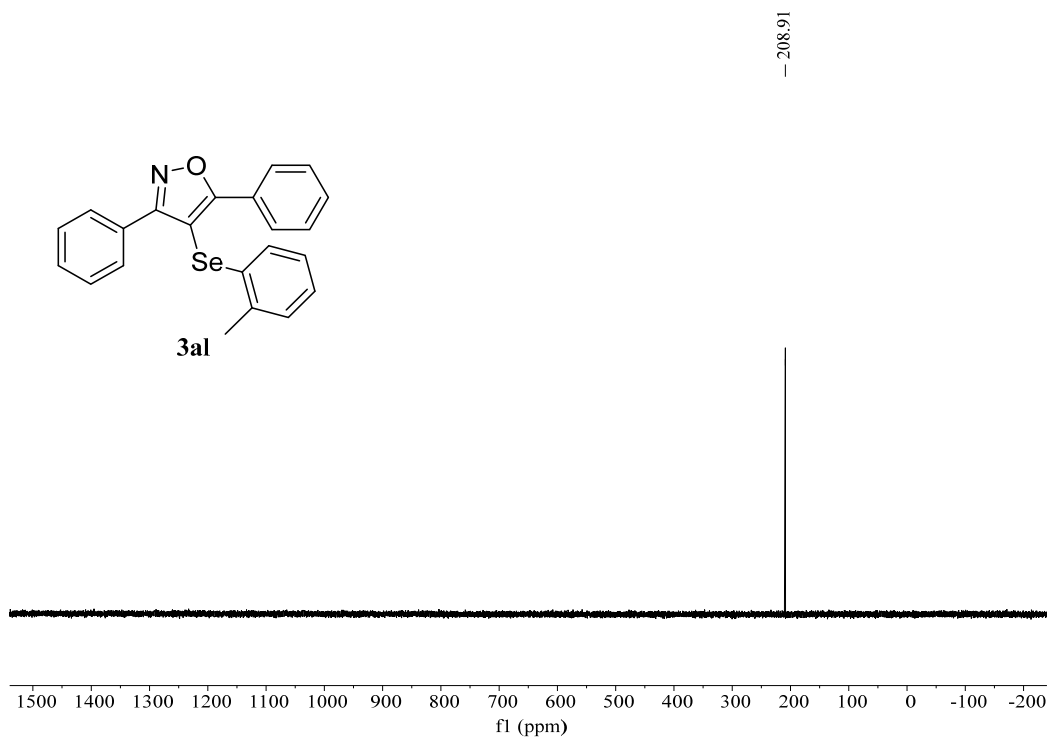

**Figure S46**  $^{77}\text{Se}$  NMR (95.5 MHz) spectrum of **3al** in  $\text{CDCl}_3$

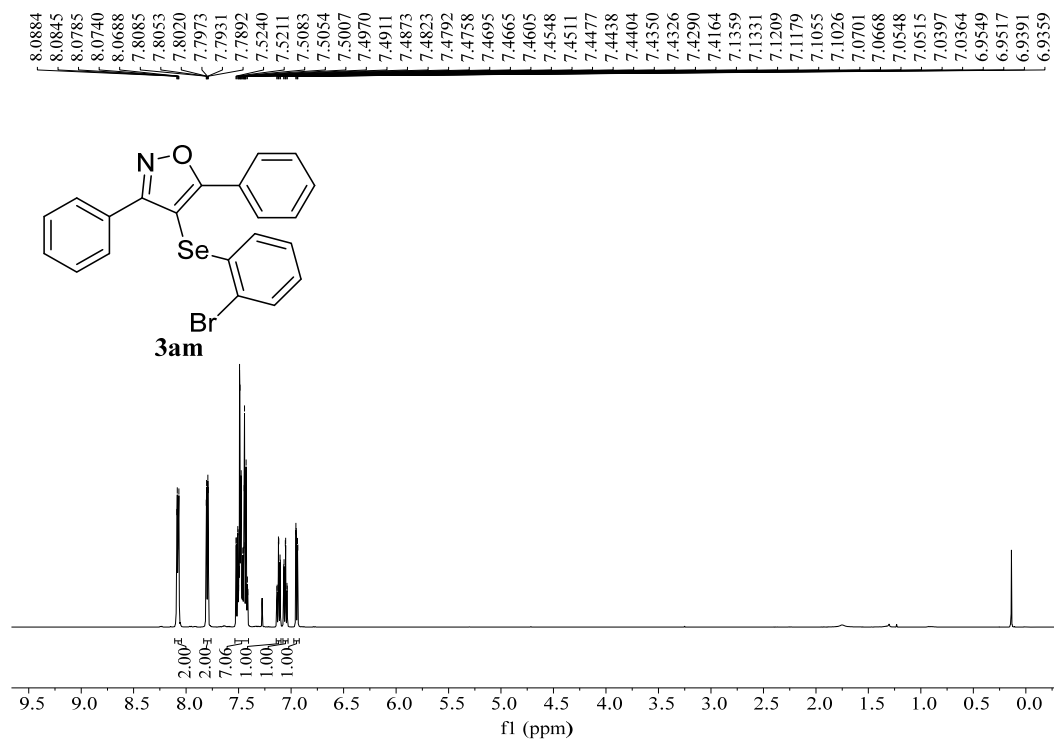

Figure S47 <sup>1</sup>H NMR (500 MHz) spectrum of **3am** in CDCl<sub>3</sub>

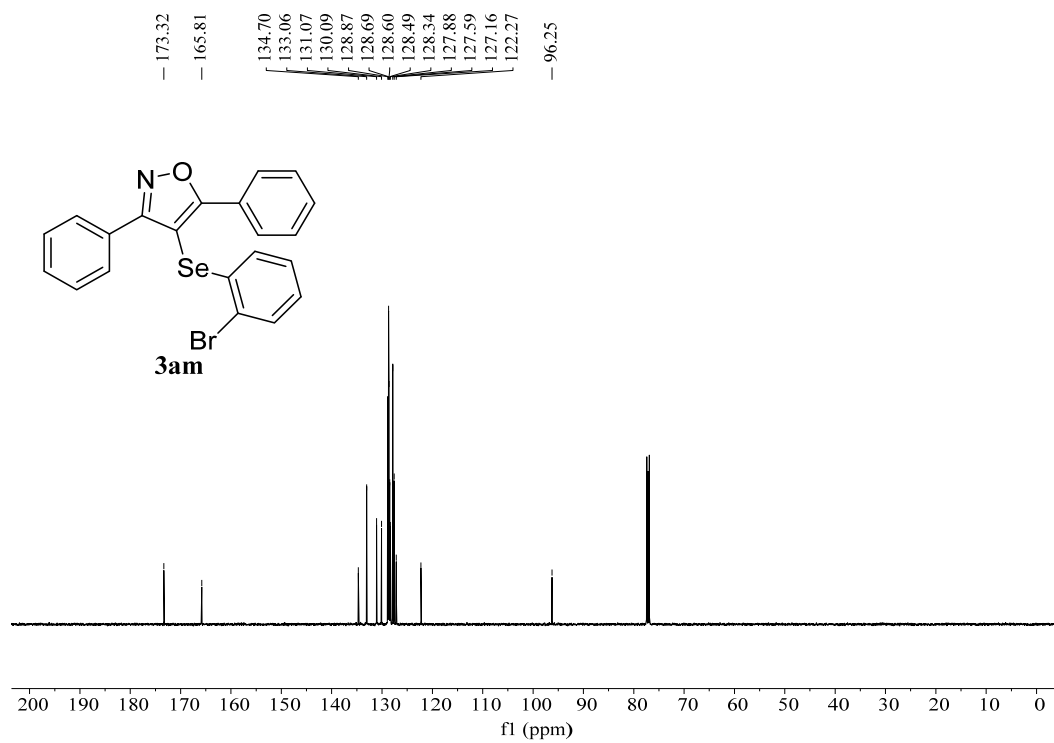

Figure S48 <sup>13</sup>C NMR (125 MHz) spectrum of **3am** in CDCl<sub>3</sub>

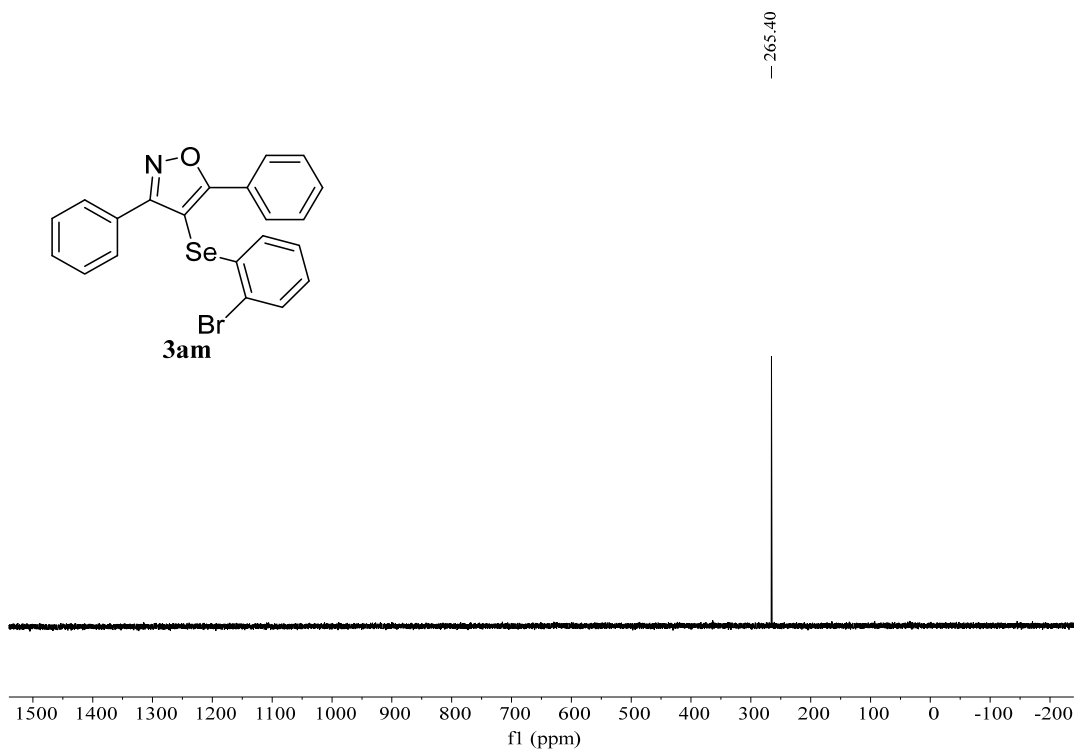

**Figure S49**  $^{77}\text{Se}$  NMR (95.5 MHz) spectrum of **3am** in  $\text{CDCl}_3$

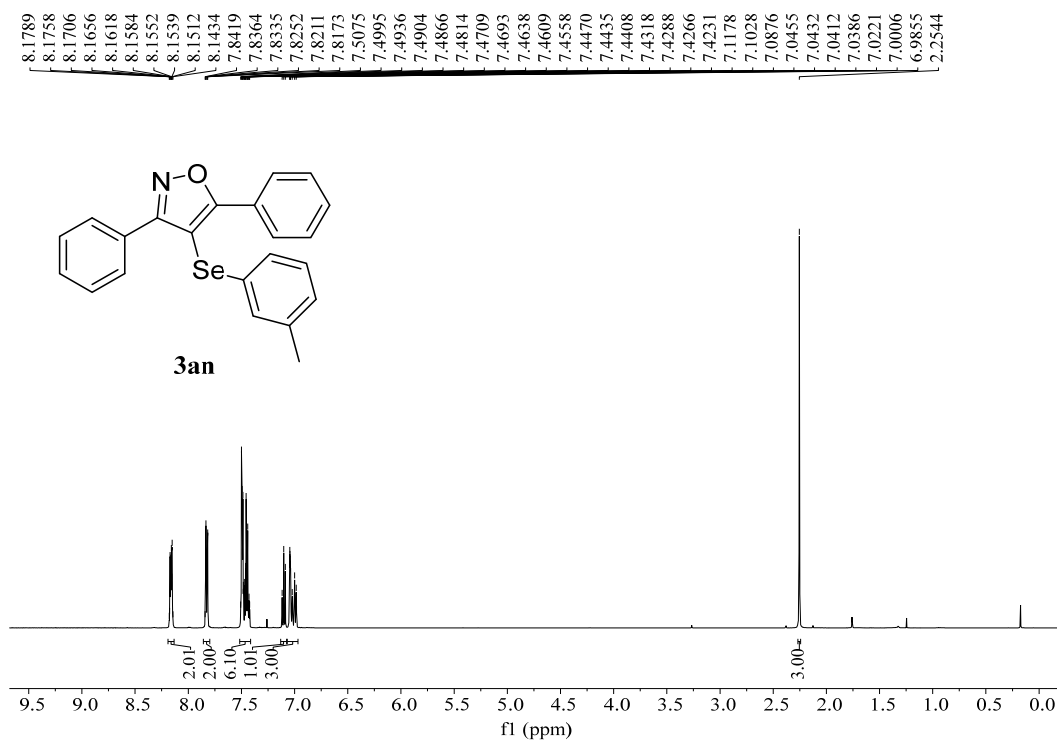

**Figure S50**  $^1\text{H}$  NMR (500 MHz) spectrum of **3an** in  $\text{CDCl}_3$

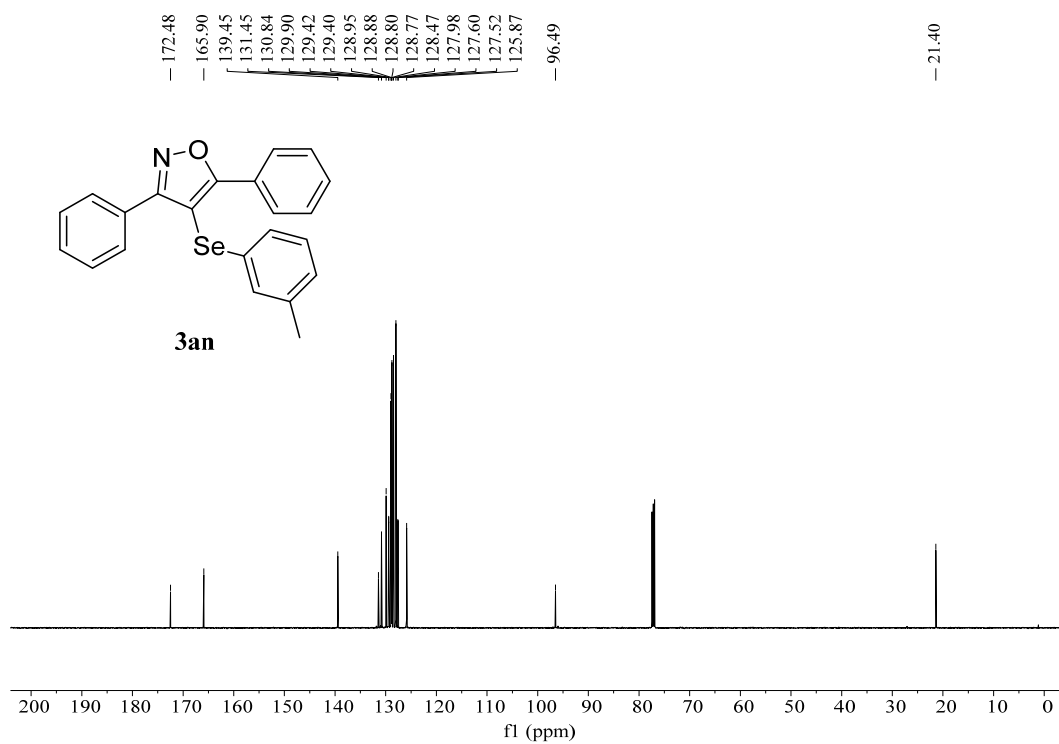

**Figure S51** <sup>13</sup>C NMR (125 MHz) spectrum of **3an** in CDCl<sub>3</sub>

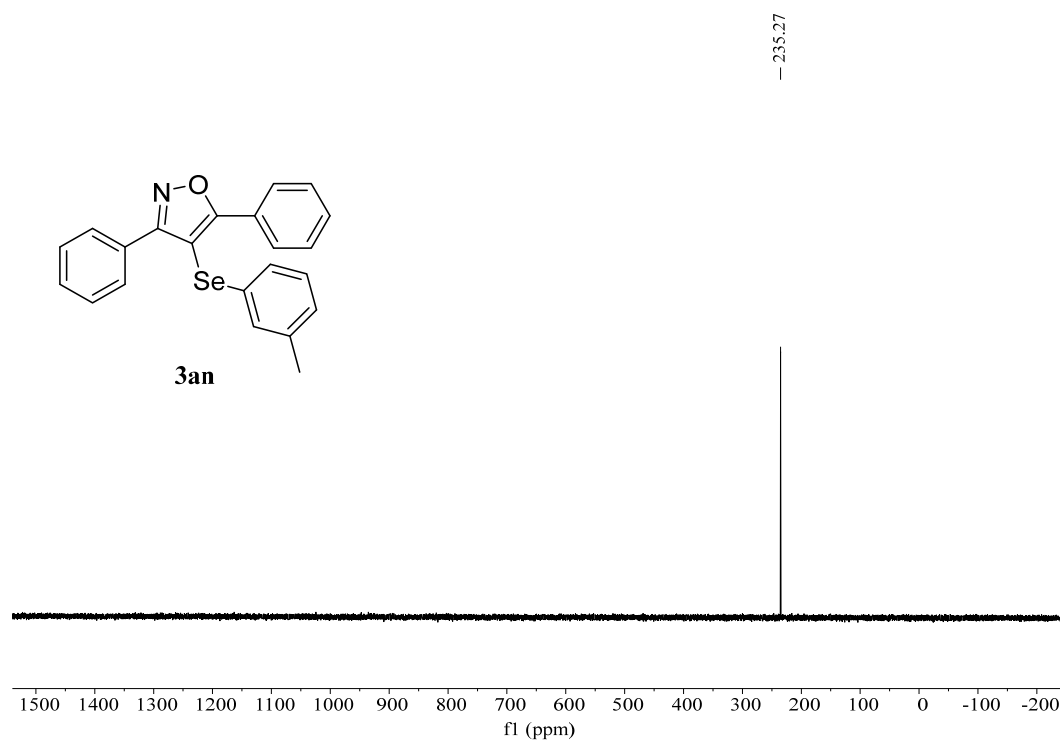

**Figure S52** <sup>77</sup>Se NMR (95.5 MHz) spectrum of **3an** in CDCl<sub>3</sub>



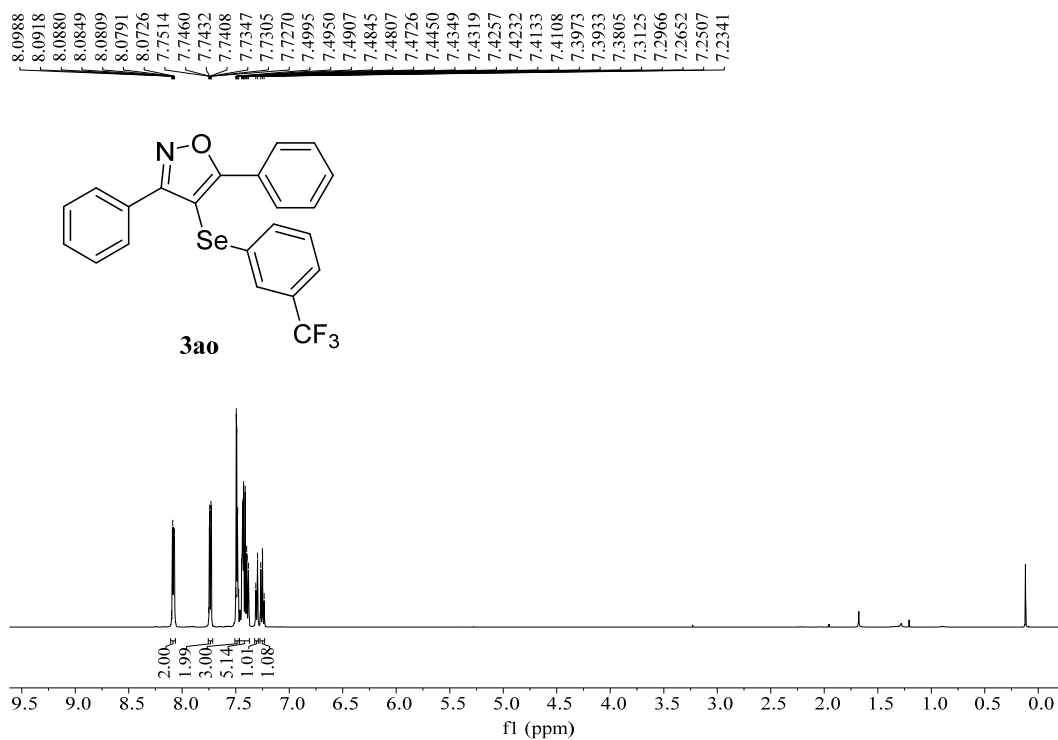

**Figure S53** <sup>1</sup>H NMR (500 MHz) spectrum of **3ao** in CDCl<sub>3</sub>

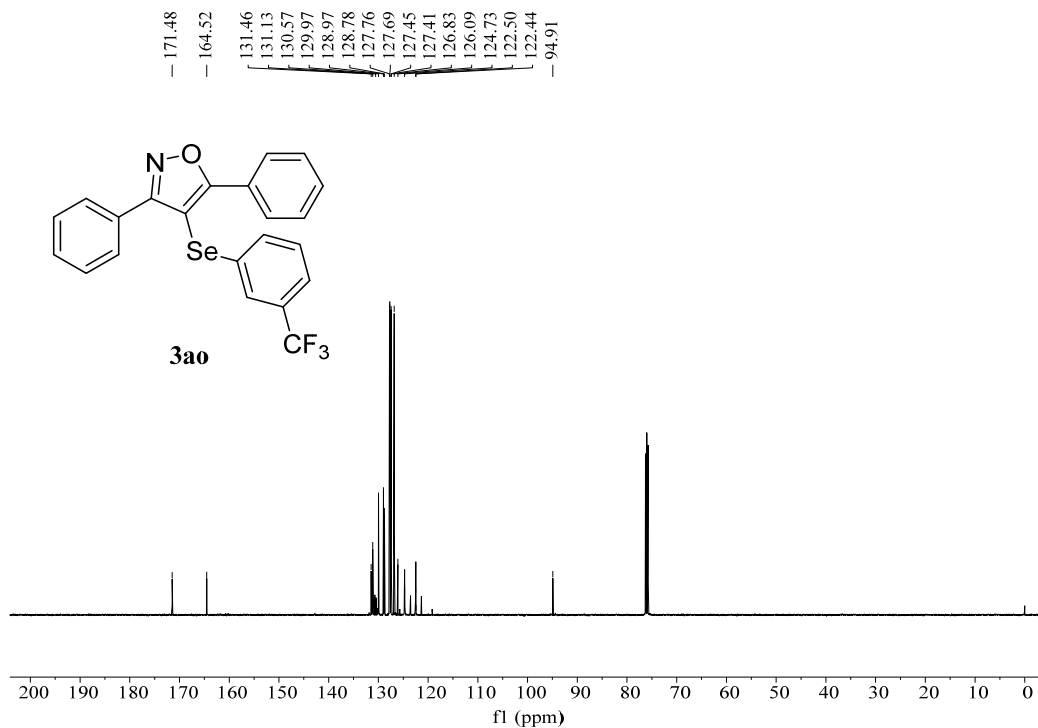

**Figure S54** <sup>13</sup>C NMR (125 MHz) spectrum of **3ao** in CDCl<sub>3</sub>

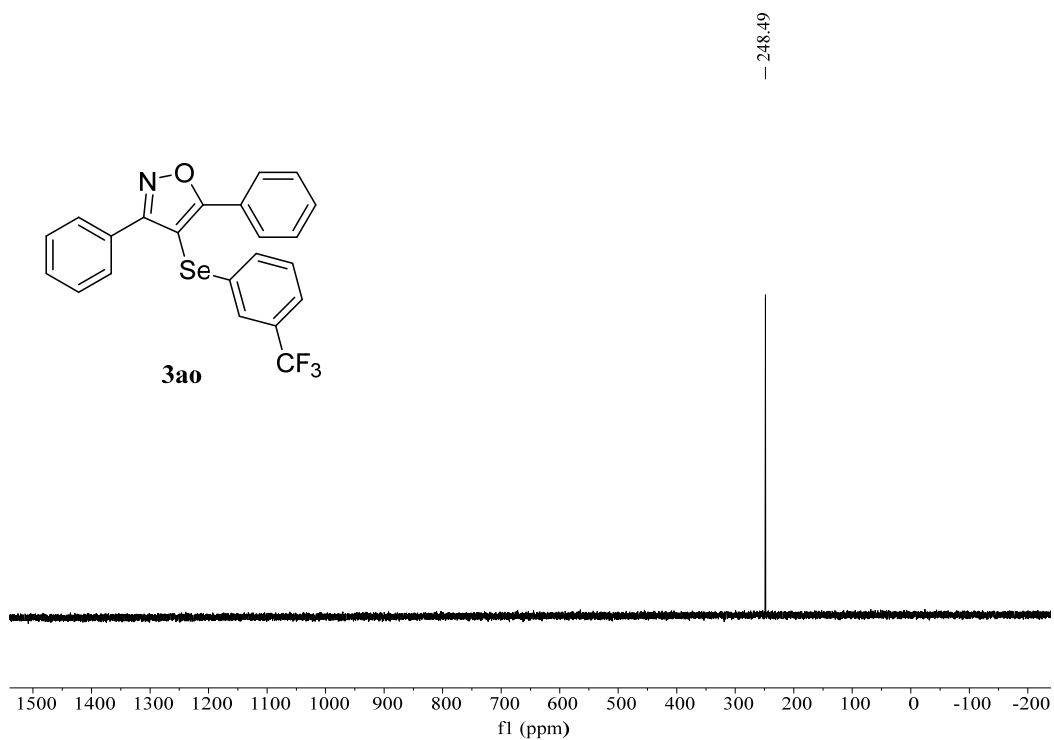

**Figure S55**  $^{77}\text{Se}$  NMR (95.5 MHz) spectrum of **3ao** in  $\text{CDCl}_3$

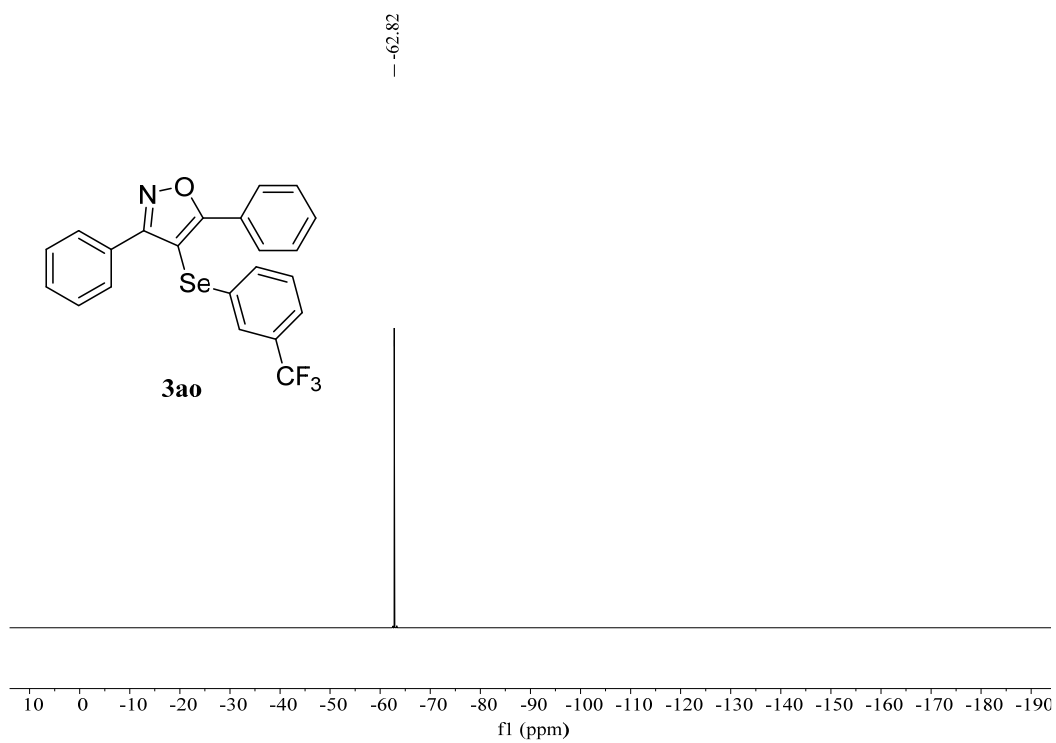

**Figure S56**  $^{19}\text{F}$  NMR (470 MHz) spectrum of **3ao** in  $\text{CDCl}_3$

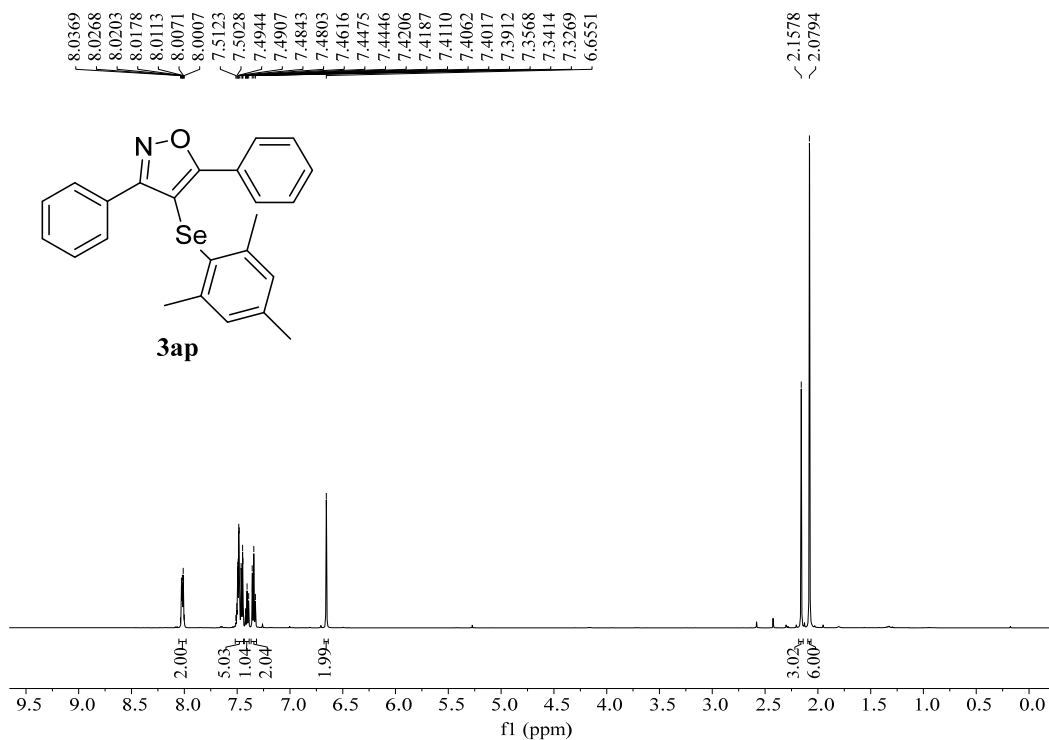

Figure S57 <sup>1</sup>H NMR (500 MHz) spectrum of **3ap** in CDCl<sub>3</sub>

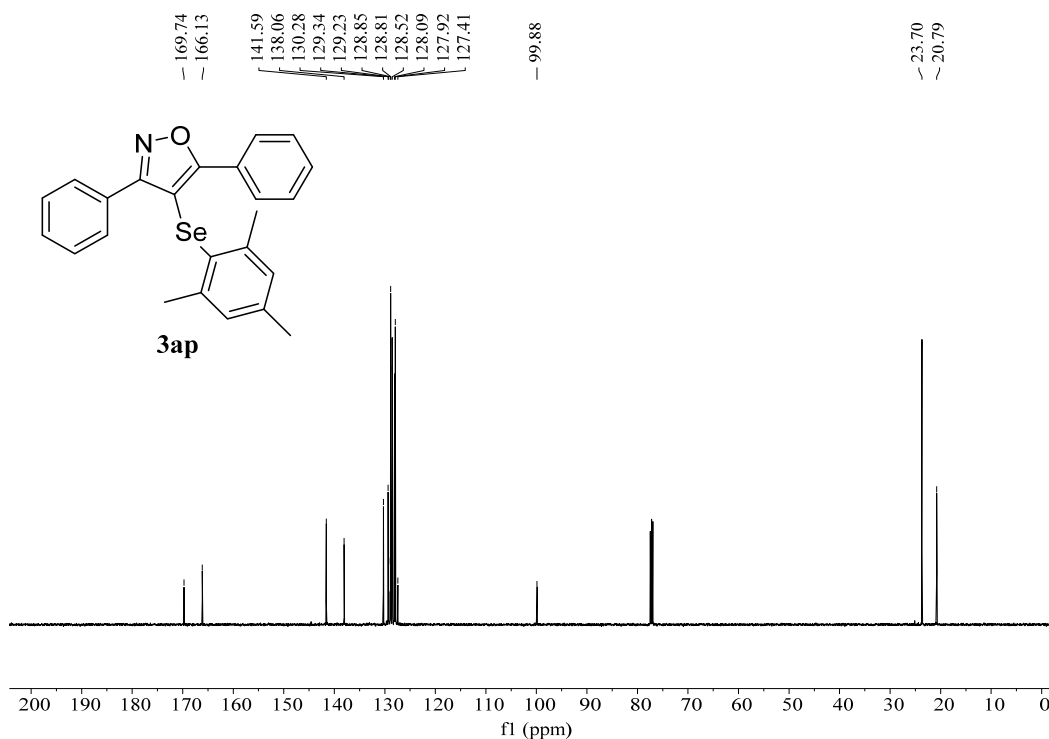

Figure S58 <sup>13</sup>C NMR (125 MHz) spectrum of **3ap** in CDCl<sub>3</sub>

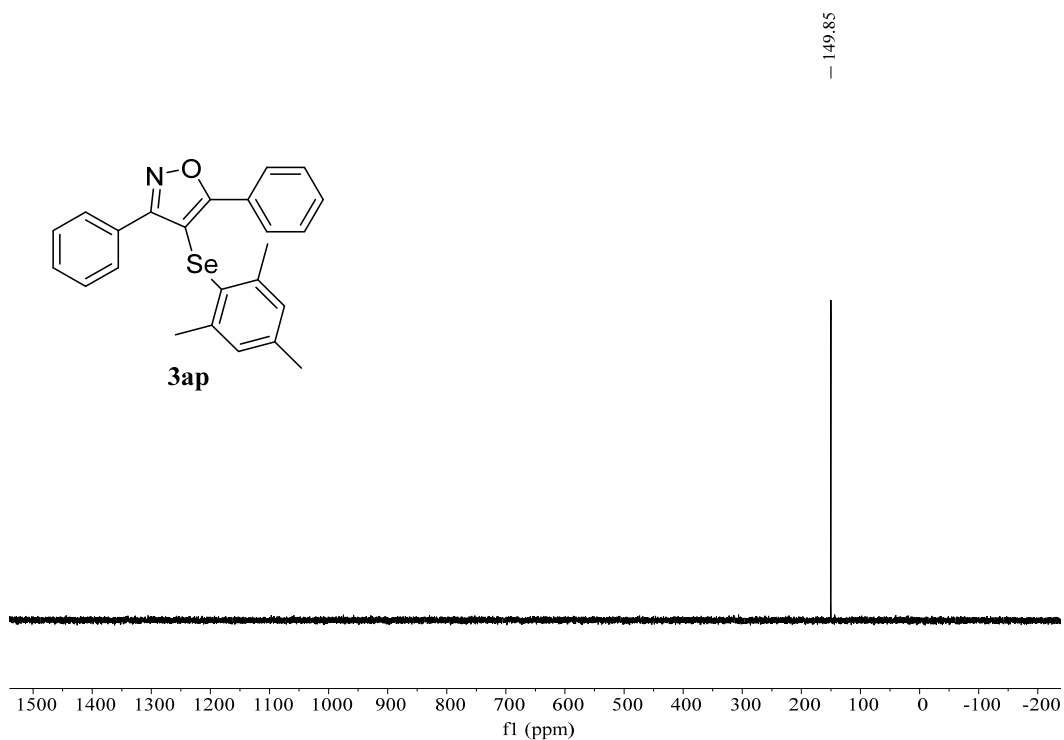

**Figure S59**  $^{77}\text{Se}$  NMR (95.5 MHz) spectrum of **3ap** in  $\text{CDCl}_3$

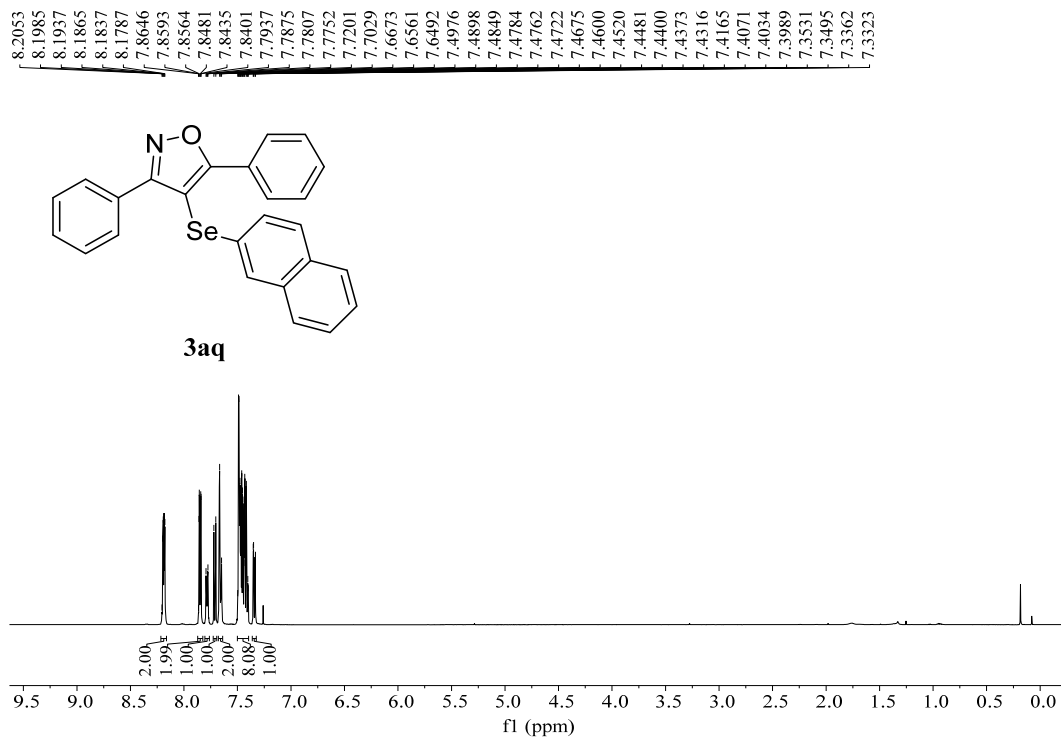

**Figure S60**  $^1\text{H}$  NMR (500 MHz) spectrum of **3aq** in  $\text{CDCl}_3$

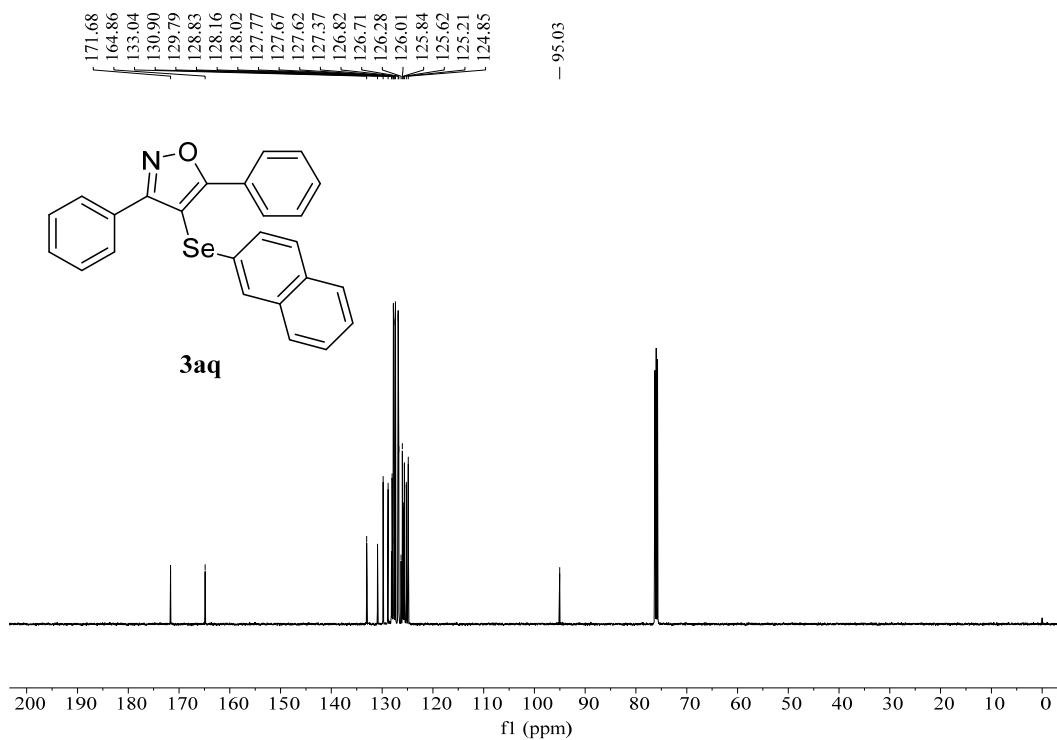

Figure S61 <sup>13</sup>C NMR (125 MHz) spectrum of **3aq** in CDCl<sub>3</sub>

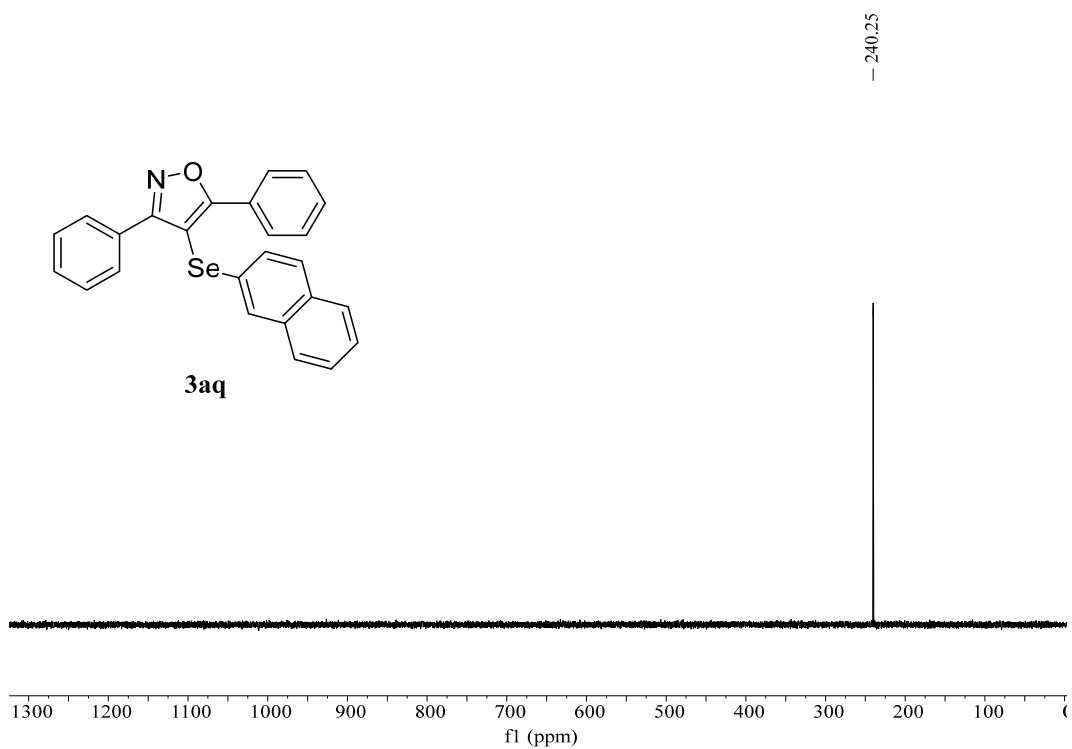

Figure S62 <sup>77</sup>Se NMR (95.5 MHz) spectrum of **3aq** in CDCl<sub>3</sub>

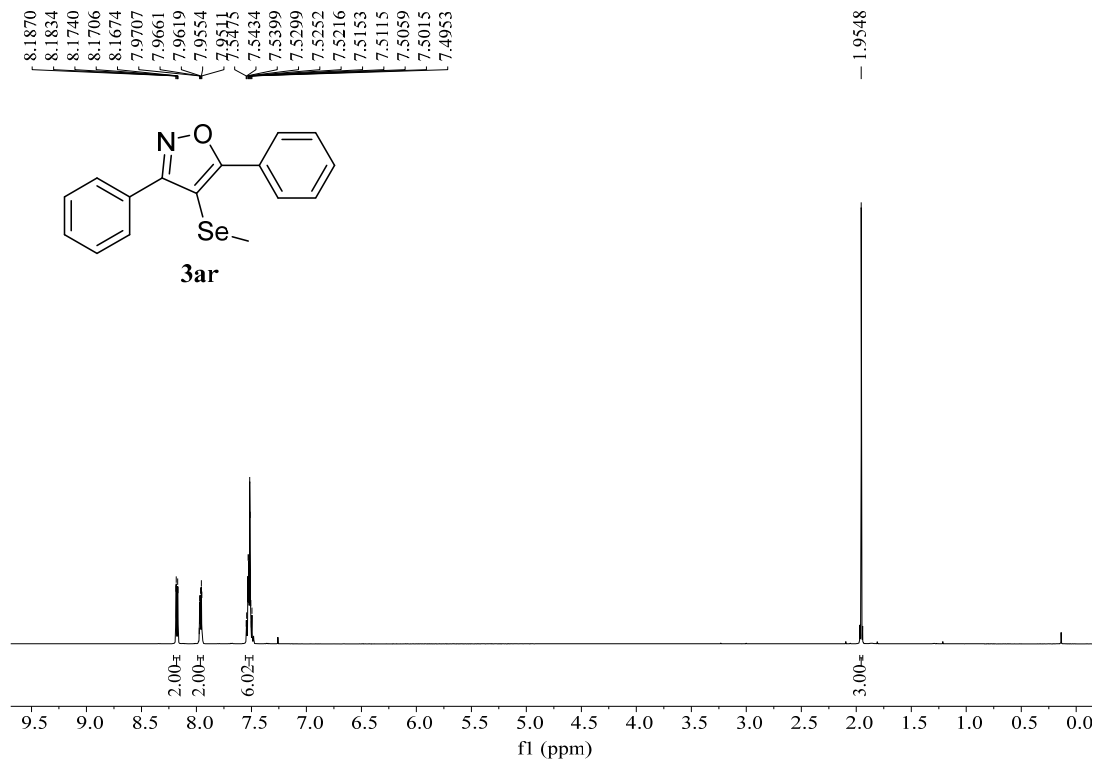

**Figure S63** <sup>1</sup>H NMR (500 MHz) spectrum of **3ar** in CDCl<sub>3</sub>

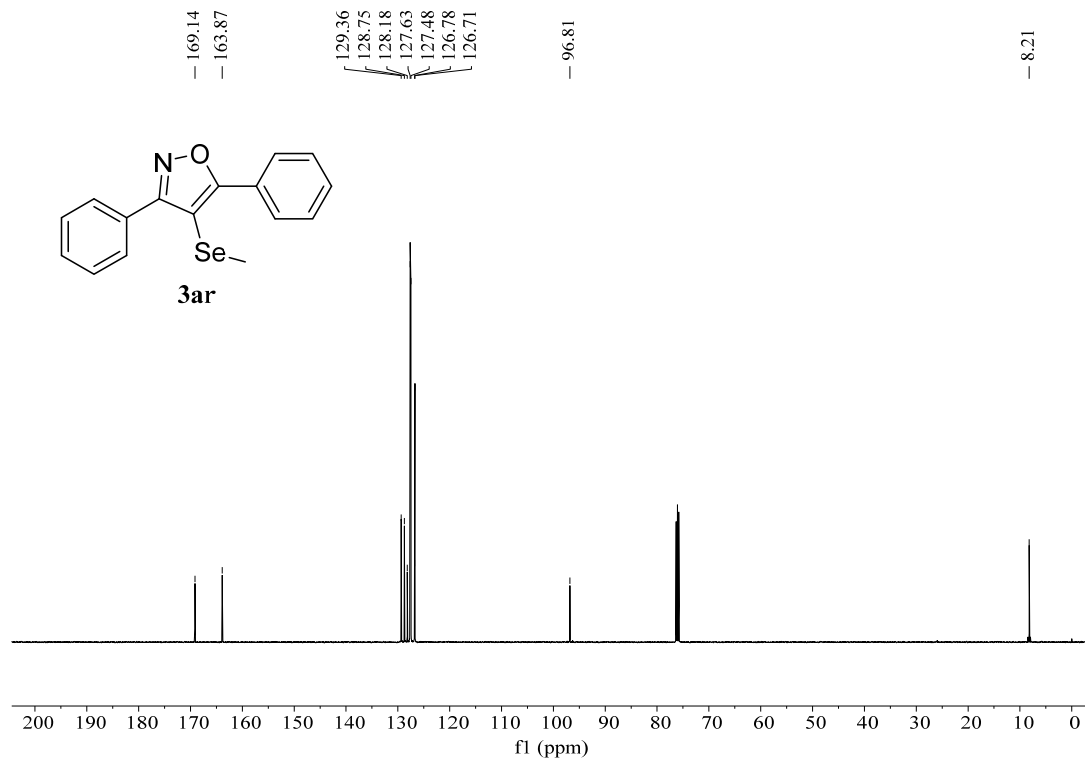

**Figure S64** <sup>13</sup>C NMR (125 MHz) spectrum of **3ar** in CDCl<sub>3</sub>

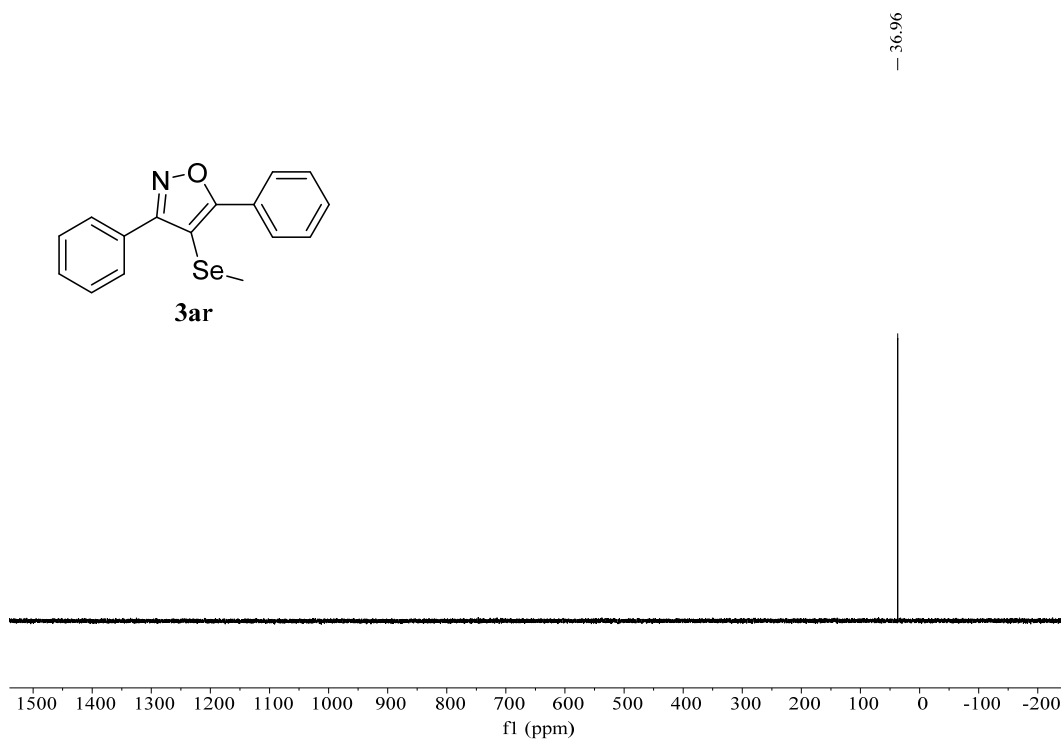

**Figure S65**  $^{77}\text{Se}$  NMR (95.5 MHz) spectrum of **3ar** in  $\text{CDCl}_3$

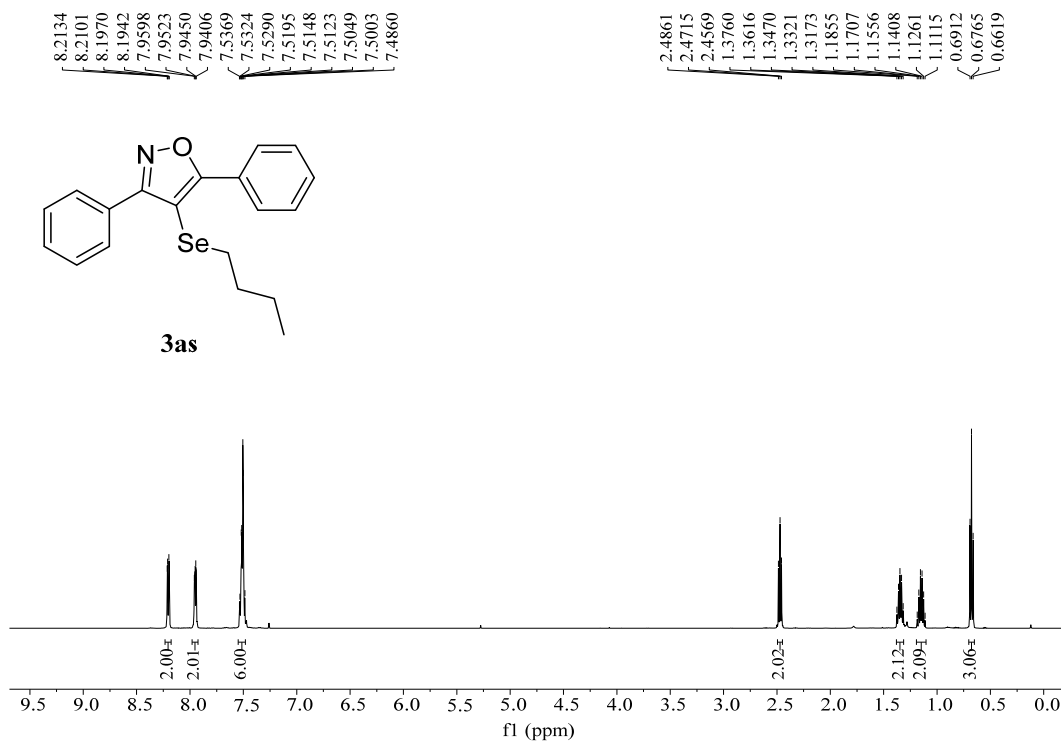

**Figure S66**  $^1\text{H}$  NMR (500 MHz) spectrum of **3as** in  $\text{CDCl}_3$

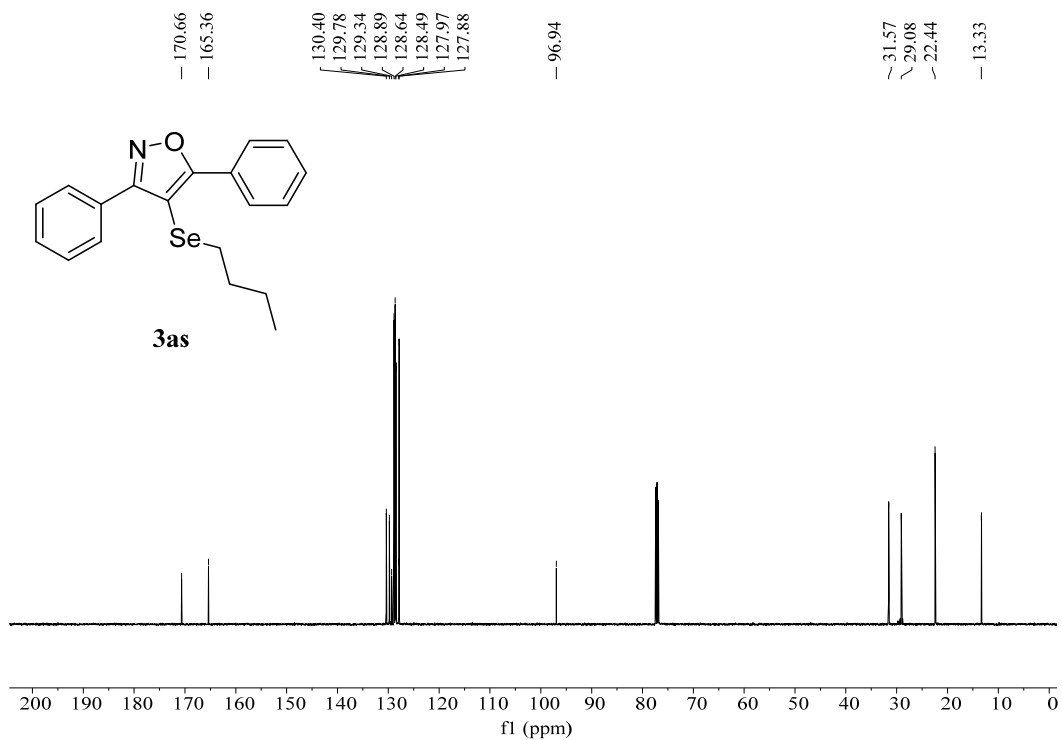

**Figure S67** <sup>13</sup>C NMR (125 MHz) spectrum of **3as** in CDCl<sub>3</sub>

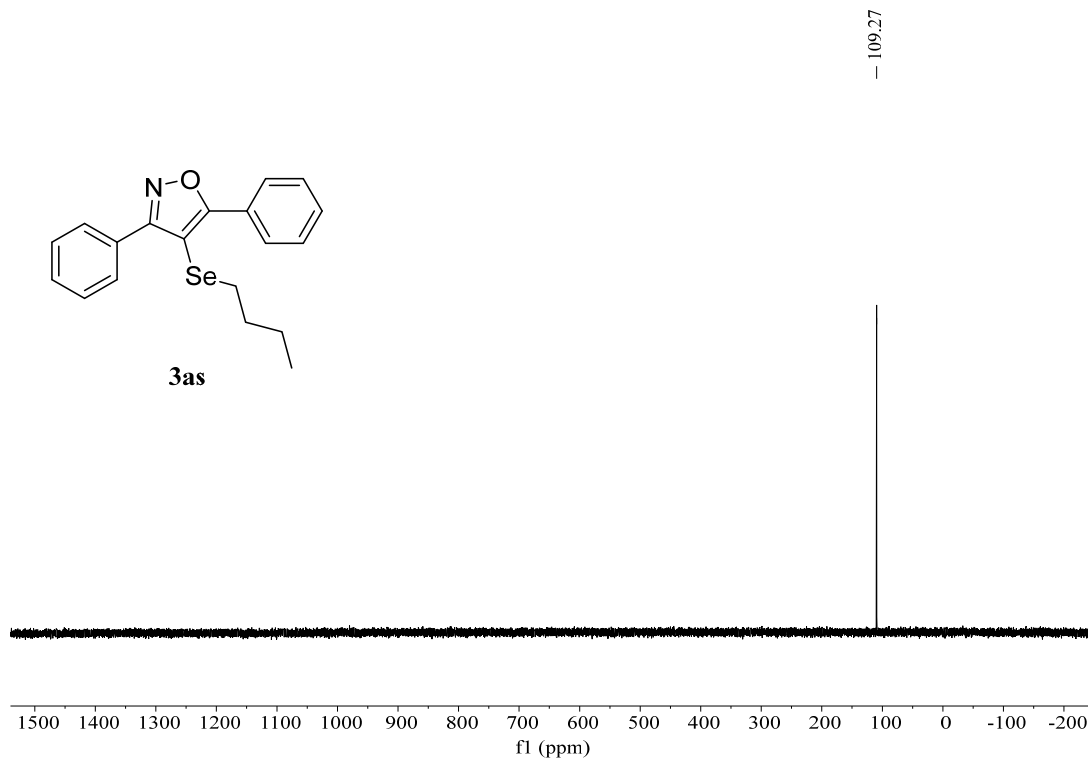

**Figure S68** <sup>77</sup>Se NMR (95.5 MHz) spectrum of **3as** in CDCl<sub>3</sub>



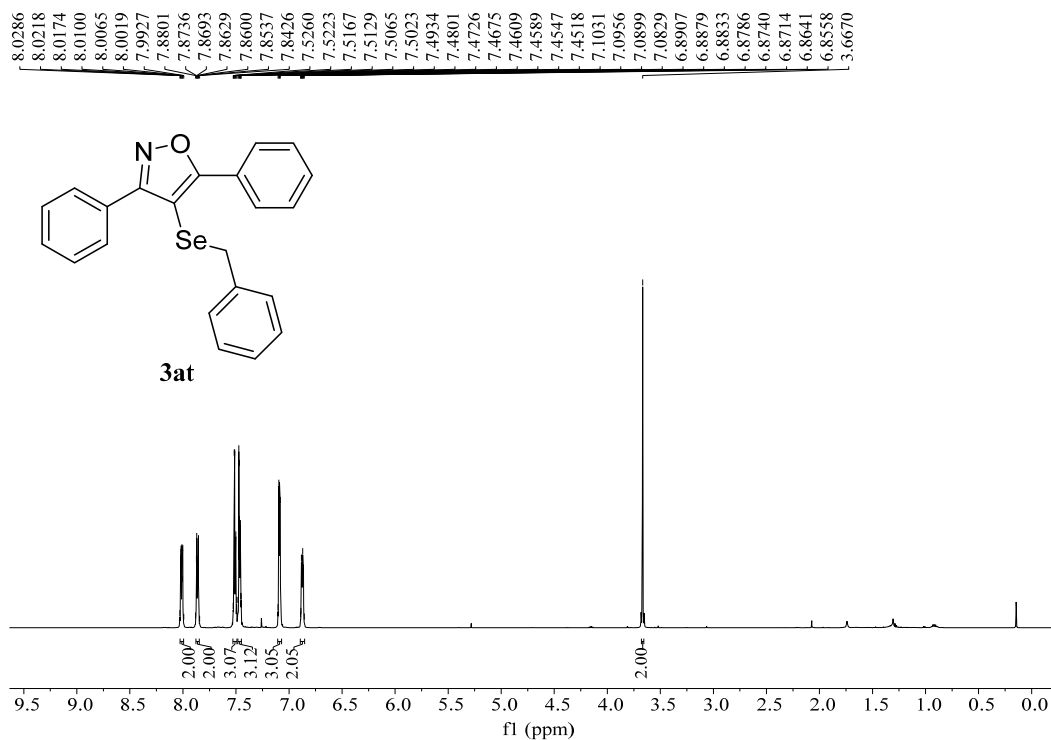

**Figure S69** <sup>1</sup>H NMR (500 MHz) spectrum of **3at** in CDCl<sub>3</sub>

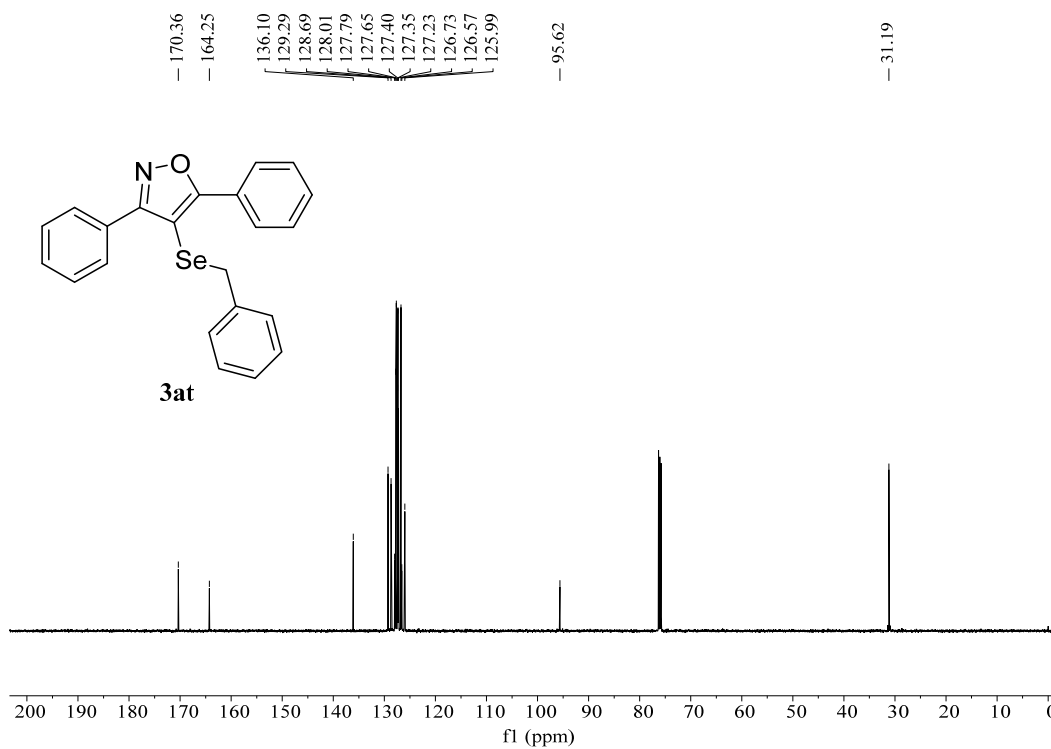

**Figure S70** <sup>13</sup>C NMR (125 MHz) spectrum of **3at** in CDCl<sub>3</sub>

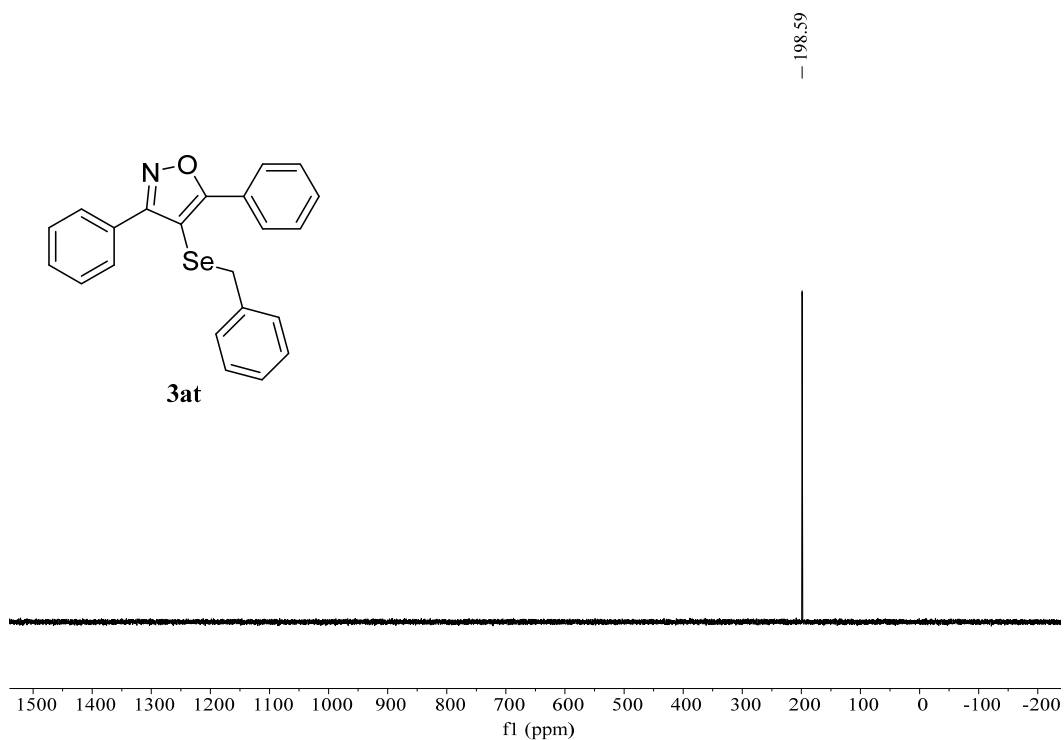

**Figure S71**  $^{77}\text{Se}$  NMR (95.5 MHz) spectrum of **3at** in  $\text{CDCl}_3$

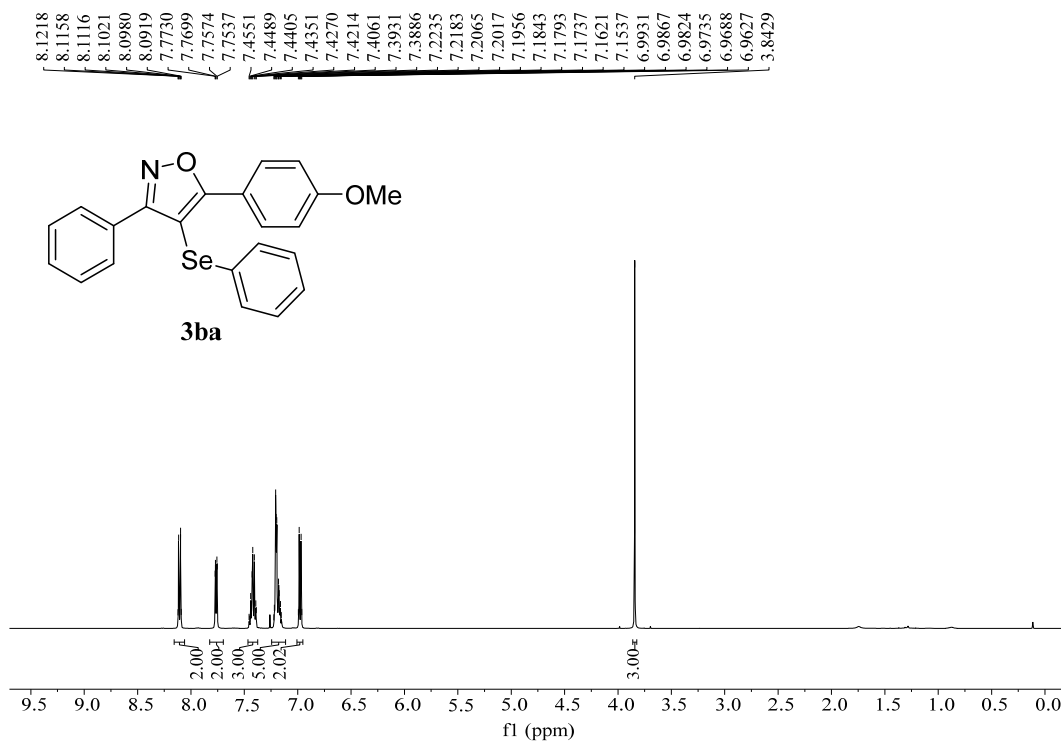

**Figure S72**  $^1\text{H}$  NMR (500 MHz) spectrum of **3ba** in  $\text{CDCl}_3$

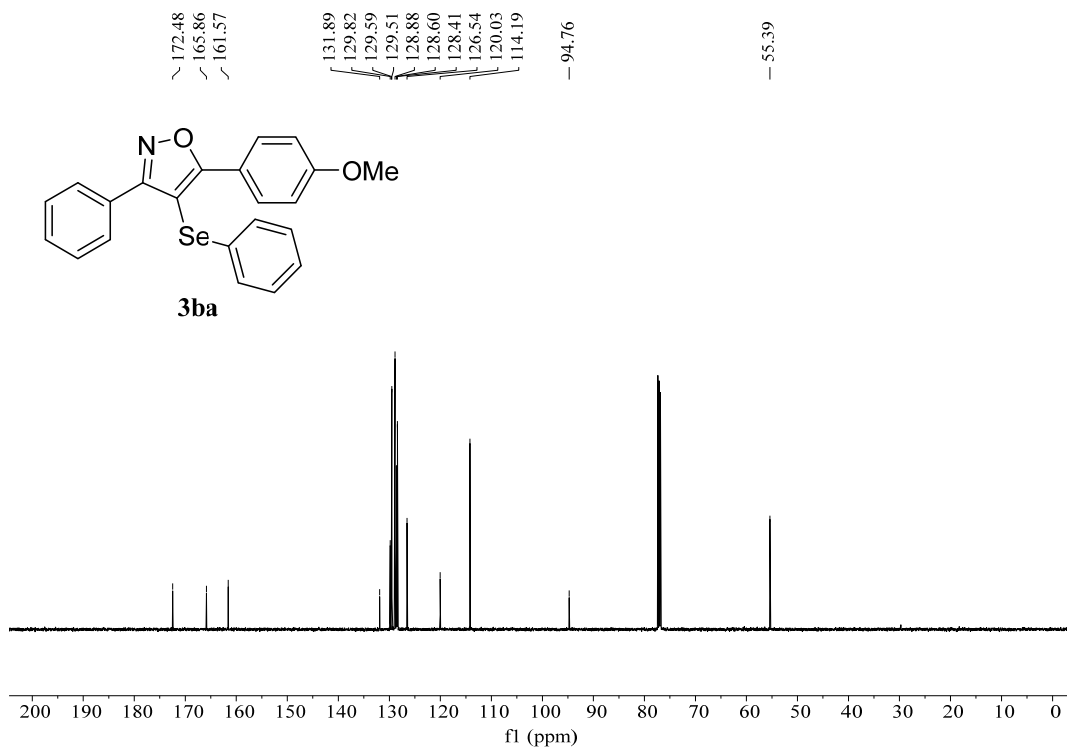

**Figure S73**  $^{13}\text{C}$  NMR (125 MHz) spectrum of **3ba** in  $\text{CDCl}_3$

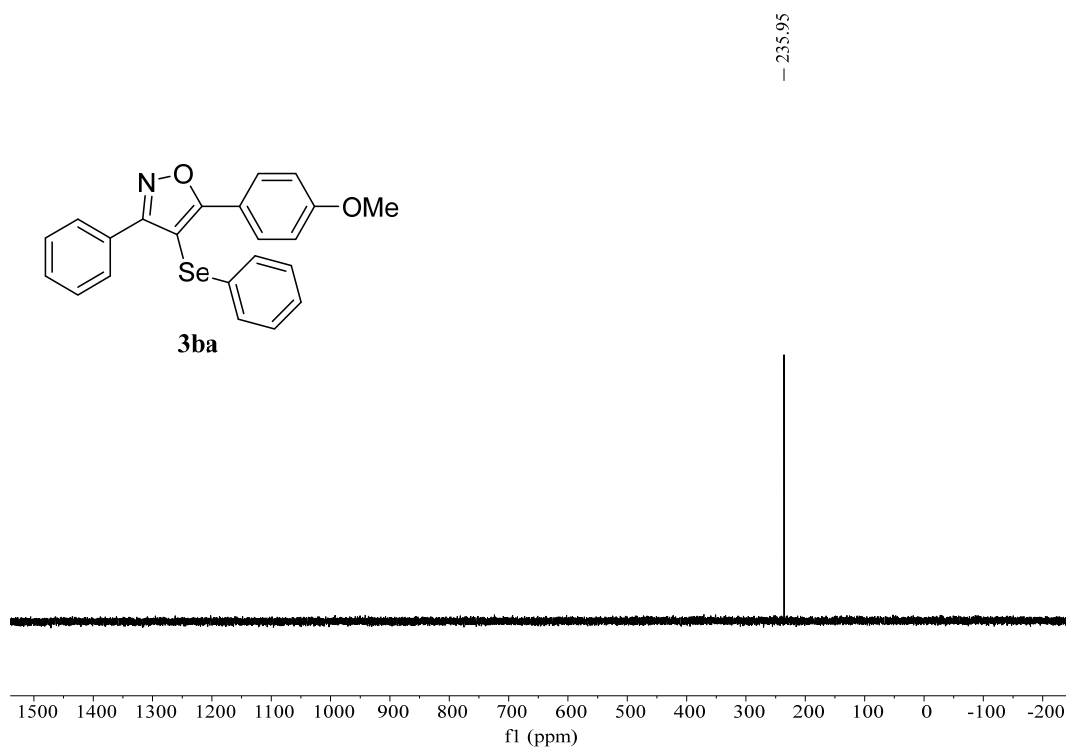

**Figure S74**  $^{77}\text{Se}$  NMR (95.5 MHz) spectrum of **3ba** in  $\text{CDCl}_3$

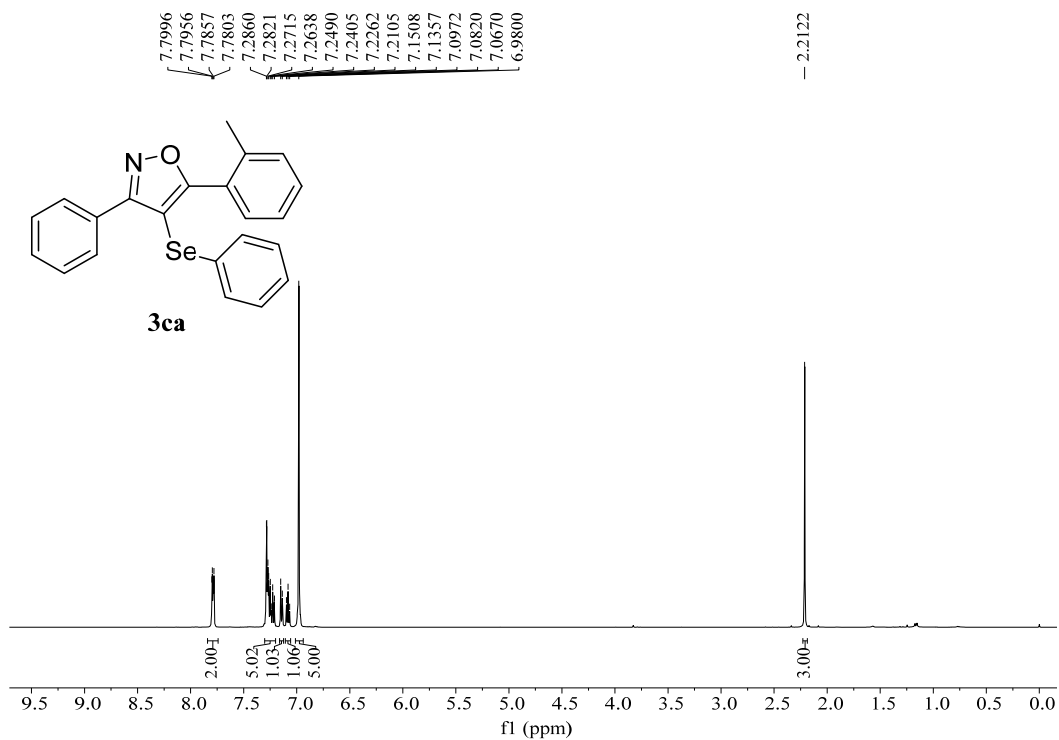

**Figure S75** <sup>1</sup>H NMR (500 MHz) spectrum of **3ca** in CDCl<sub>3</sub>

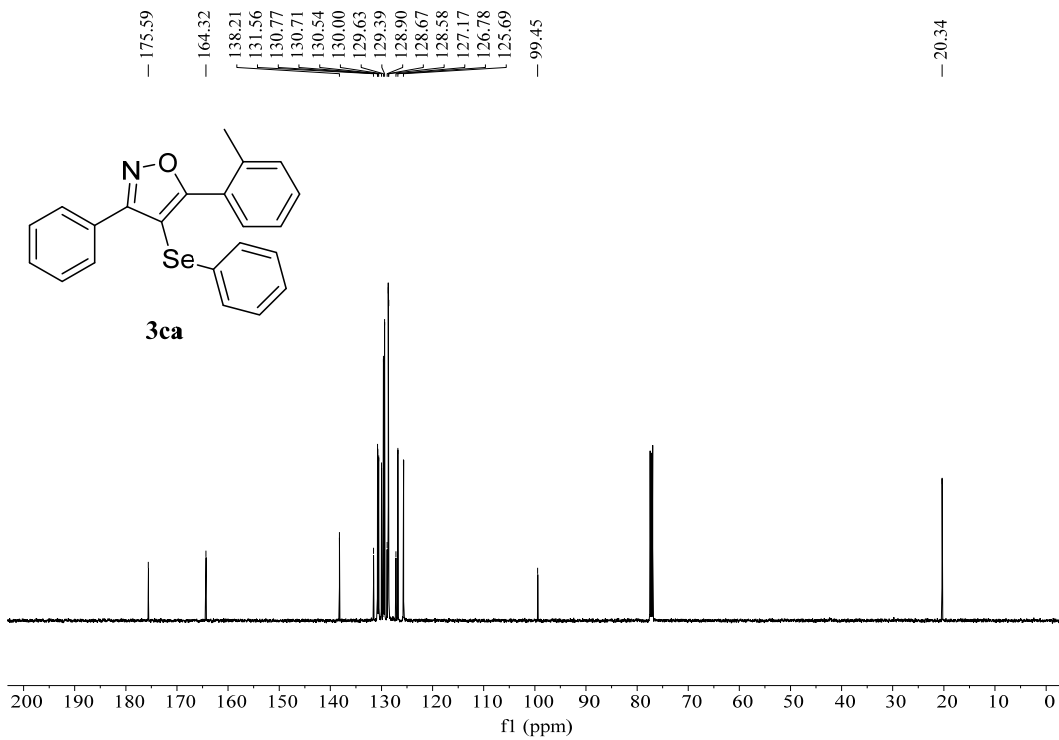

**Figure S76** <sup>13</sup>C NMR (125 MHz) spectrum of **3ca** in CDCl<sub>3</sub>

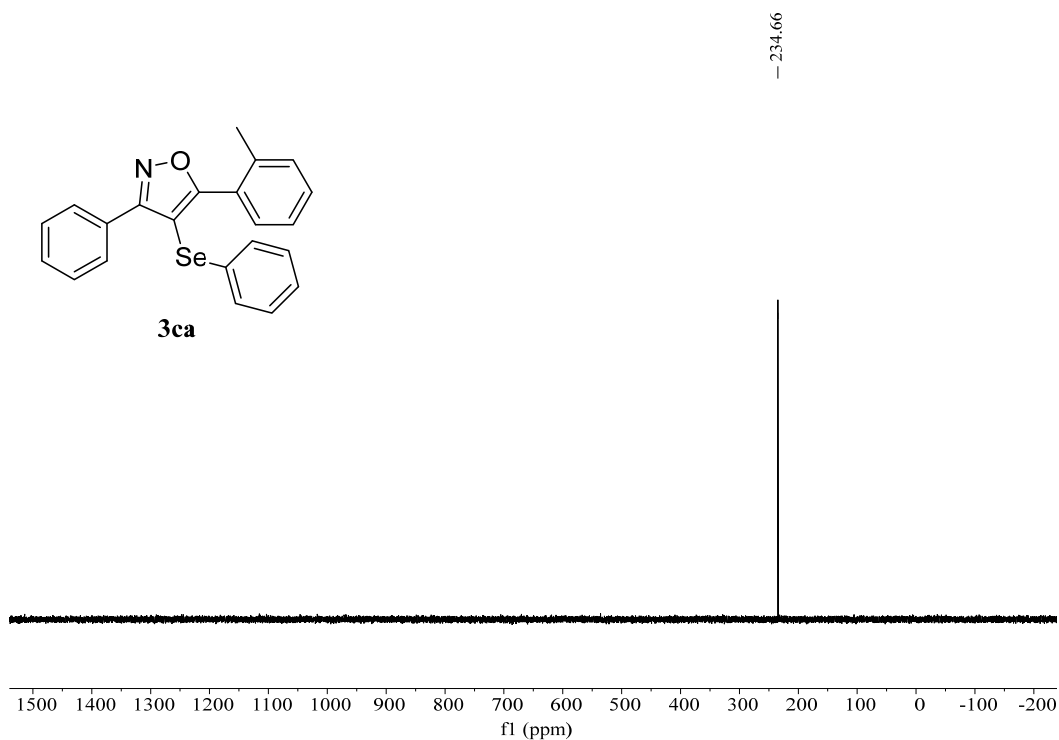

**Figure S77**  $^{77}\text{Se}$  NMR (95.5 MHz) spectrum of **3ca** in  $\text{CDCl}_3$

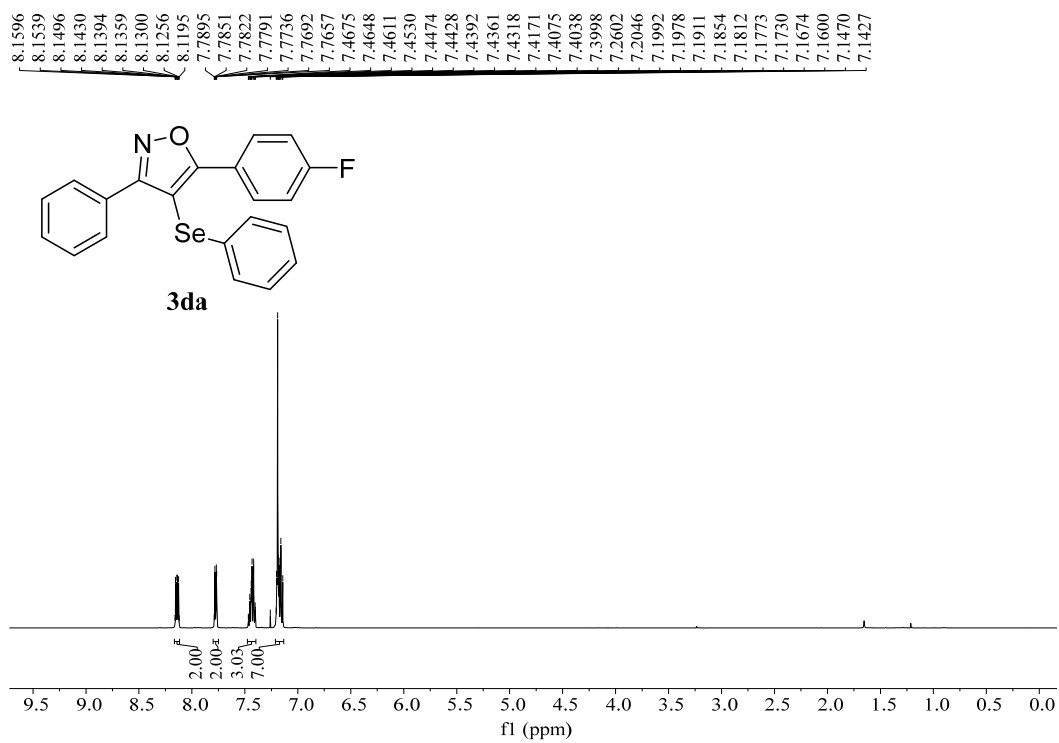

**Figure S78**  $^1\text{H}$  NMR (500 MHz) spectrum of **3da** in  $\text{CDCl}_3$

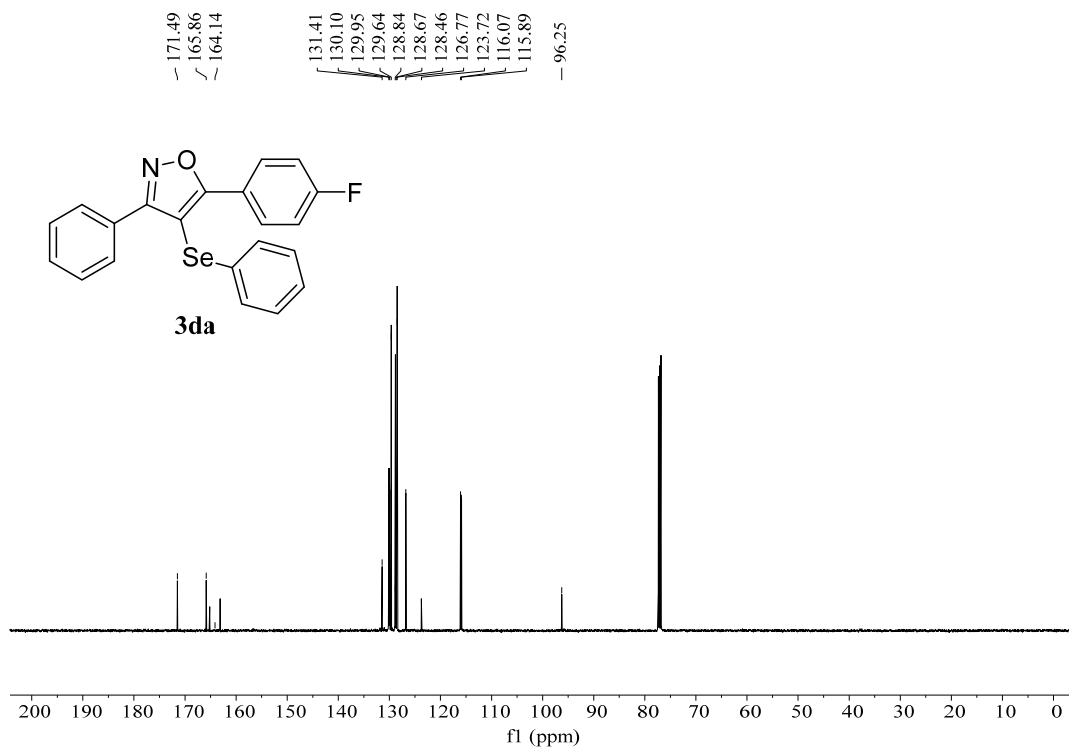

**Figure S79** <sup>13</sup>C NMR (125 MHz) spectrum of **3da** in CDCl<sub>3</sub>

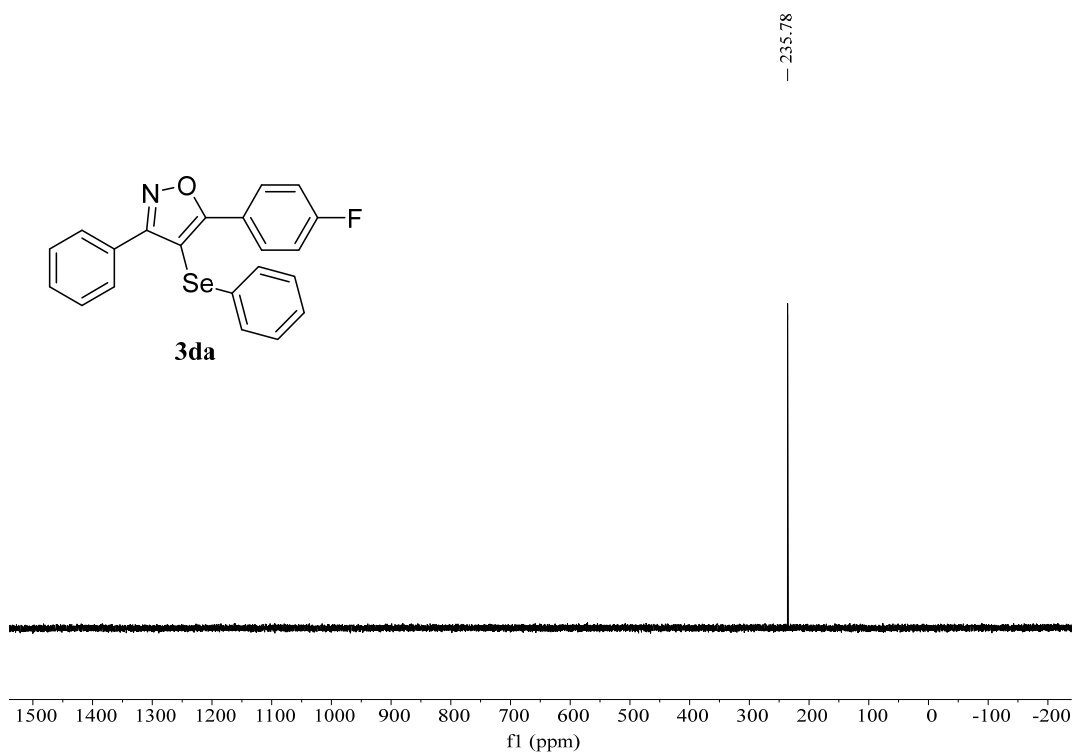

**Figure S80** <sup>77</sup>Se NMR (95.5 MHz) spectrum of **3da** in CDCl<sub>3</sub>

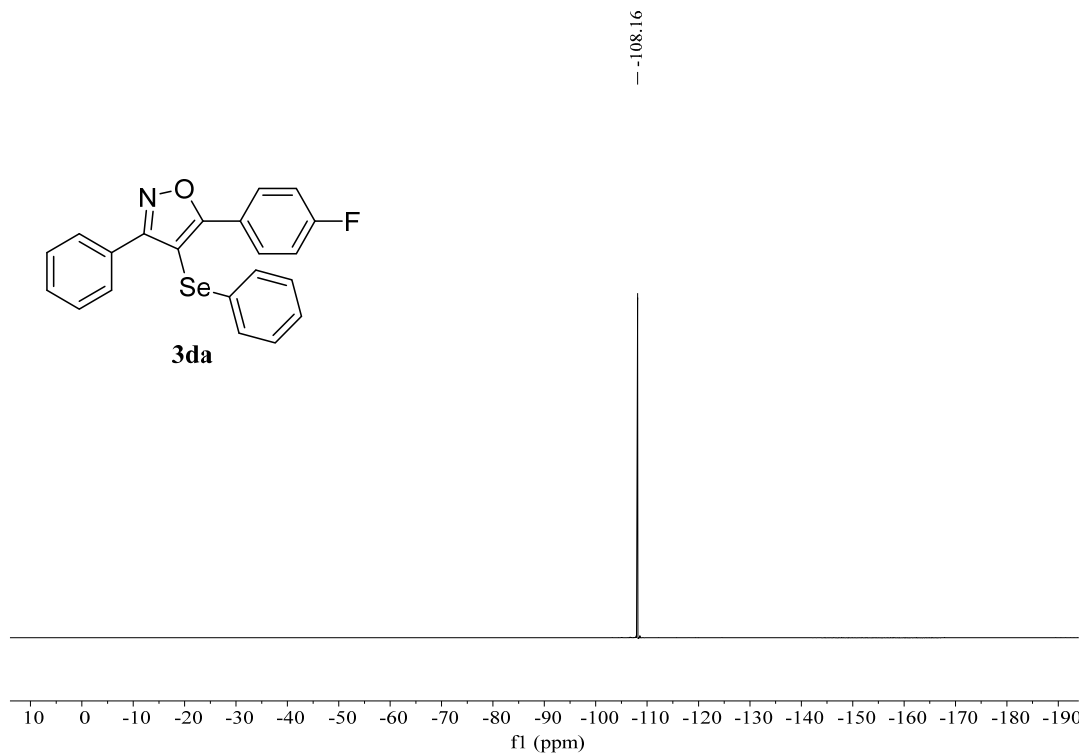

**Figure S81**  $^{19}\text{F}$  NMR (470 MHz) spectrum of **3da** in  $\text{CDCl}_3$

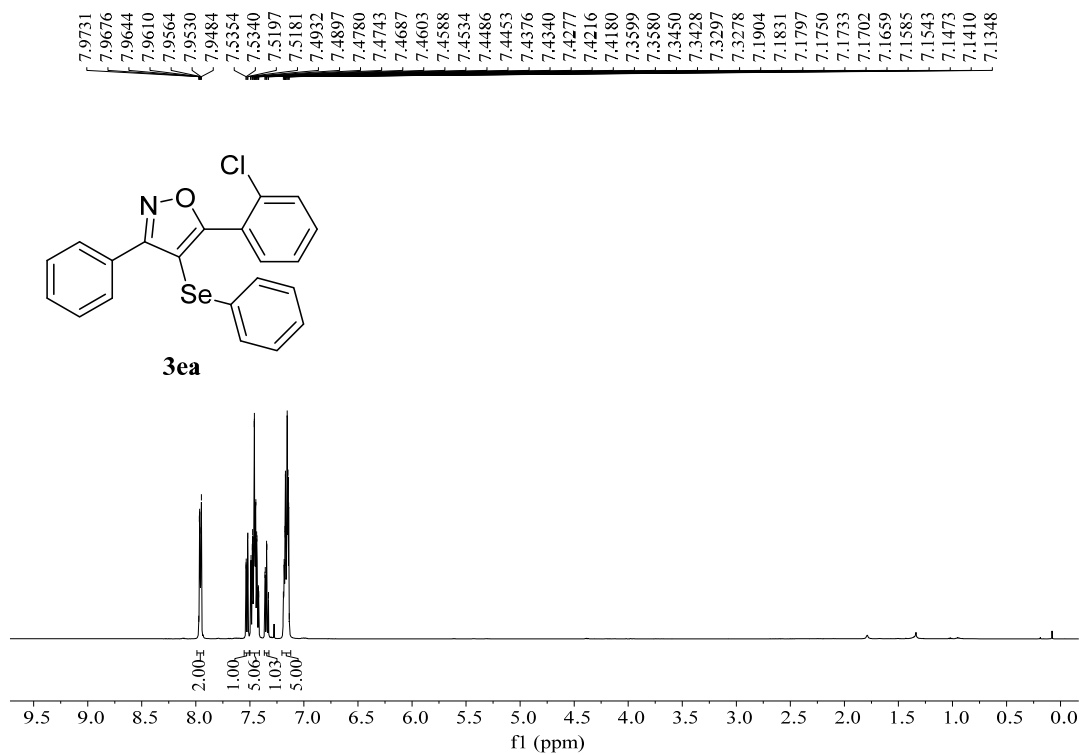

**Figure S82**  $^1\text{H}$  NMR (500 MHz) spectrum of **3ea** in  $\text{CDCl}_3$

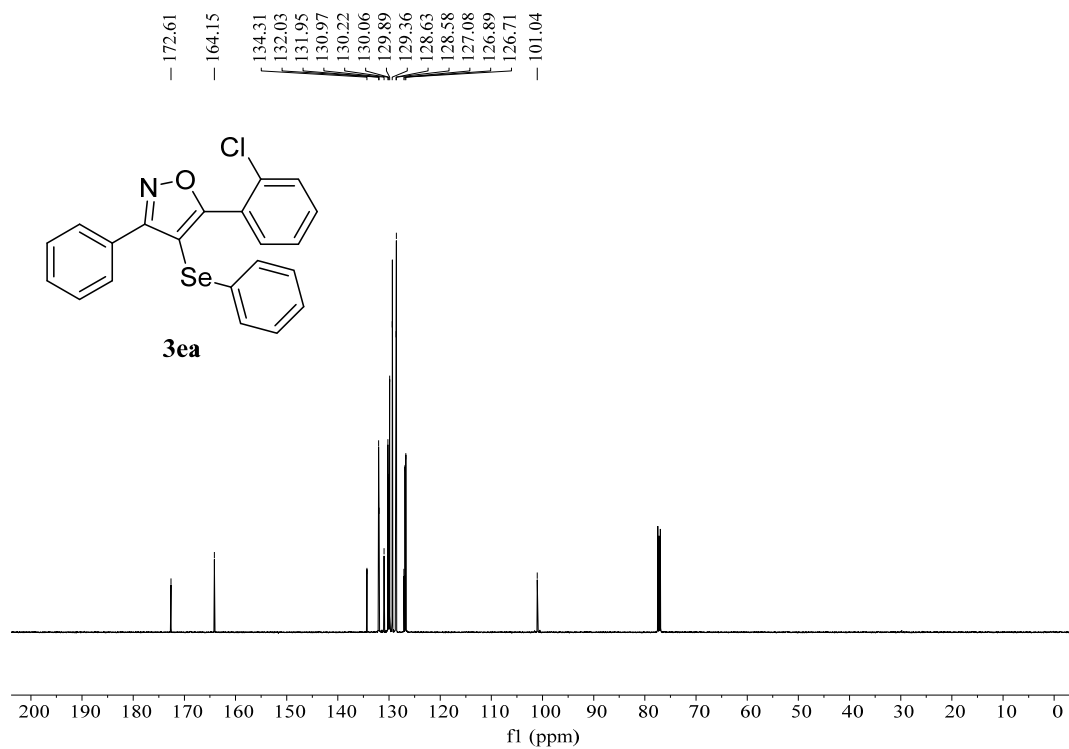

**Figure S83**  $^{13}\text{C}$  NMR (125 MHz) spectrum of **3ea** in  $\text{CDCl}_3$

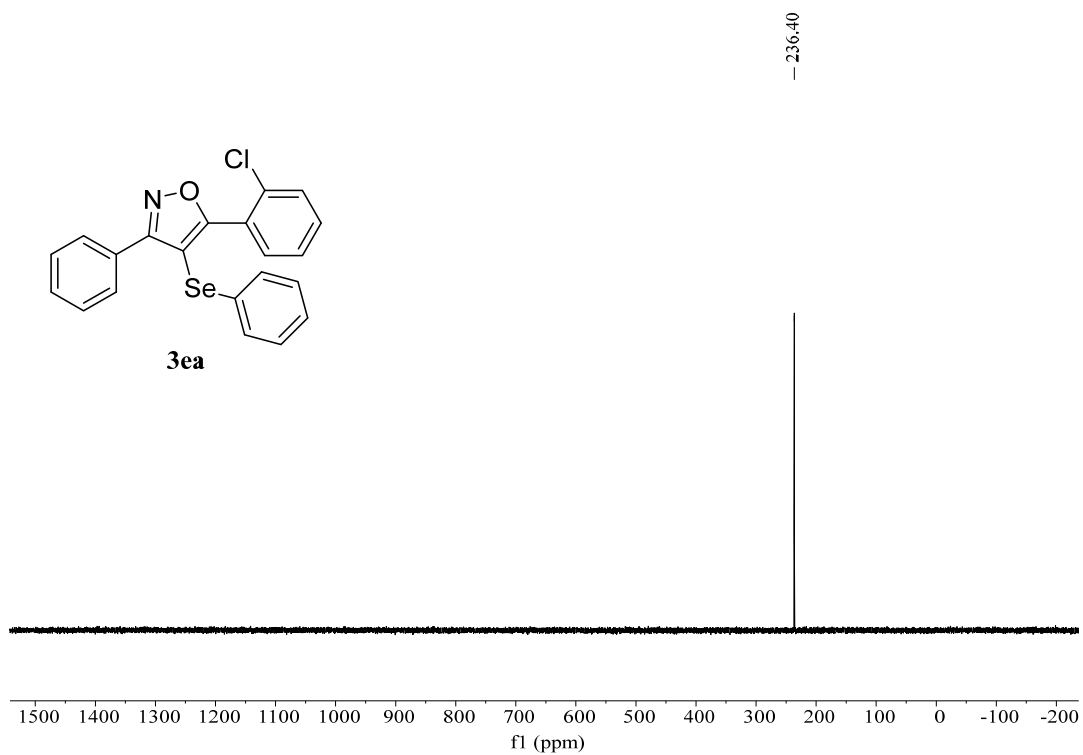

**Figure S84**  $^{77}\text{Se}$  NMR (95.5 MHz) spectrum of **3ea** in  $\text{CDCl}_3$



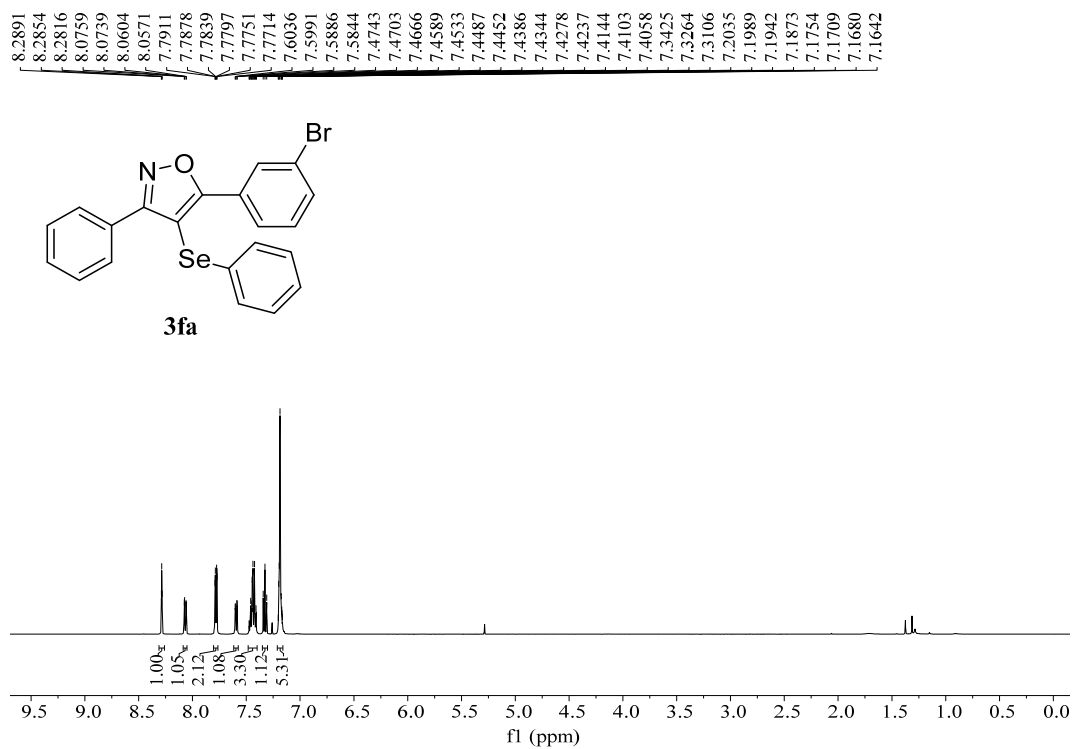

**Figure S85**  $^1\text{H}$  NMR (500 MHz) spectrum of **3fa** in  $\text{CDCl}_3$

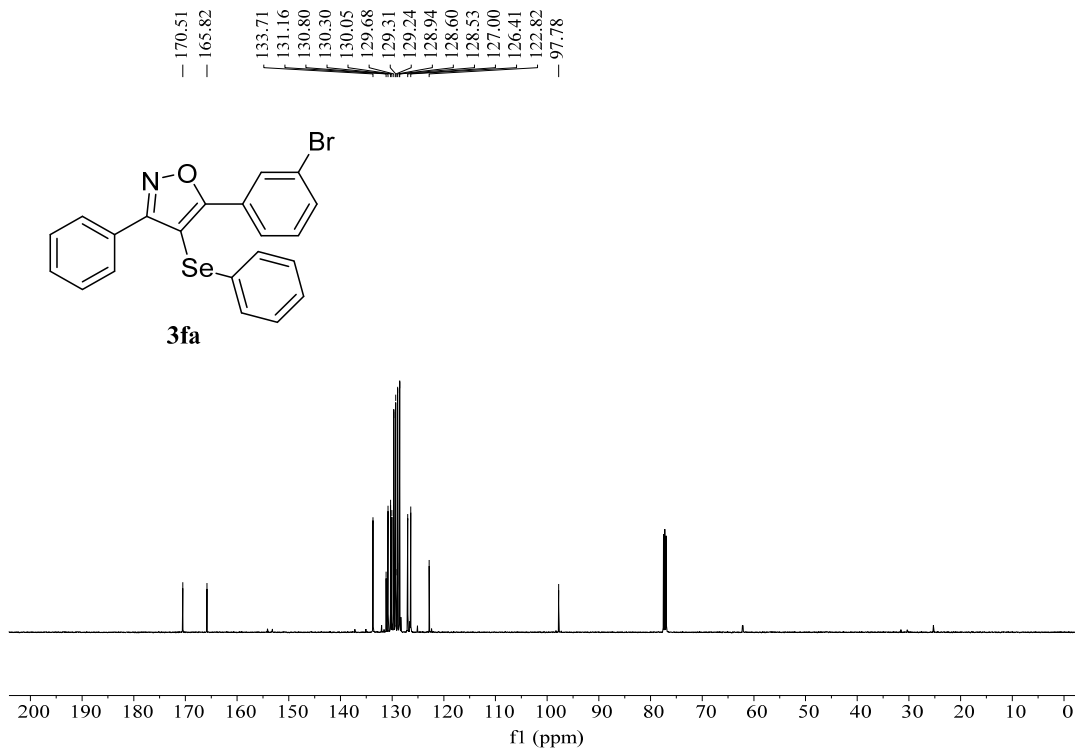

**Figure S86**  $^{13}\text{C}$  NMR (125 MHz) spectrum of **3fa** in  $\text{CDCl}_3$

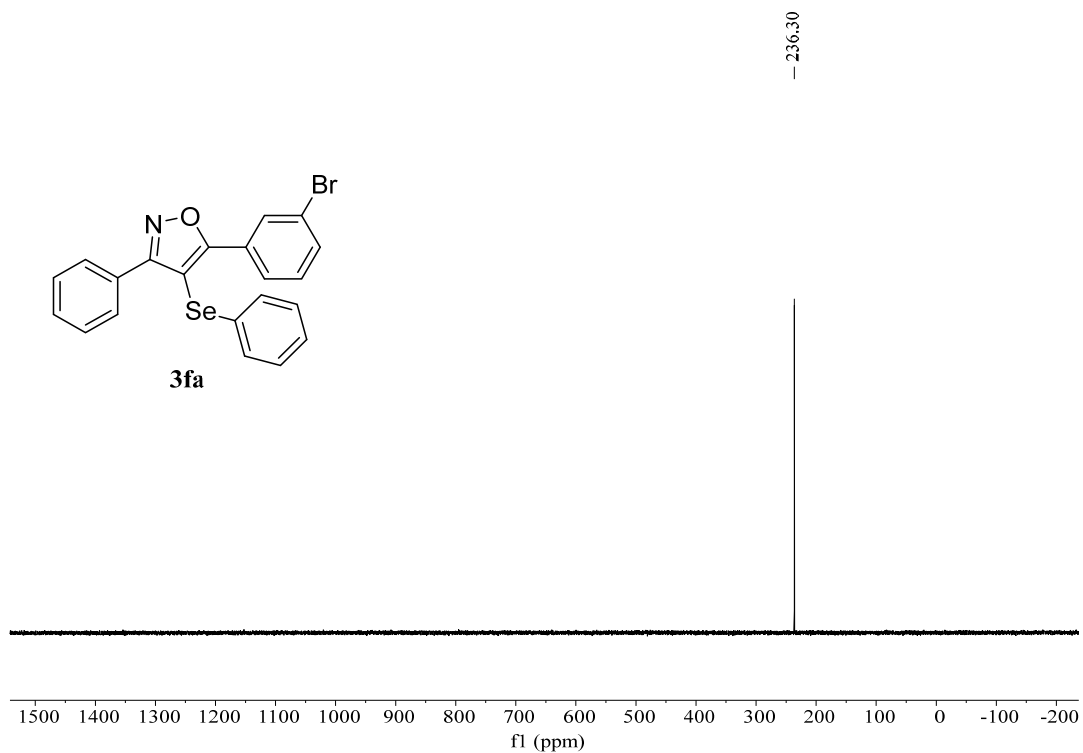

**Figure S87**  $^{77}\text{Se}$  NMR (95.5 MHz) spectrum of **3fa** in  $\text{CDCl}_3$

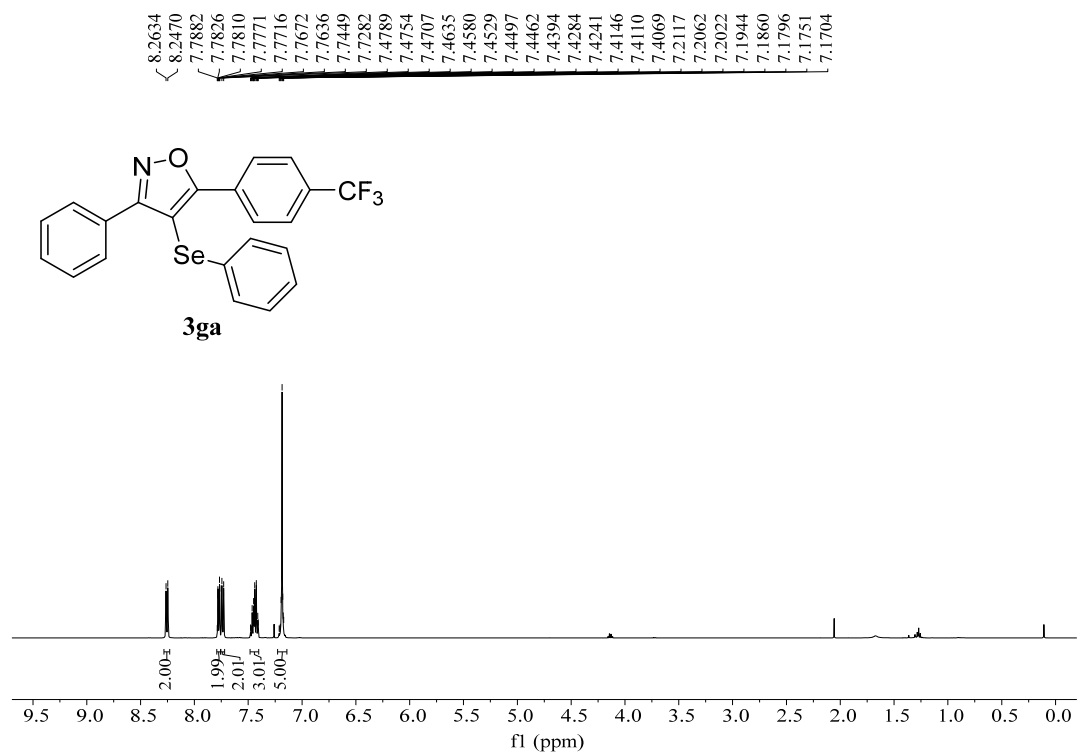

**Figure S88**  $^1\text{H}$  NMR (500 MHz) spectrum of **3ga** in  $\text{CDCl}_3$

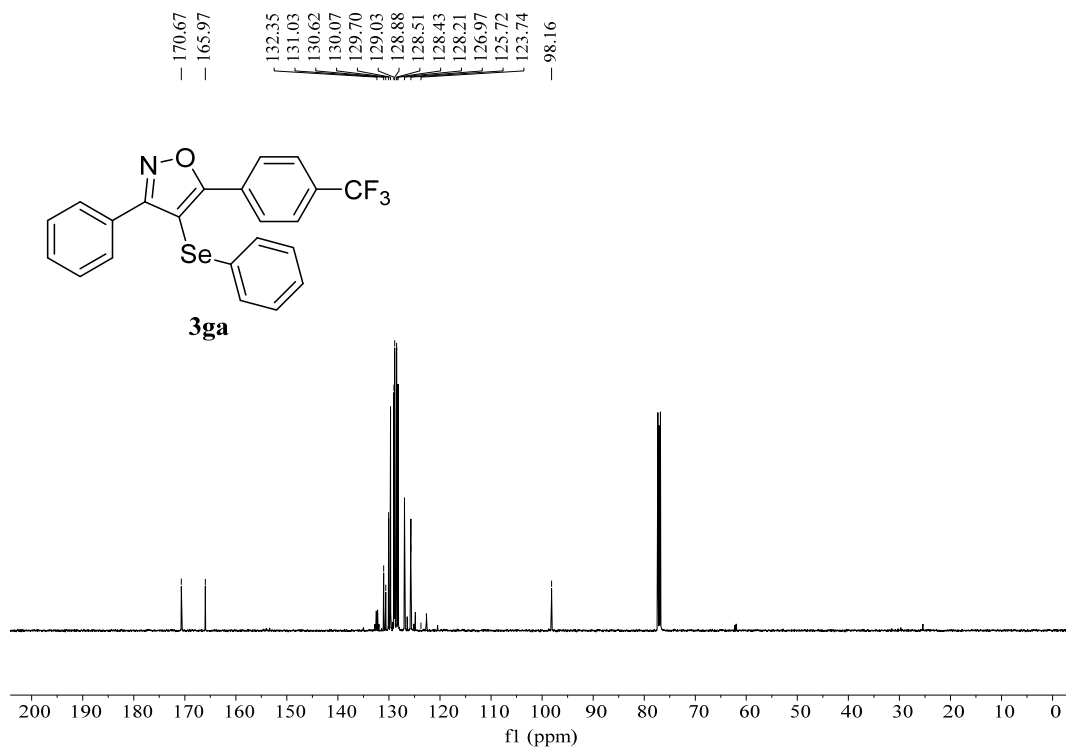

**Figure S89**  $^{13}\text{C}$  NMR (125 MHz) spectrum of **3ga** in  $\text{CDCl}_3$

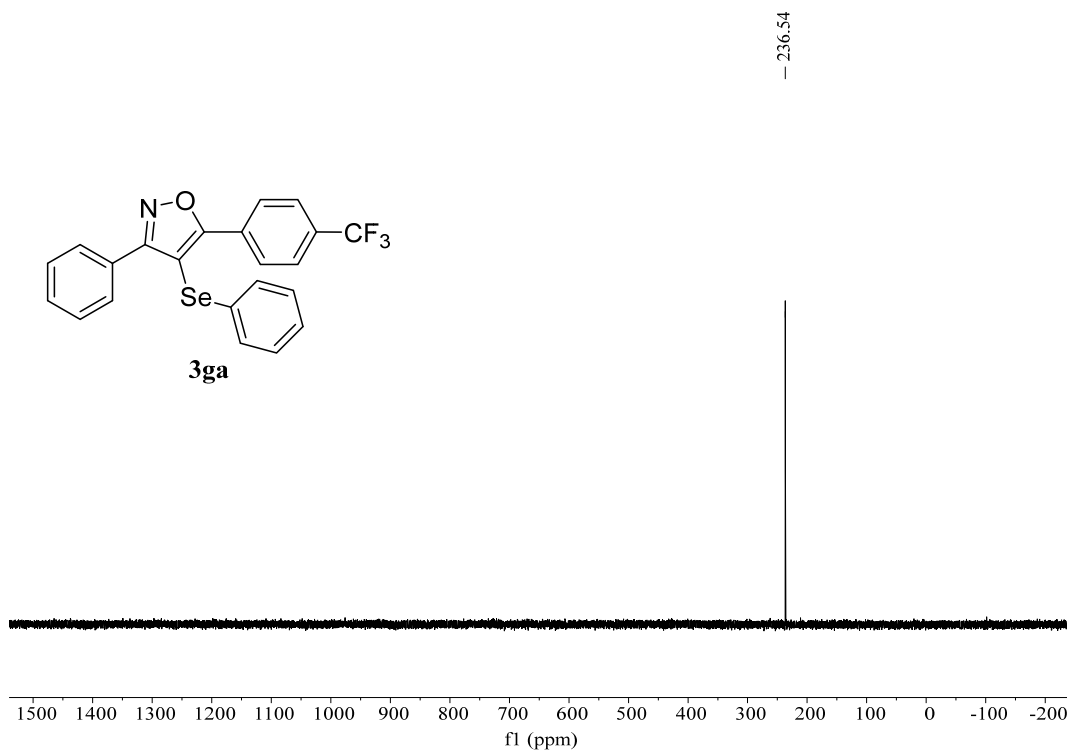

**Figure S90**  $^{77}\text{Se}$  NMR (95.5 MHz) spectrum of **3ga** in  $\text{CDCl}_3$

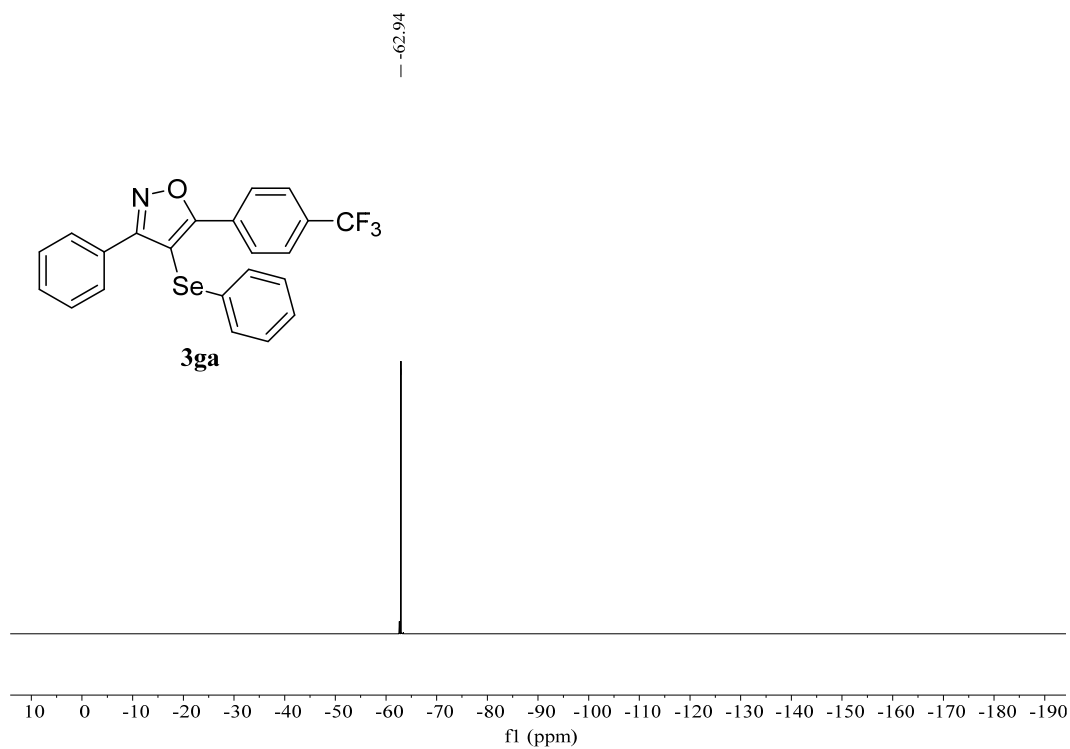

**Figure S91**  $^{19}\text{F}$  NMR (470 MHz) spectrum of **3ga** in  $\text{CDCl}_3$

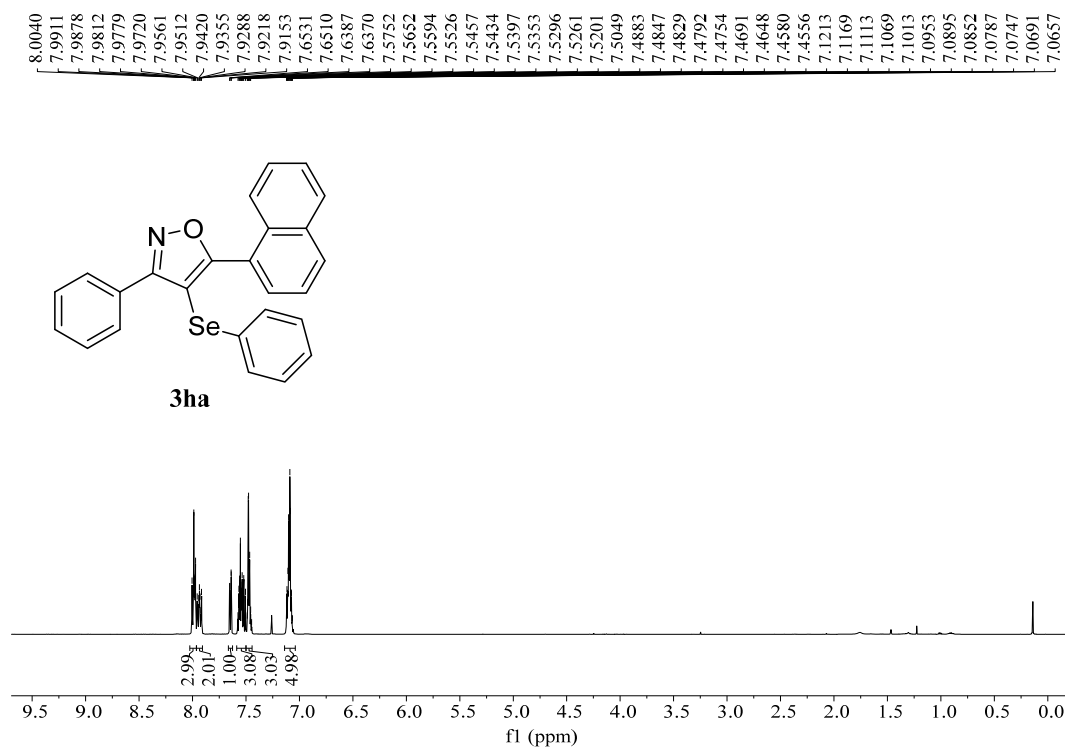

**Figure S92**  $^1\text{H}$  NMR (500 MHz) spectrum of **3ha** in  $\text{CDCl}_3$

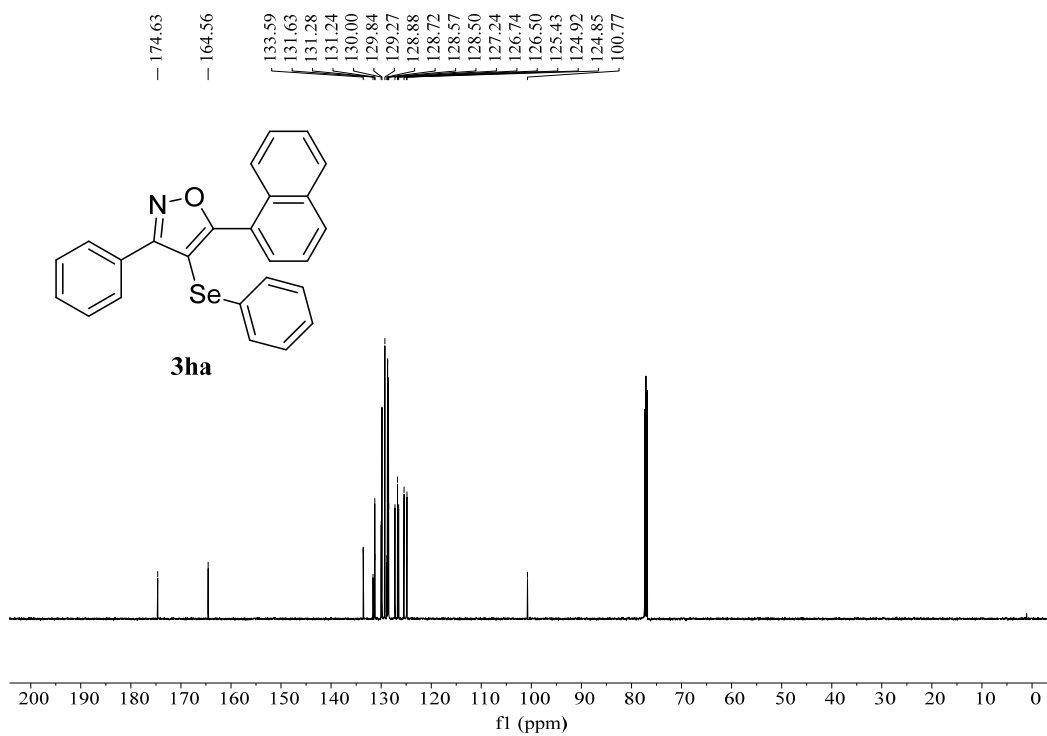

**Figure S93**  $^{13}\text{C}$  NMR (125 MHz) spectrum of **3ha** in  $\text{CDCl}_3$

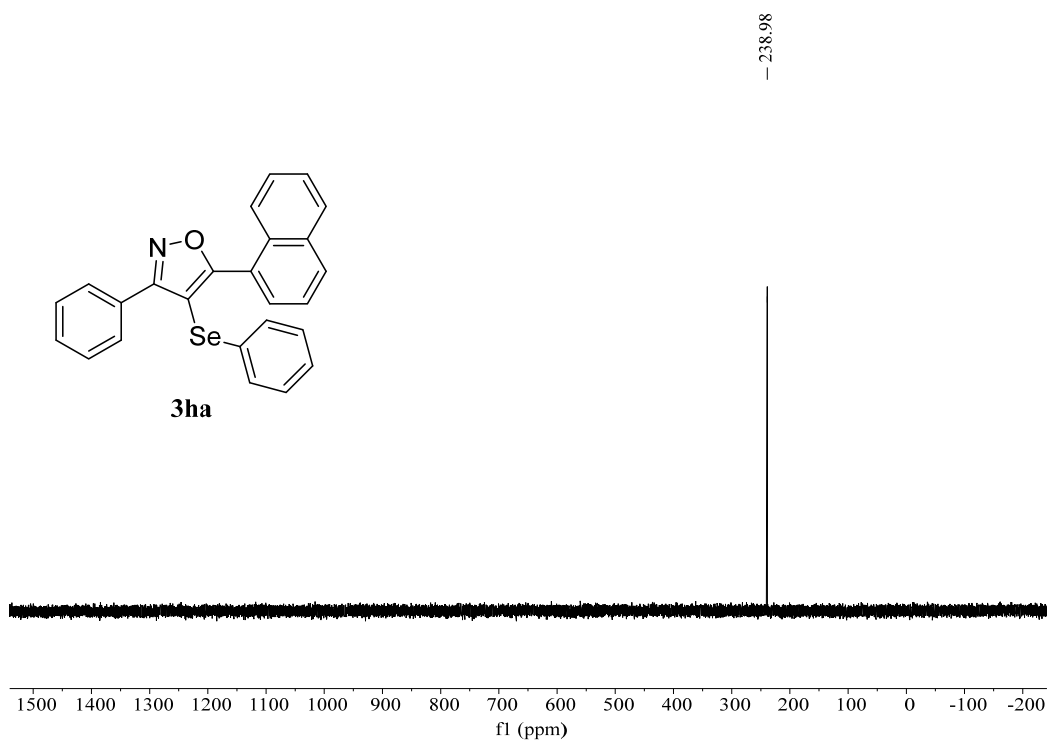

**Figure S94**  $^{77}\text{Se}$  NMR (95.5 MHz) spectrum of **3ha** in  $\text{CDCl}_3$

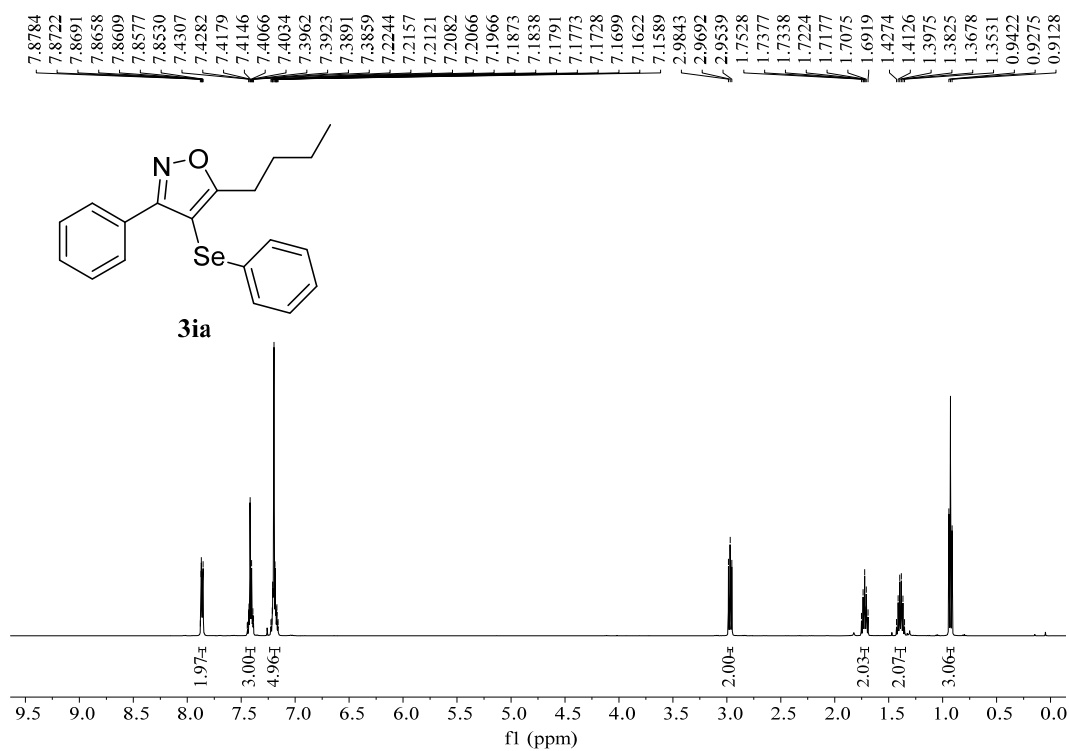

**Figure S95** <sup>1</sup>H NMR (500 MHz) spectrum of **3ia** in CDCl<sub>3</sub>

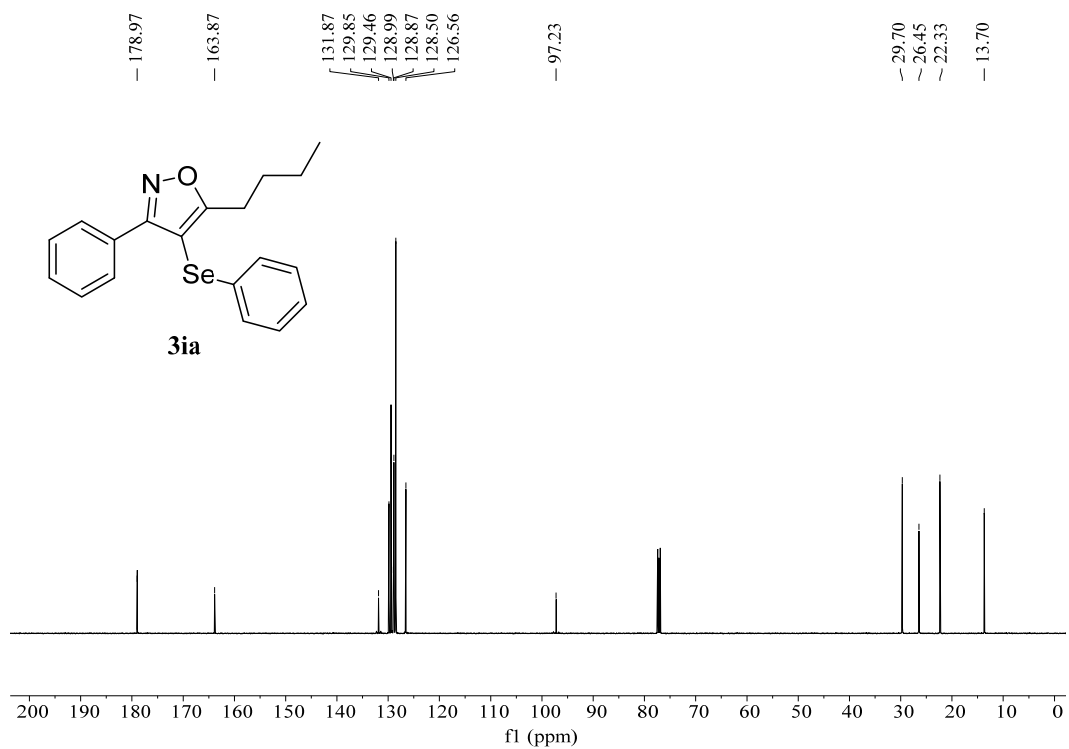

**Figure S96** <sup>13</sup>C NMR (125 MHz) spectrum of **3ia** in CDCl<sub>3</sub>

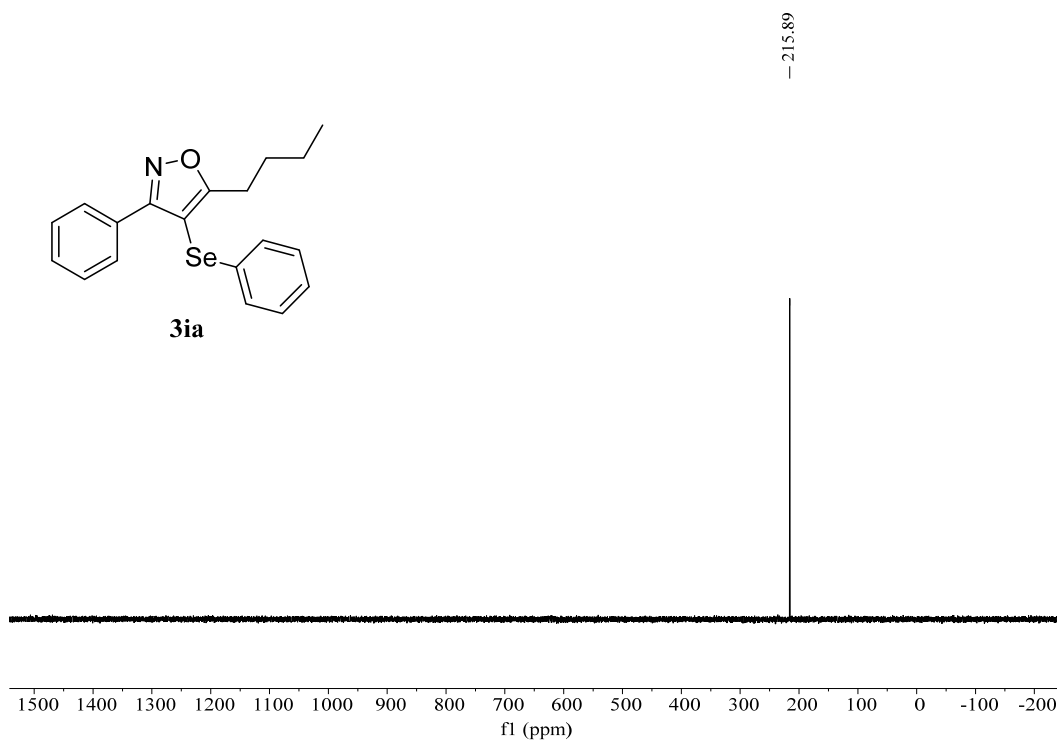

**Figure S97**  $^{77}\text{Se}$  NMR (95.5 MHz) spectrum of **3ia** in  $\text{CDCl}_3$

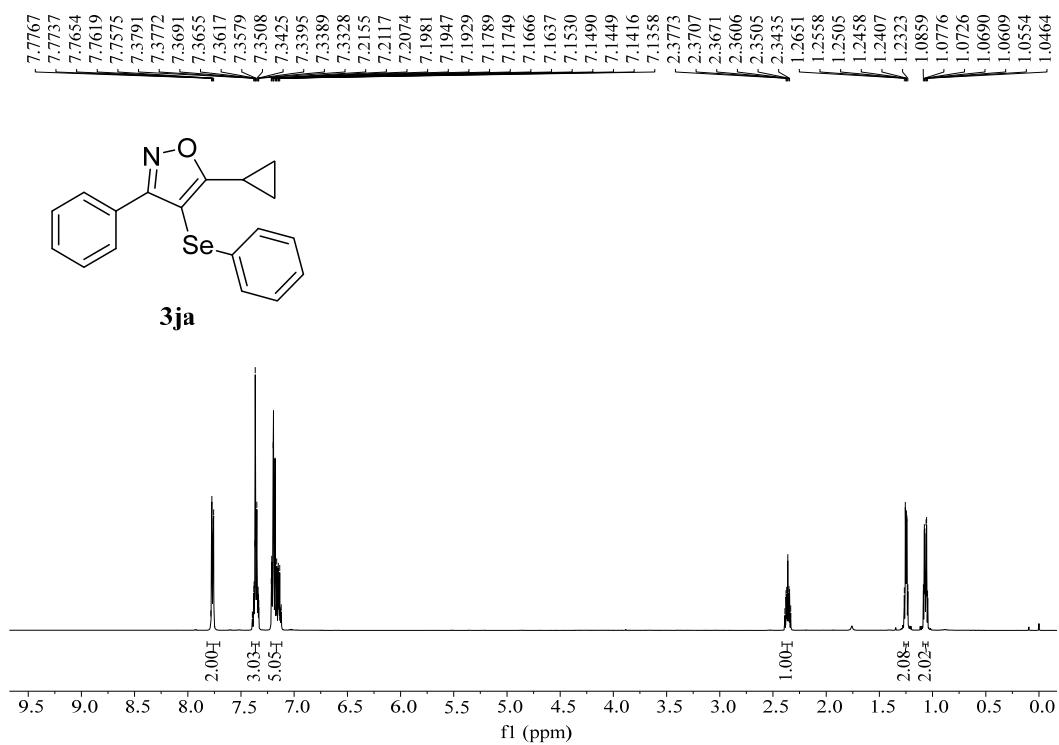

**Figure S98**  $^1\text{H}$  NMR (500 MHz) spectrum of **3ja** in  $\text{CDCl}_3$

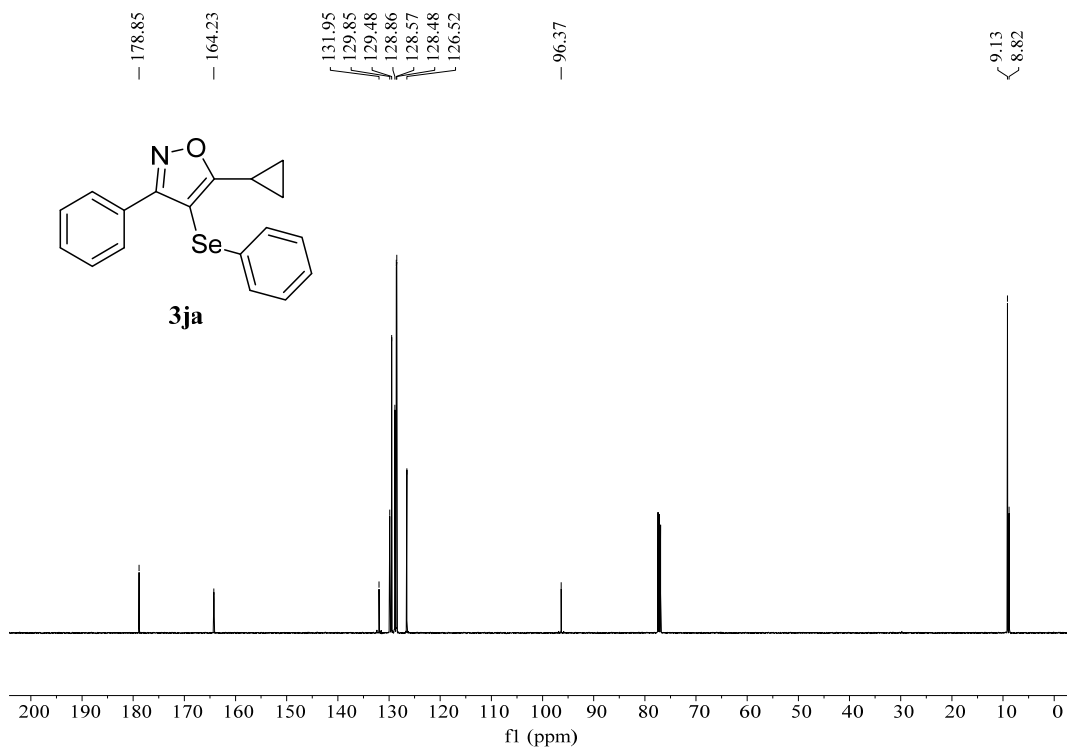

**Figure S99** <sup>13</sup>C NMR (125 MHz) spectrum of **3ja** in CDCl<sub>3</sub>

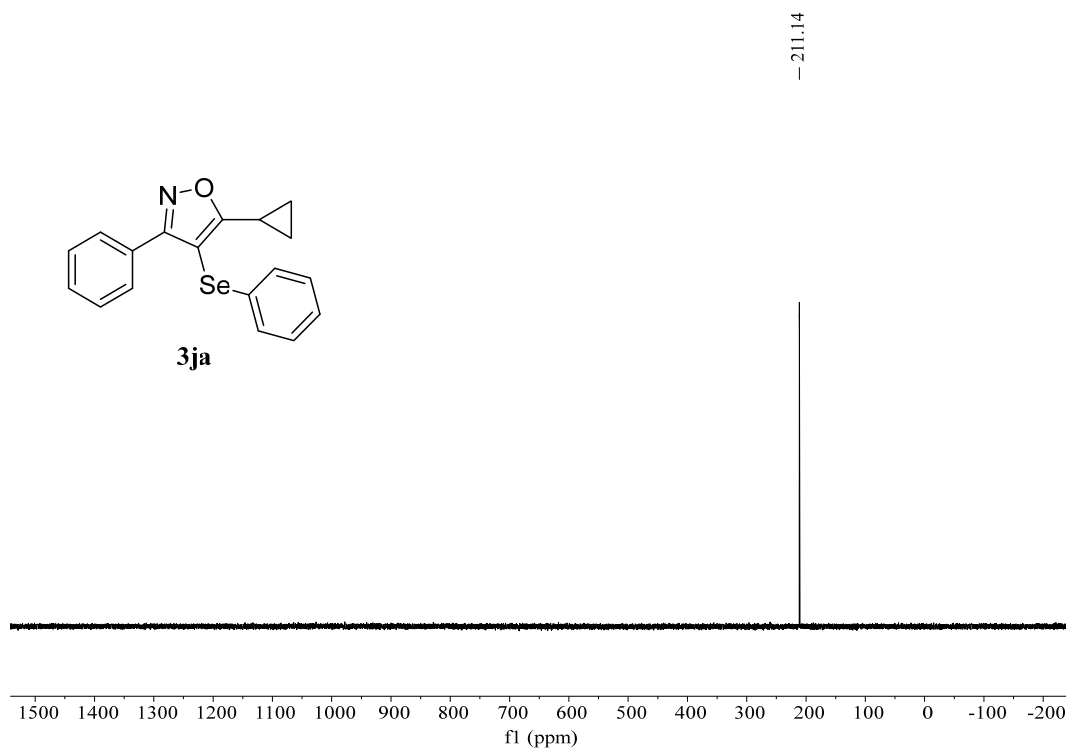

**Figure S100** <sup>77</sup>Se NMR (95.5 MHz) spectrum of **3ja** in CDCl<sub>3</sub>



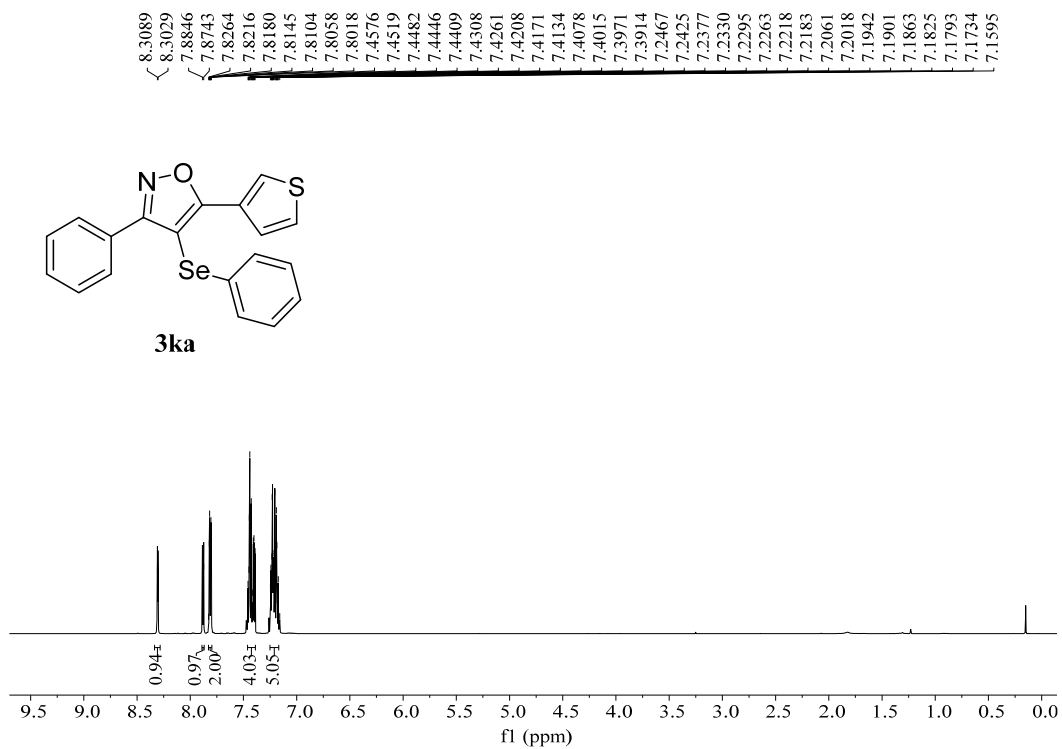

**Figure S101**  $^1\text{H}$  NMR (500 MHz) spectrum of **3ka** in  $\text{CDCl}_3$

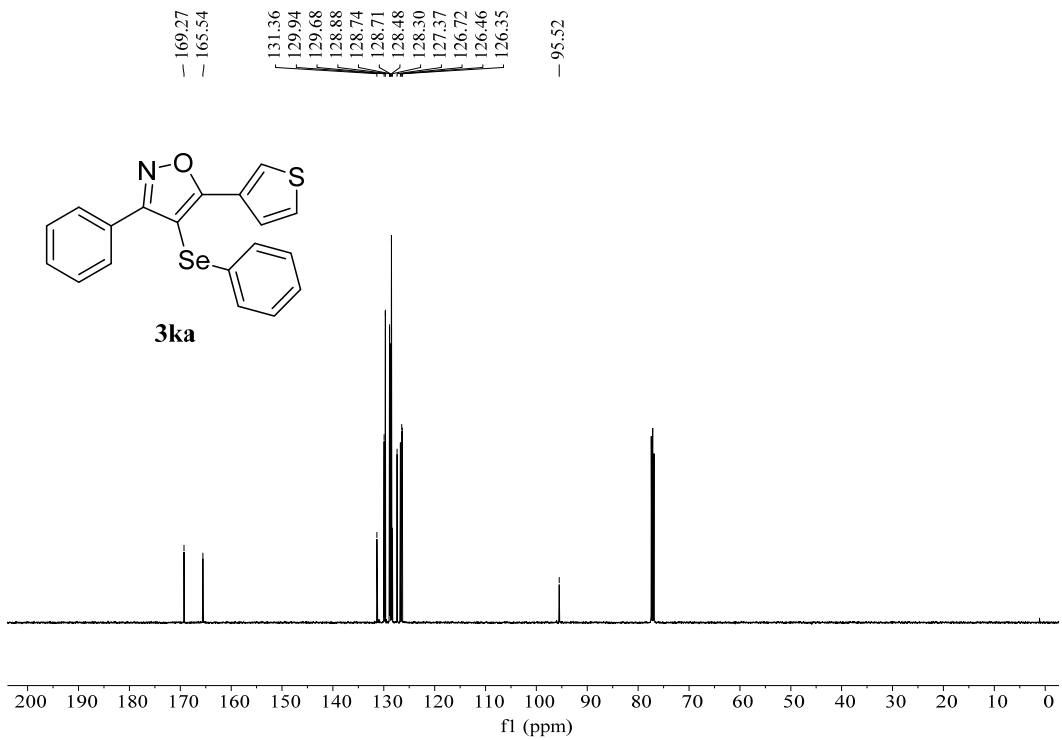

**Figure S102**  $^{13}\text{C}$  NMR (125 MHz) spectrum of **3ka** in  $\text{CDCl}_3$

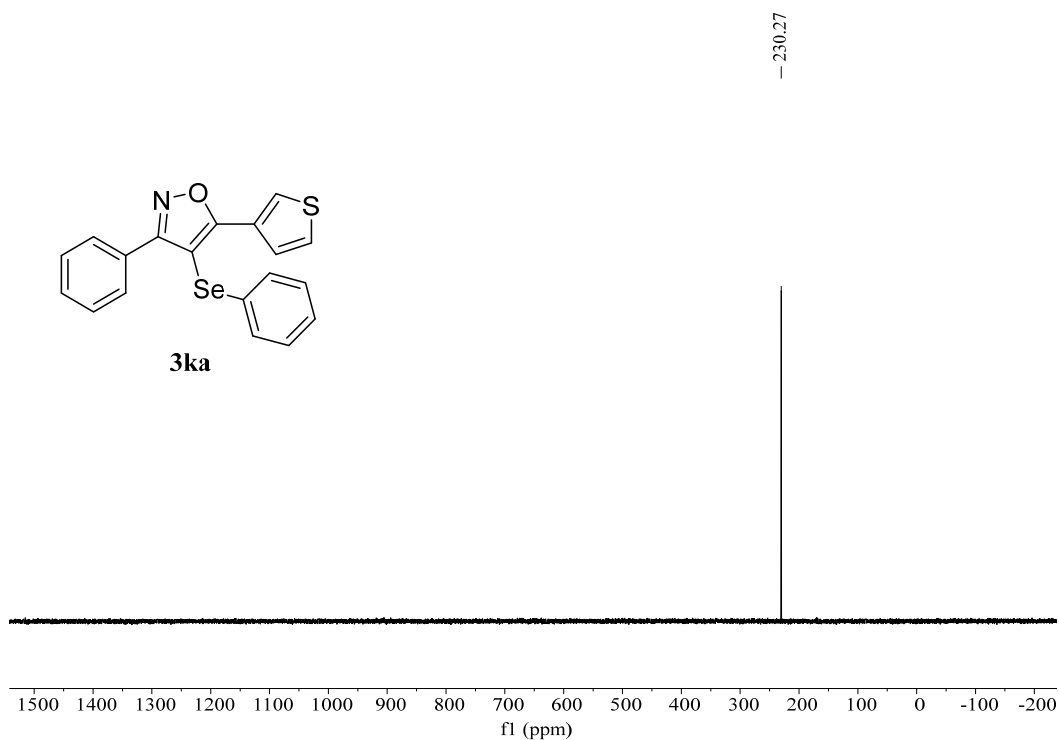

**Figure S103**  $^{77}\text{Se}$  NMR (95.5 MHz) spectrum of **3ka** in  $\text{CDCl}_3$

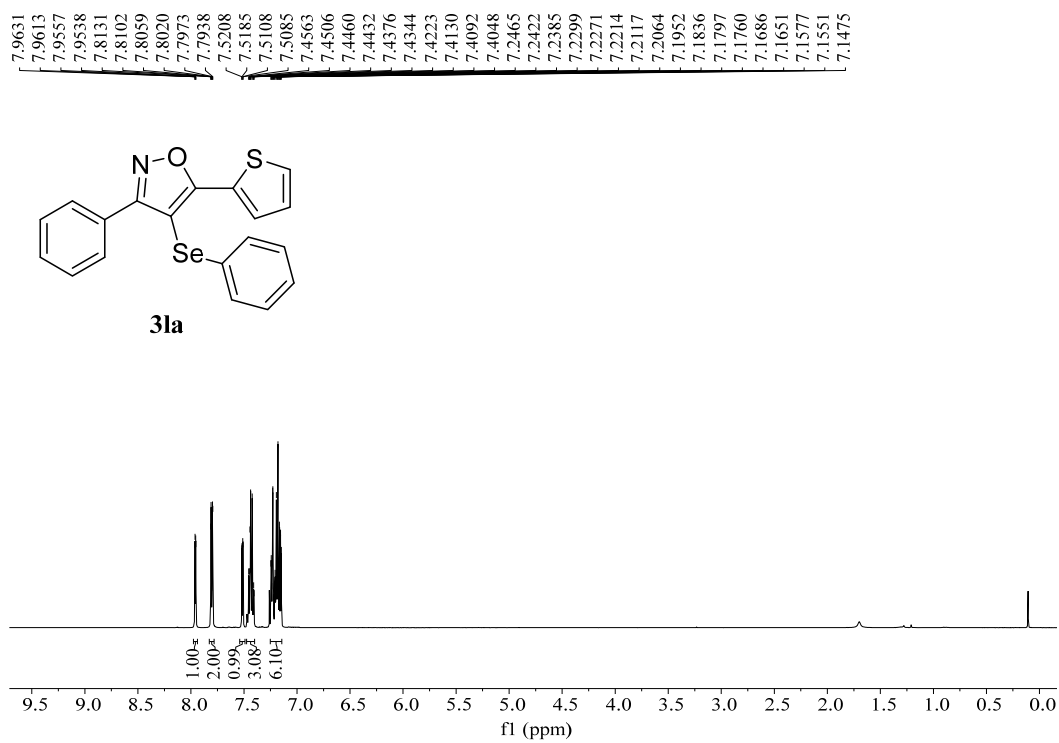

**Figure S104**  $^1\text{H}$  NMR (500 MHz) spectrum of **3la** in  $\text{CDCl}_3$

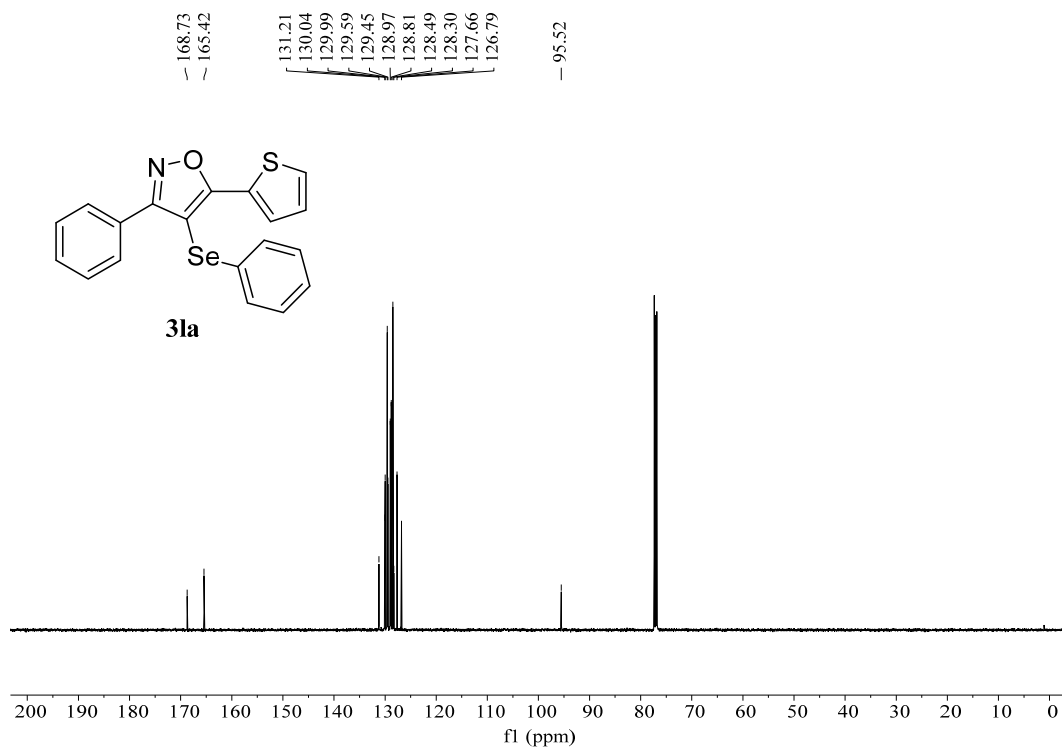

**Figure S105** <sup>13</sup>C NMR (125 MHz) spectrum of **3la** in CDCl<sub>3</sub>

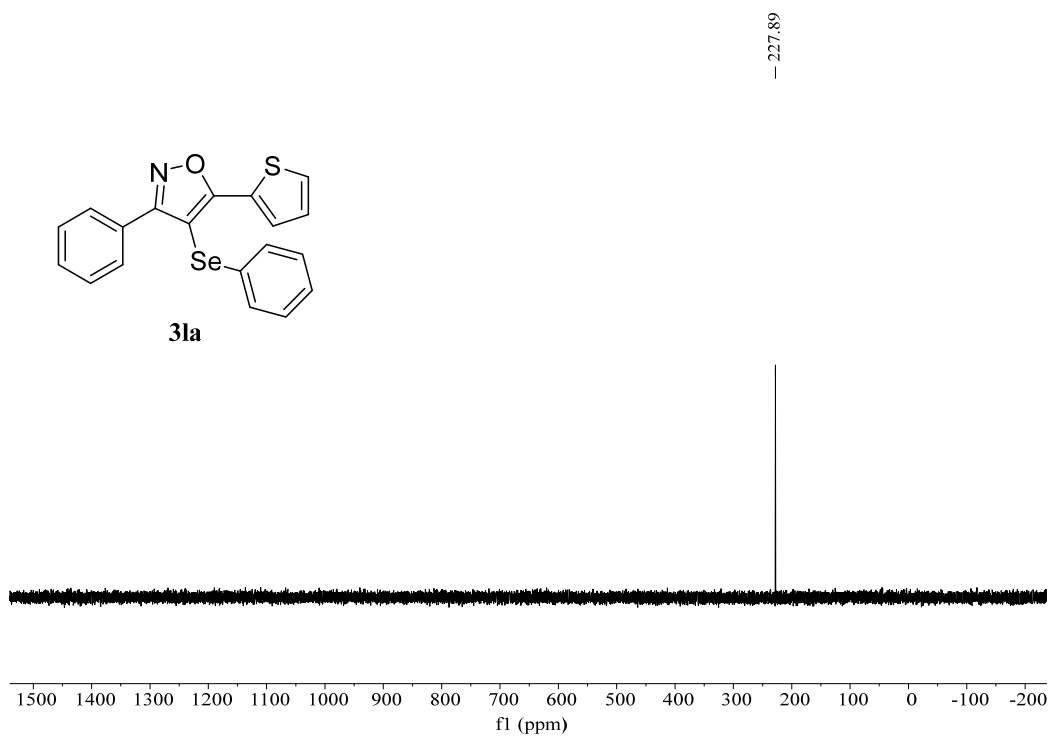

**Figure S106** <sup>77</sup>Se NMR (95.5 MHz) spectrum of **3la** in CDCl<sub>3</sub>

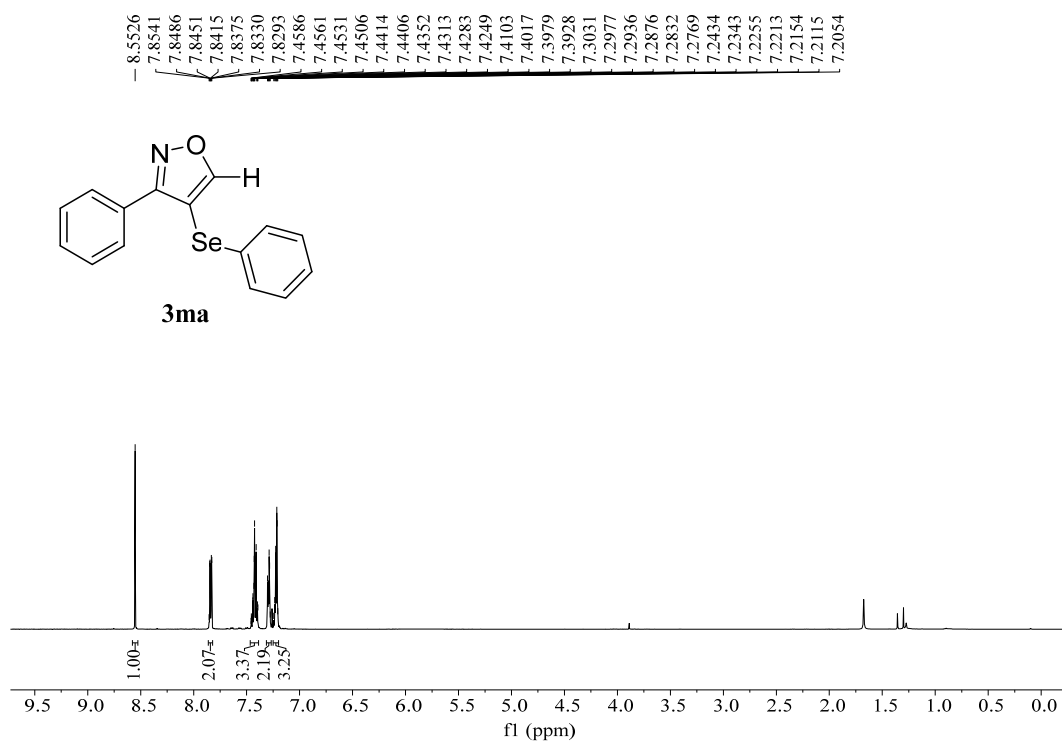

**Figure S107**  $^1\text{H}$  NMR (500 MHz) spectrum of **3ma** in  $\text{CDCl}_3$

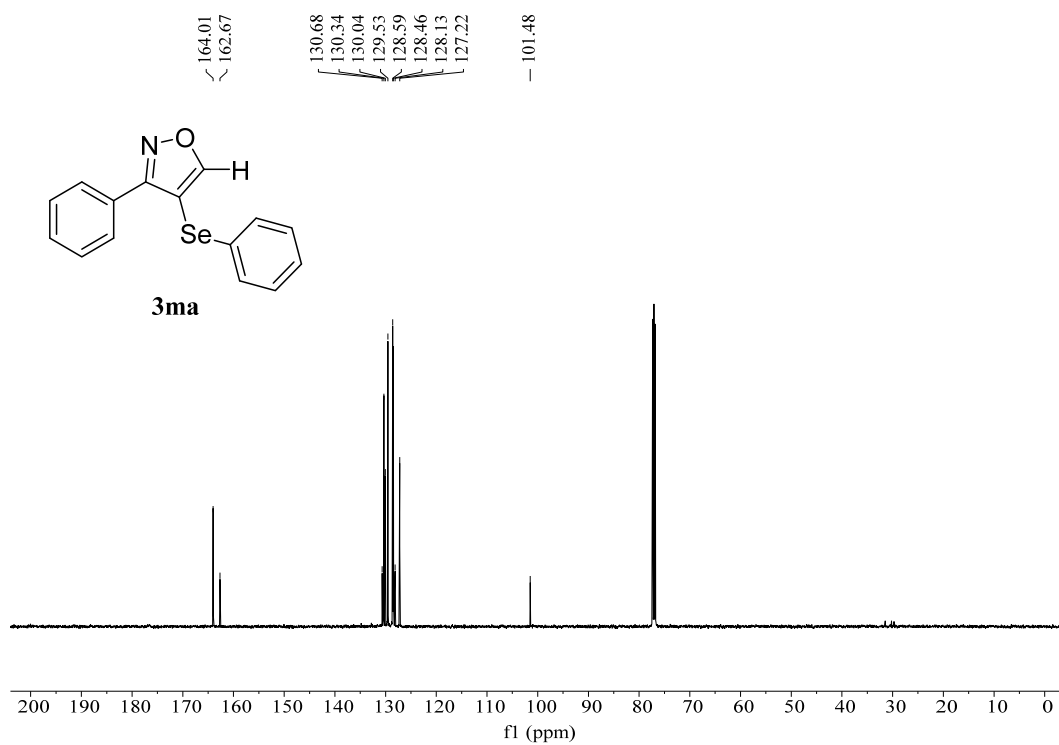

**Figure S108**  $^{13}\text{C}$  NMR (125 MHz) spectrum of **3ma** in  $\text{CDCl}_3$

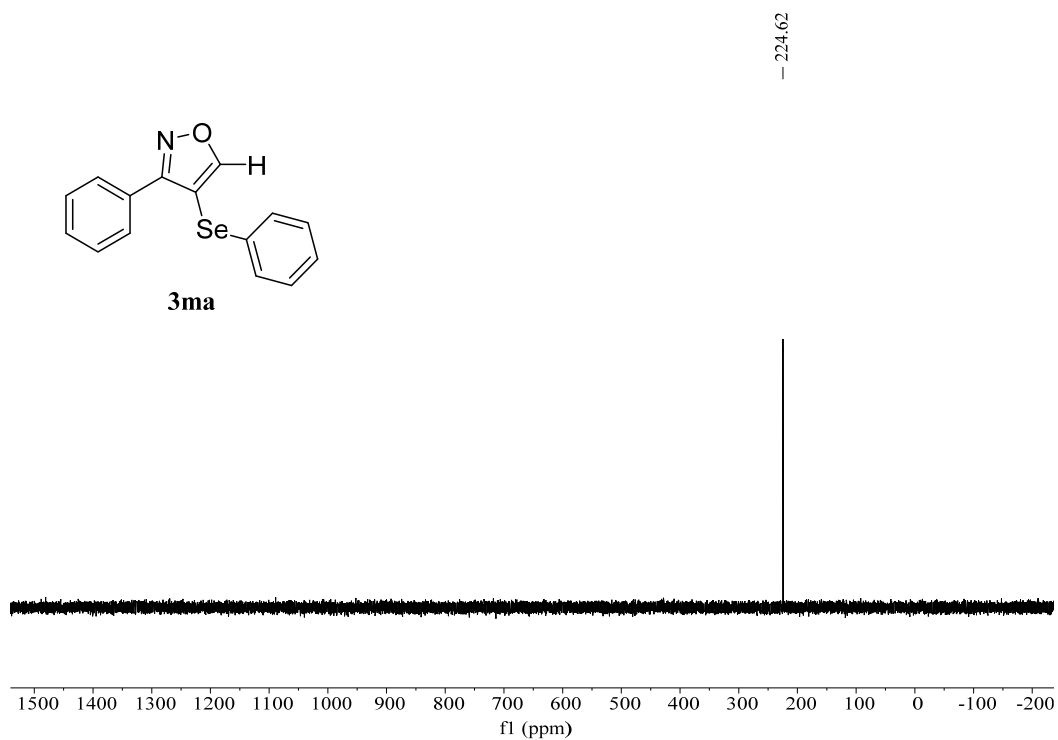

**Figure S109** <sup>77</sup>Se NMR (95.5 MHz) spectrum of **3ma** in CDCl<sub>3</sub>

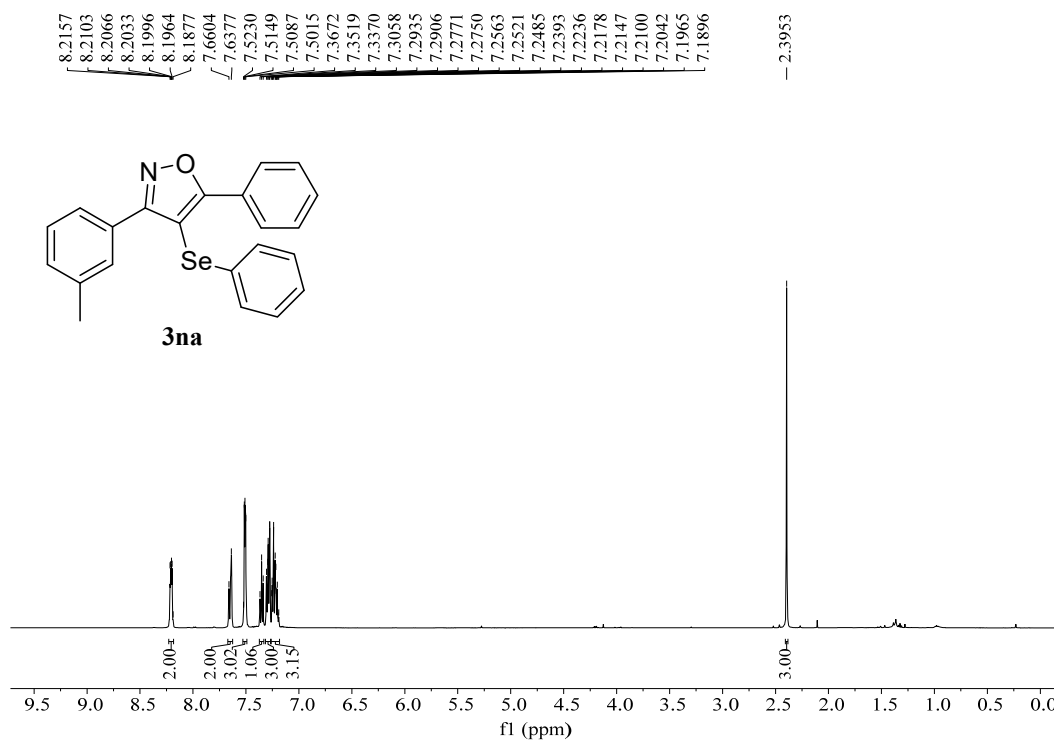

**Figure S110** <sup>1</sup>H NMR (500 MHz) spectrum of **3na** in CDCl<sub>3</sub>

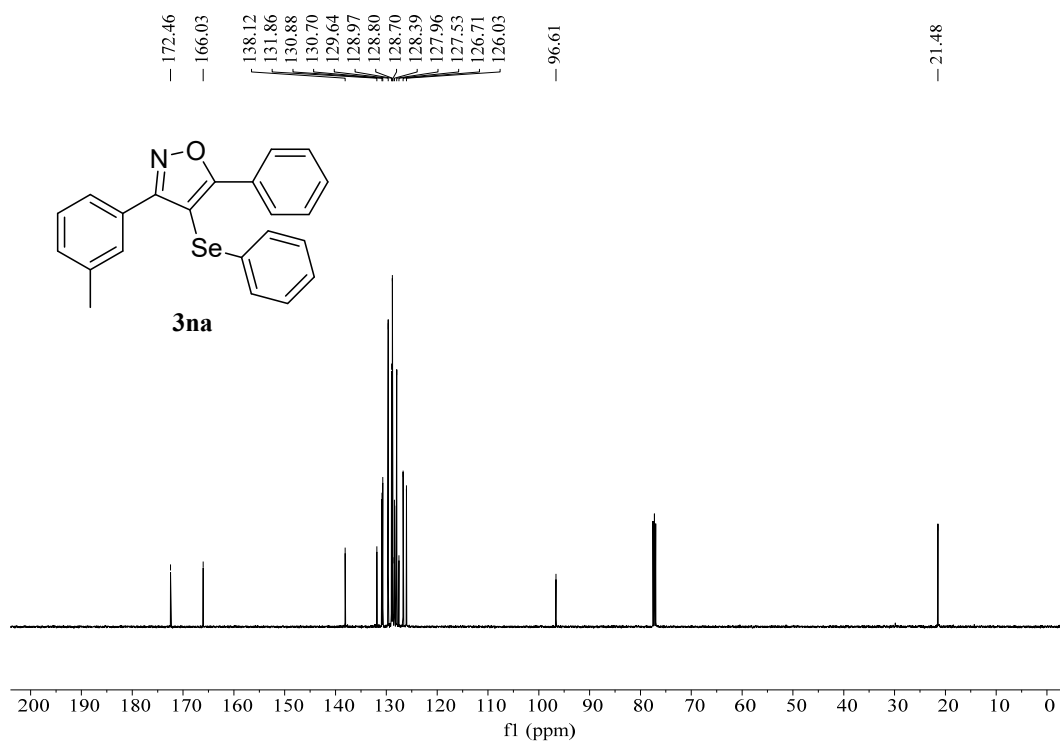

**Figure S111**  $^{13}\text{C}$  NMR (125 MHz) spectrum of **3na** in  $\text{CDCl}_3$

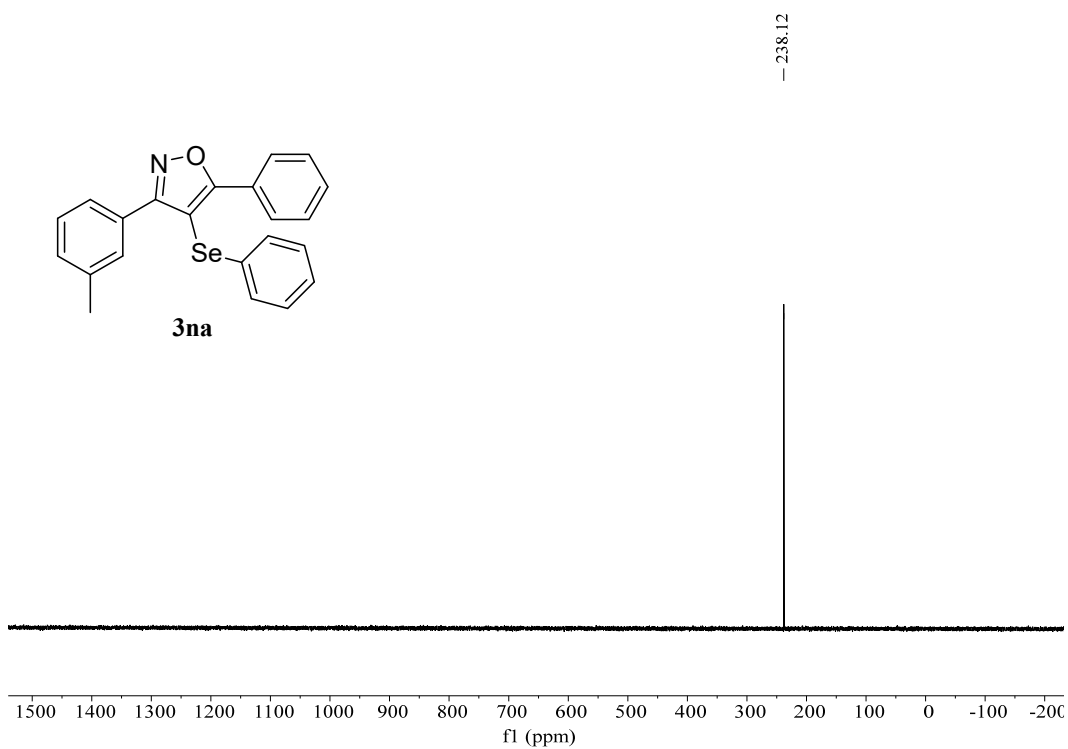

**Figure S112**  $^{77}\text{Se}$  NMR (95.5 MHz) spectrum of **3na** in  $\text{CDCl}_3$

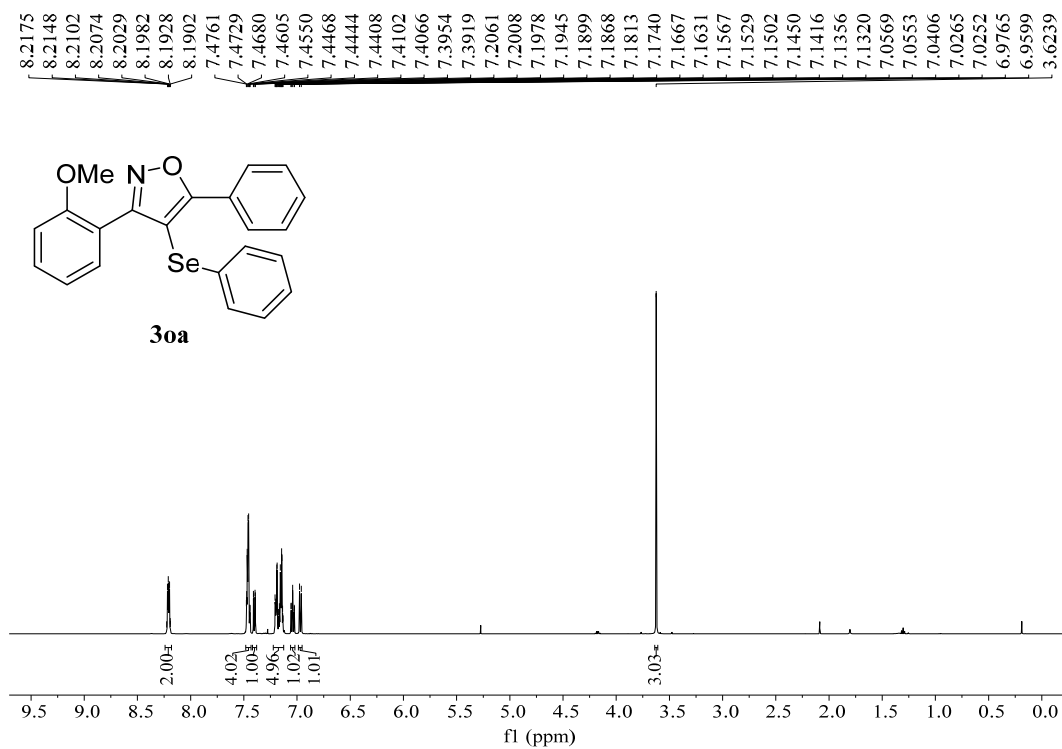

**Figure S113** <sup>1</sup>H NMR (500 MHz) spectrum of **3oa** in CDCl<sub>3</sub>

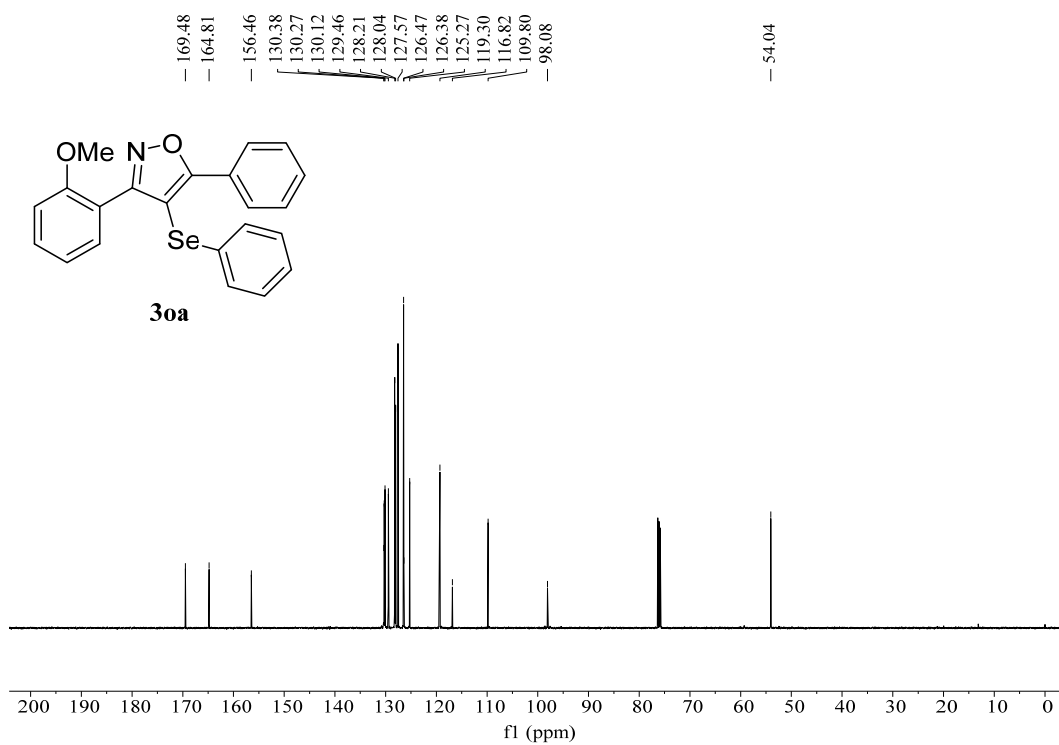

**Figure S114** <sup>13</sup>C NMR (125 MHz) spectrum of **3oa** in CDCl<sub>3</sub>

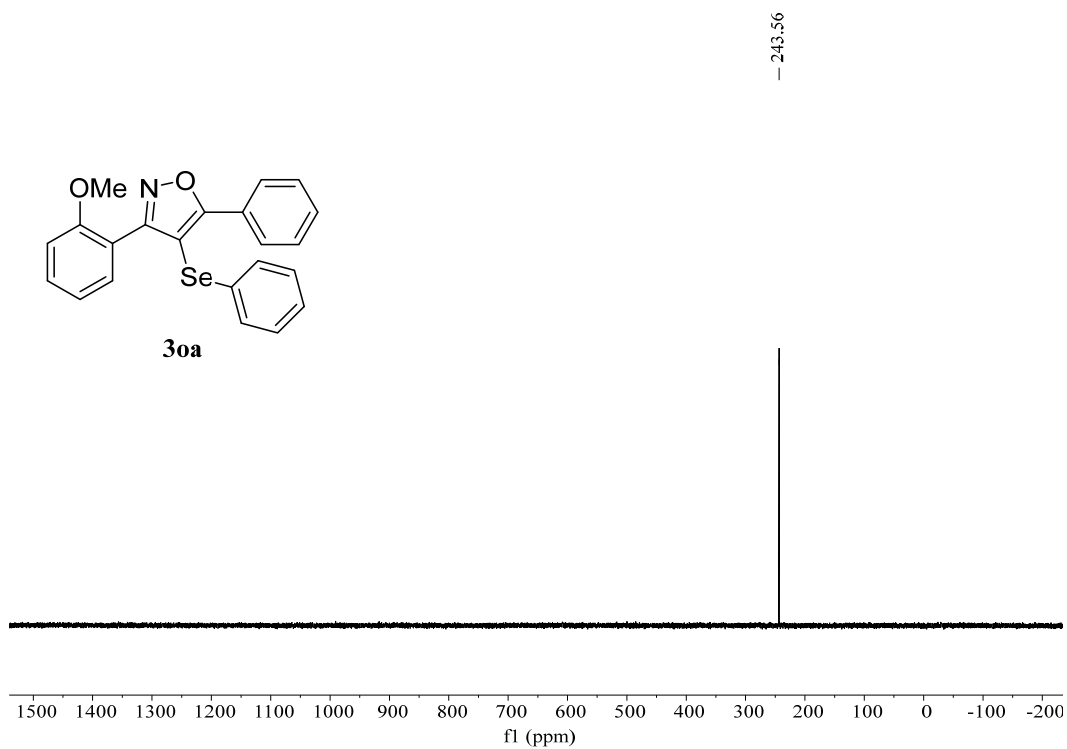

**Figure S115**  $^{77}\text{Se}$  NMR (95.5 MHz) spectrum of **3oa** in  $\text{CDCl}_3$

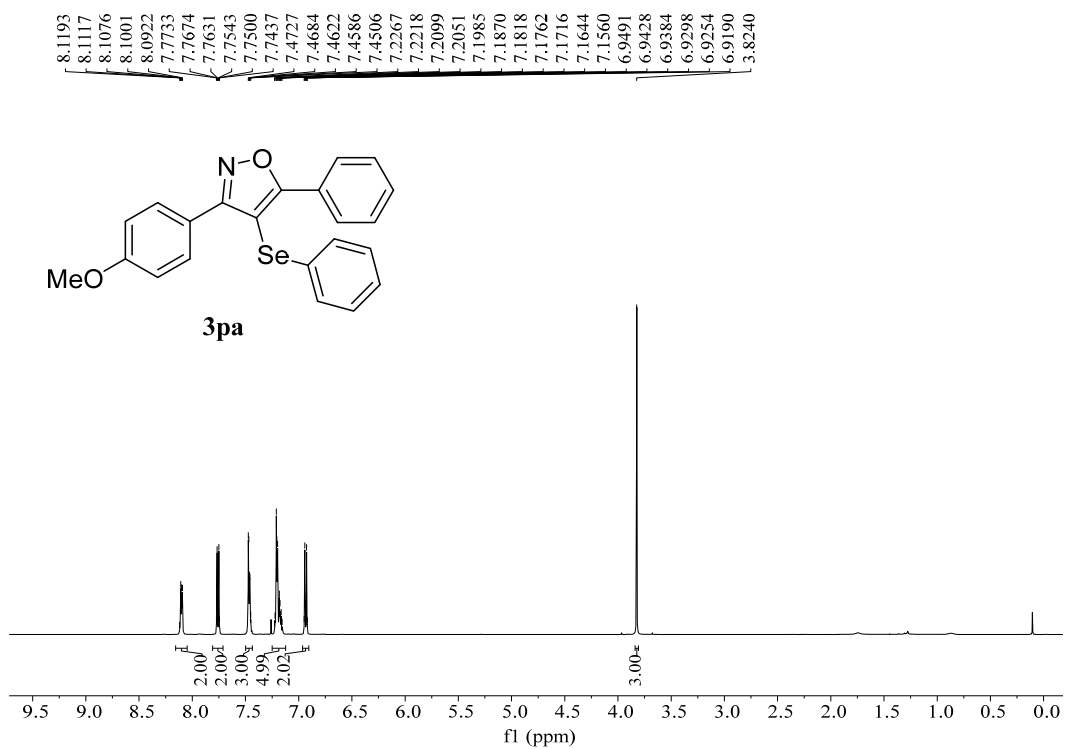

**Figure S116**  $^1\text{H}$  NMR (500 MHz) spectrum of **3pa** in  $\text{CDCl}_3$



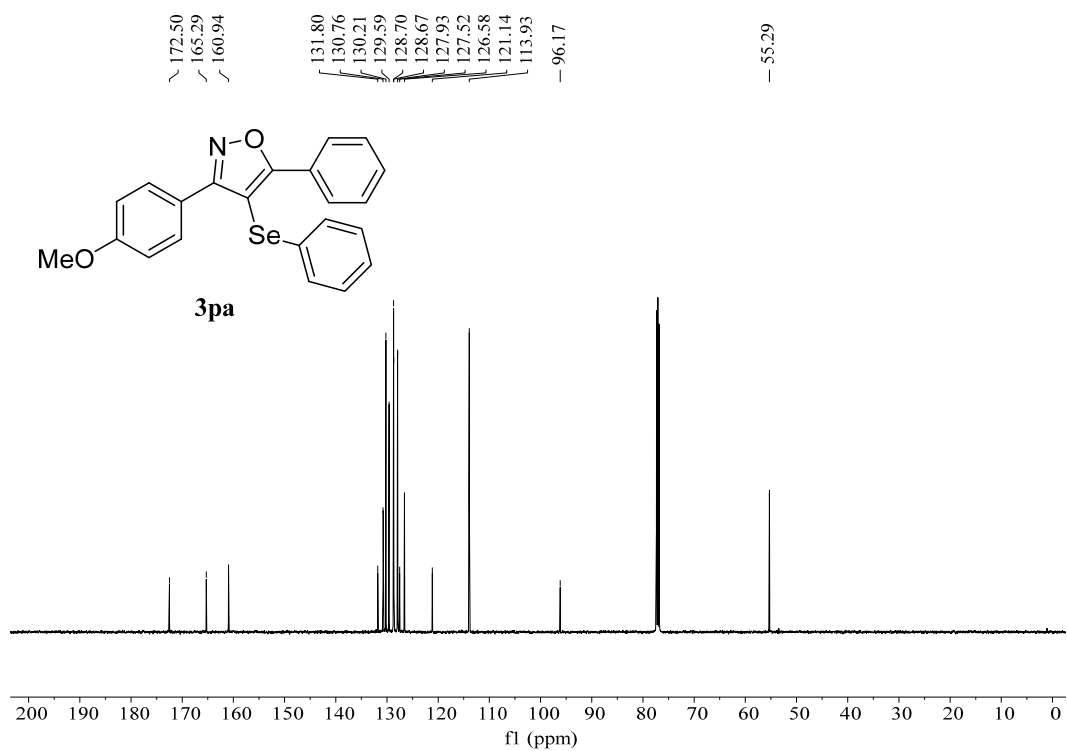

**Figure S117** <sup>13</sup>C NMR (125 MHz) spectrum of **3pa** in CDCl<sub>3</sub>

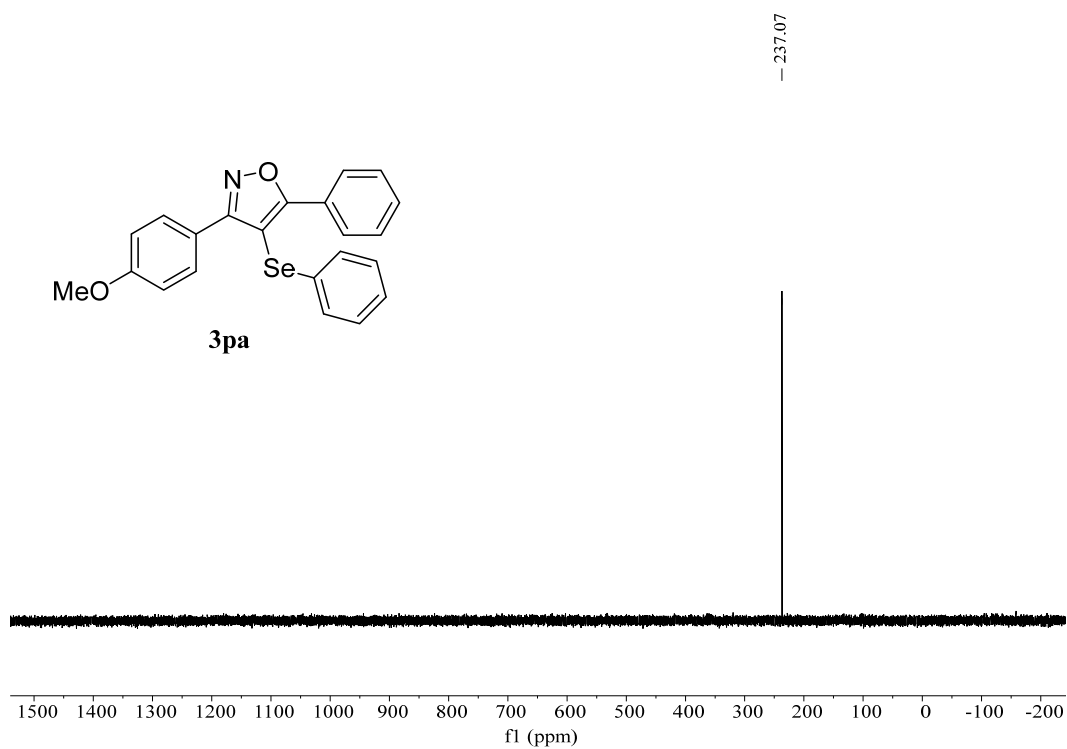

**Figure S118** <sup>77</sup>Se NMR (95.5 MHz) spectrum of **3pa** in CDCl<sub>3</sub>

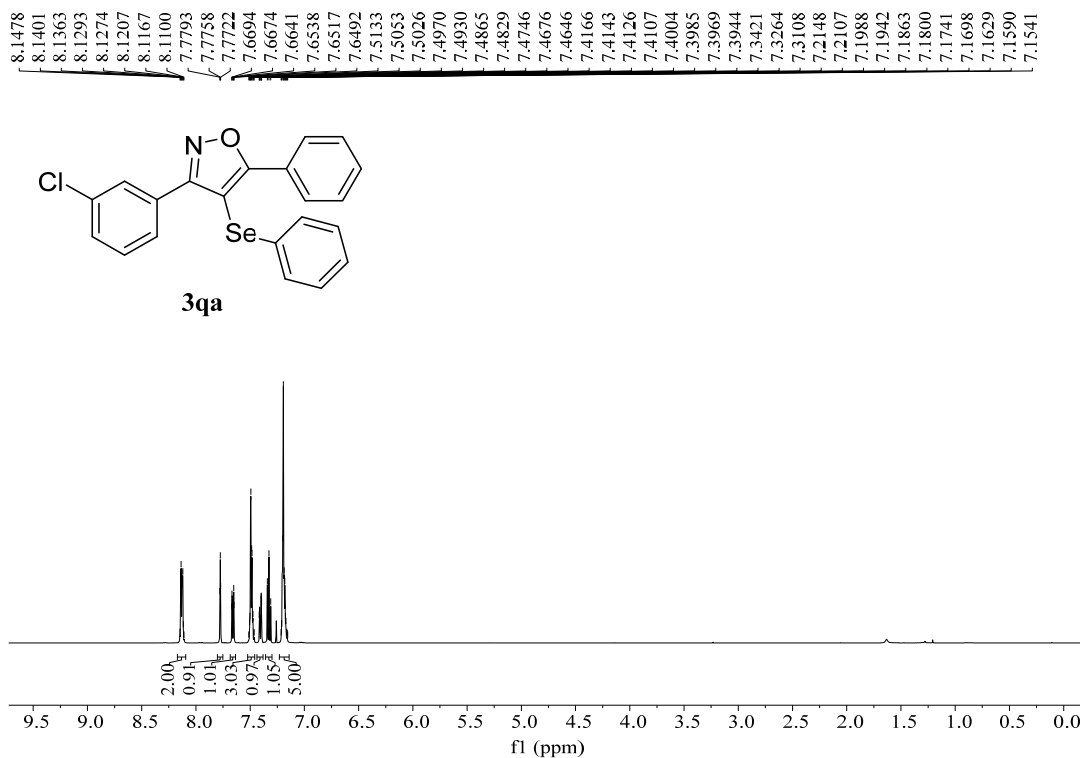

**Figure S119**  $^1\text{H}$  NMR (500 MHz) spectrum of **3qa** in  $\text{CDCl}_3$

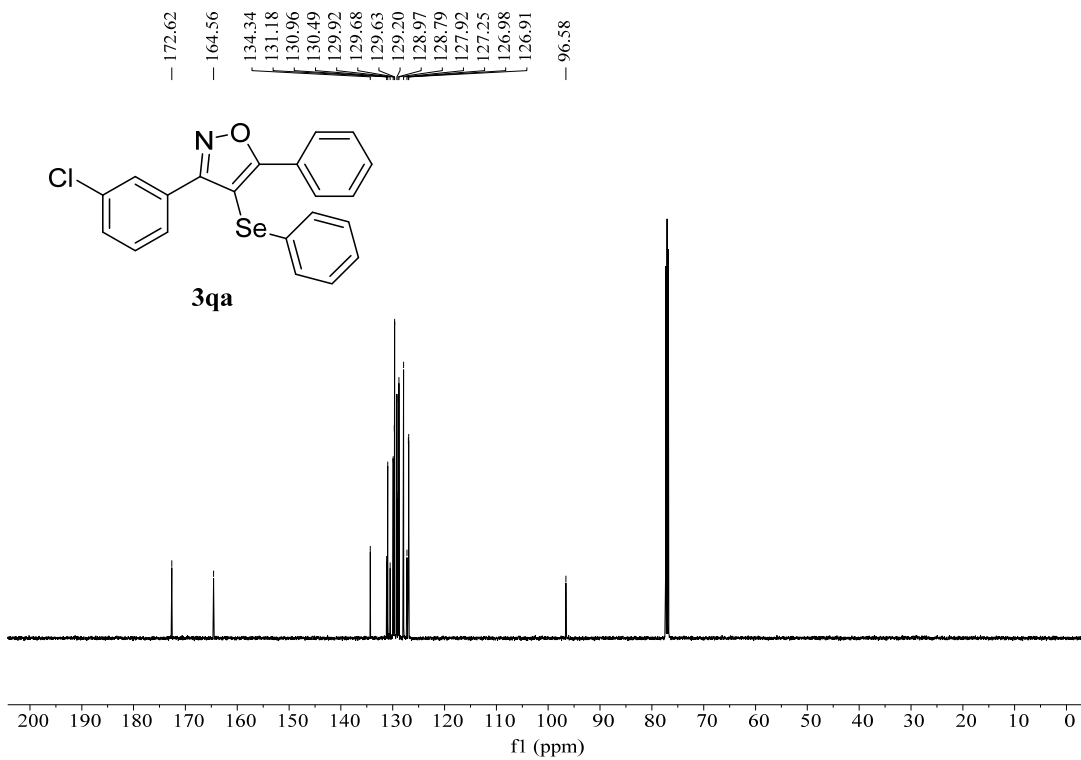

**Figure S120**  $^{13}\text{C}$  NMR (125 MHz) spectrum of **3qa** in  $\text{CDCl}_3$

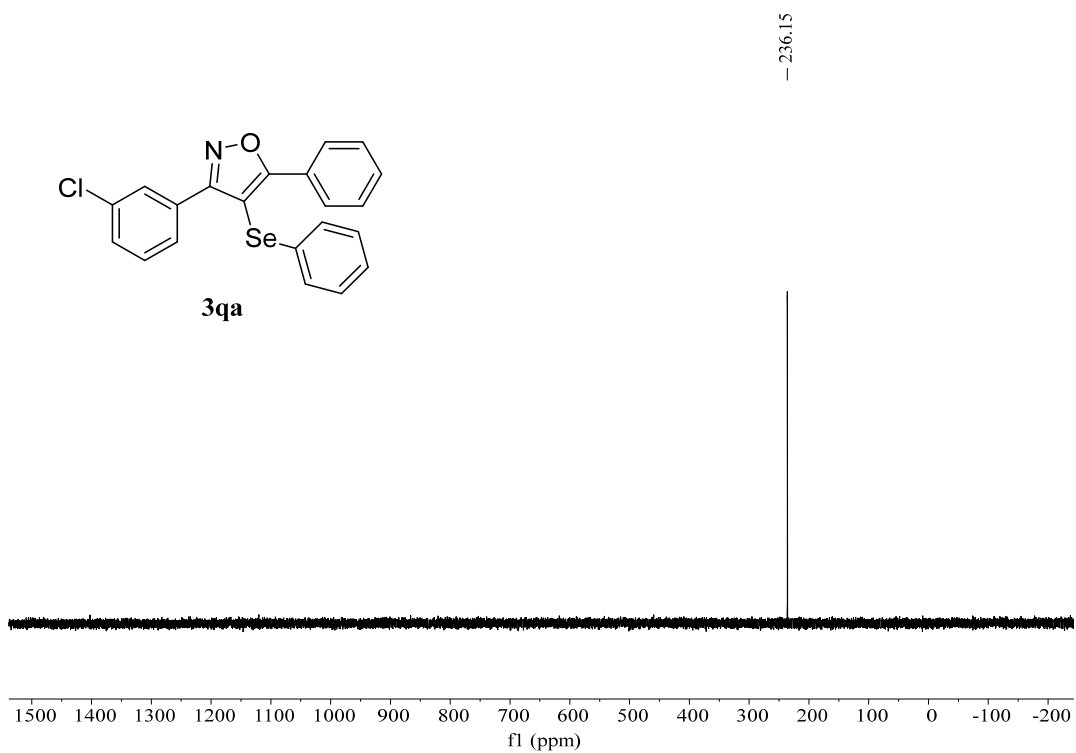

**Figure S121**  $^{77}\text{Se}$  NMR (95.5 MHz) spectrum of **3qa** in  $\text{CDCl}_3$

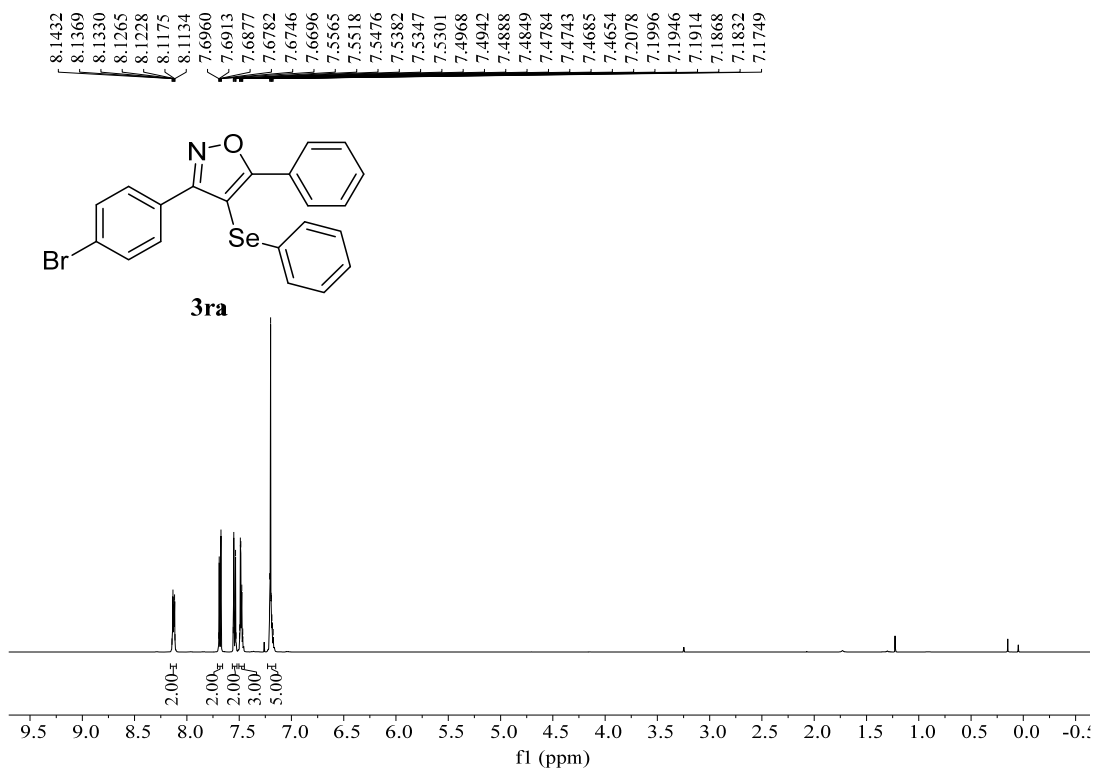

**Figure S122**  $^1\text{H}$  NMR (500 MHz) spectrum of **3ra** in  $\text{CDCl}_3$

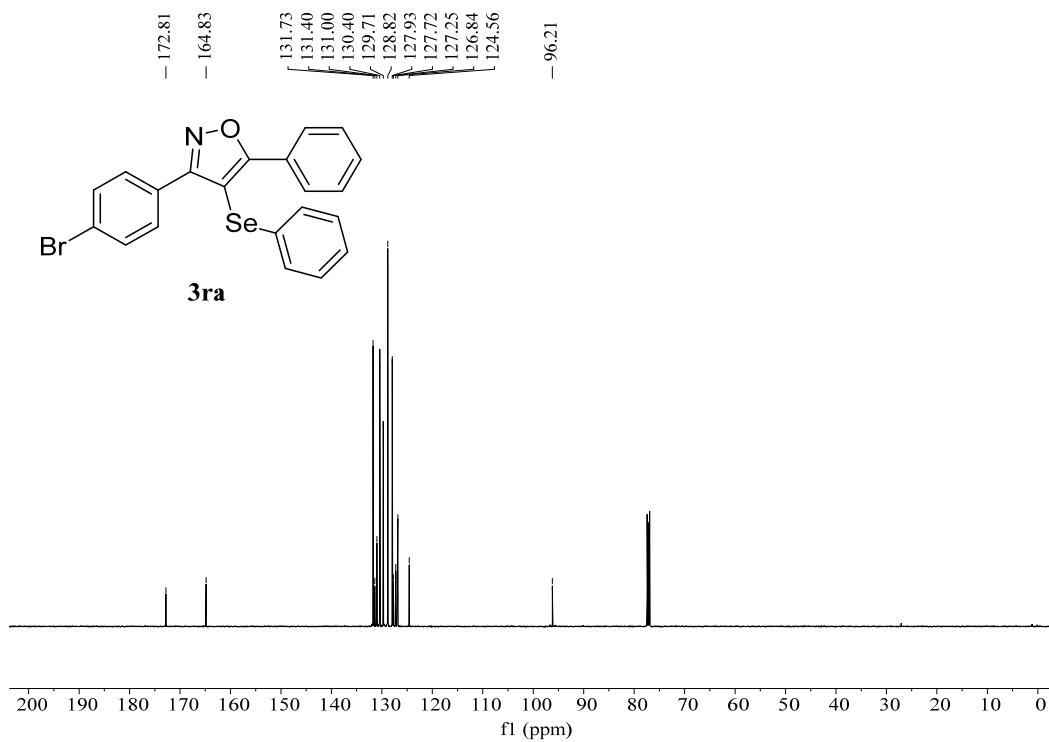

**Figure S123** <sup>13</sup>C NMR (125 MHz) spectrum of **3ra** in CDCl<sub>3</sub>

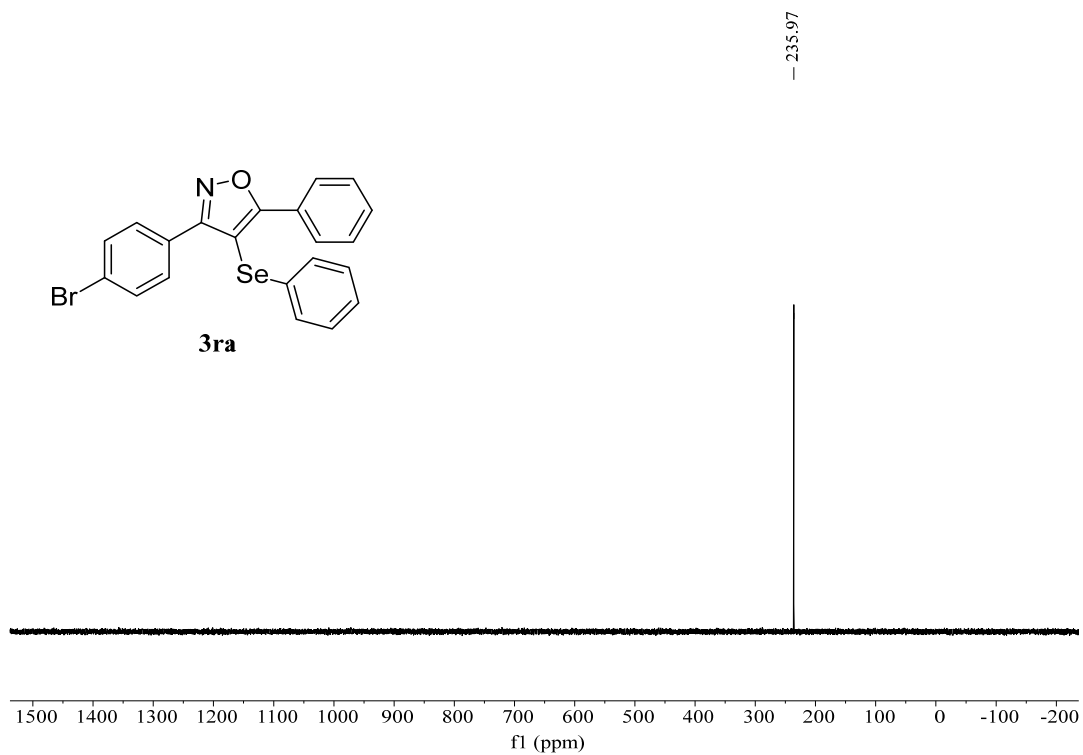

**Figure S124** <sup>77</sup>Se NMR (95.5 MHz) spectrum of **3ra** in CDCl<sub>3</sub>

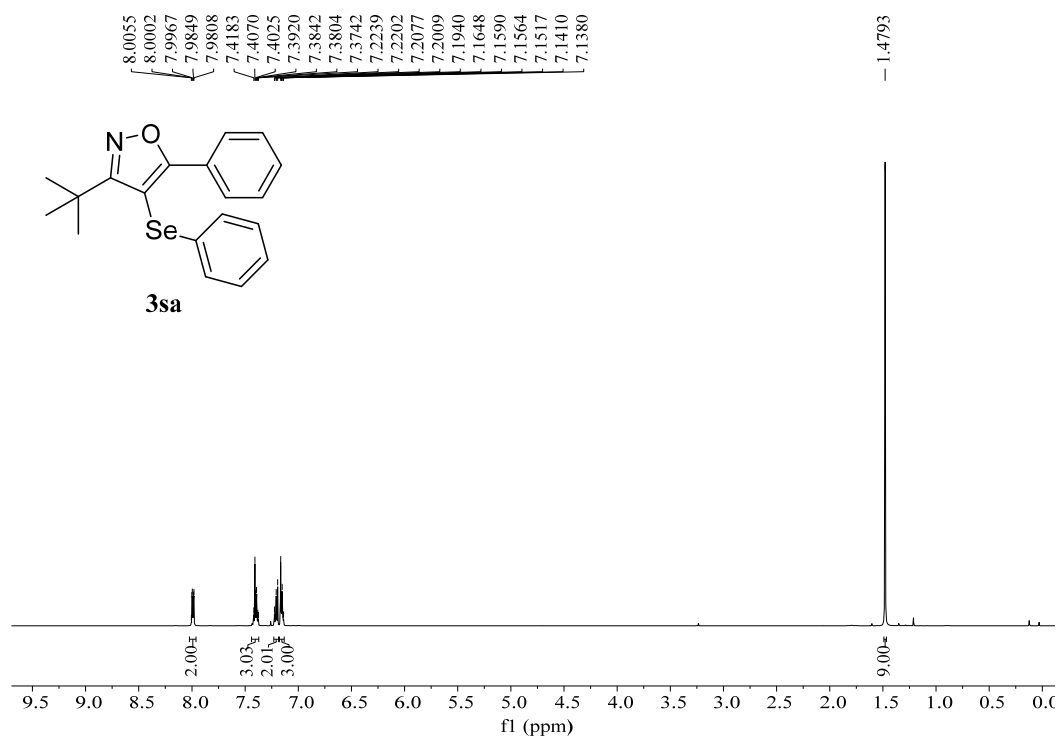

Figure S125  $^1\text{H NMR}$  (500 MHz) spectrum of **3sa** in  $\text{CDCl}_3$

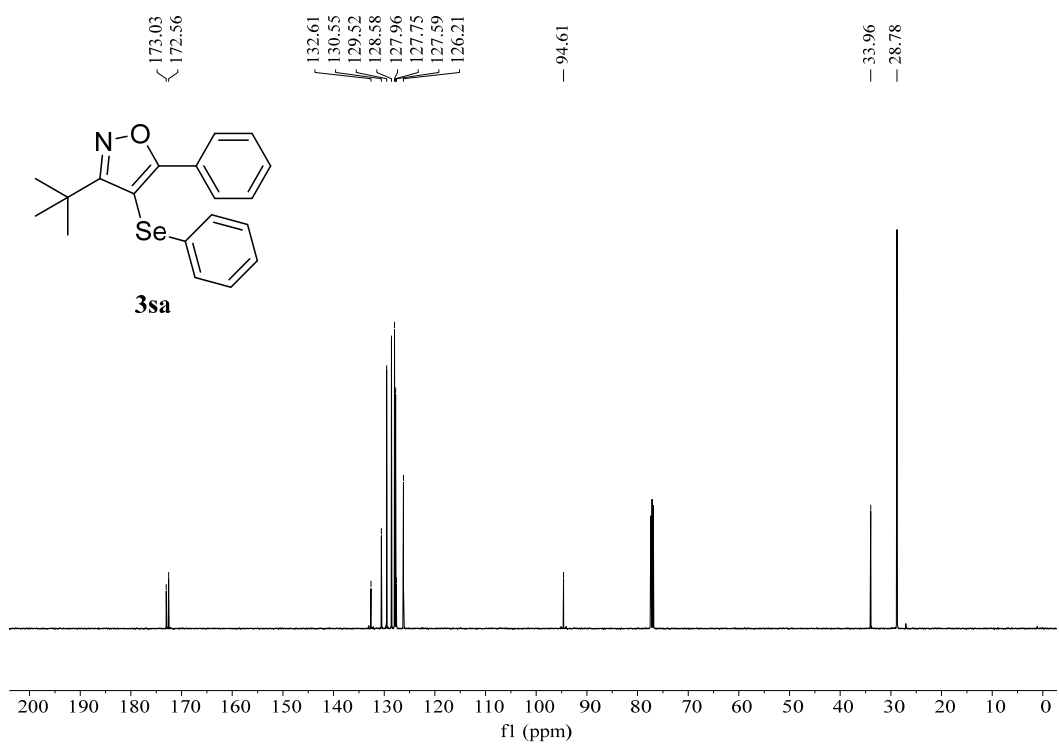

Figure S126  $^{13}\text{C NMR}$  (125 MHz) spectrum of **3sa** in  $\text{CDCl}_3$

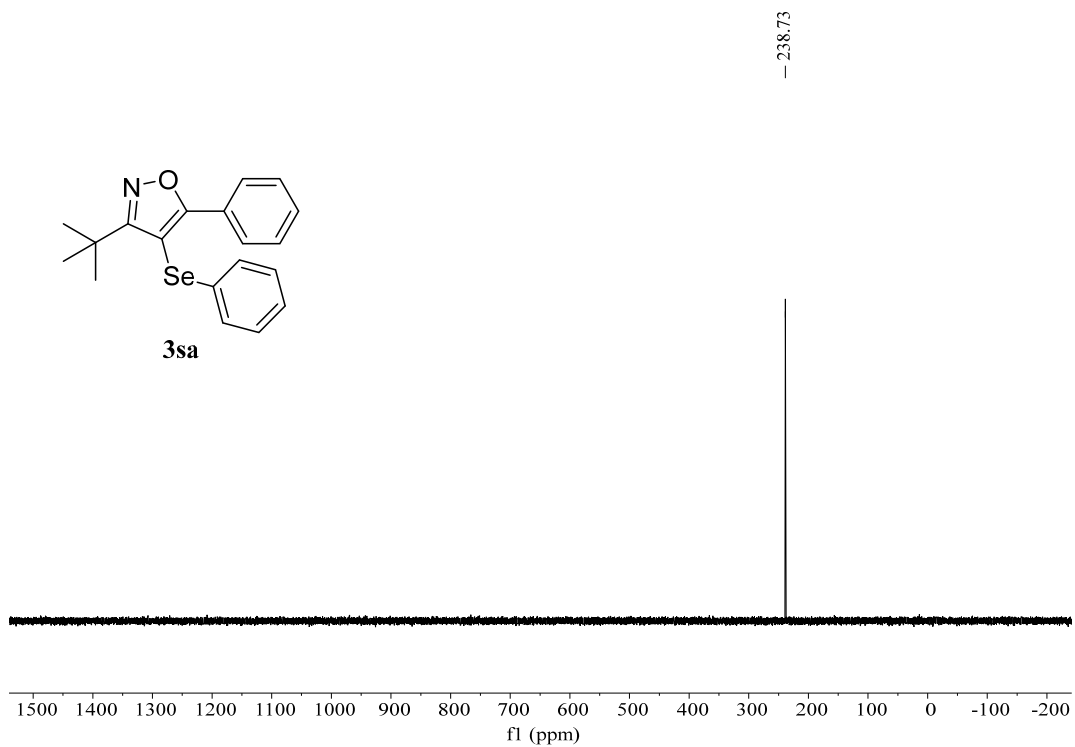

**Figure S127**  $^{77}\text{Se}$  NMR (95.5 MHz) spectrum of **3sa** in  $\text{CDCl}_3$

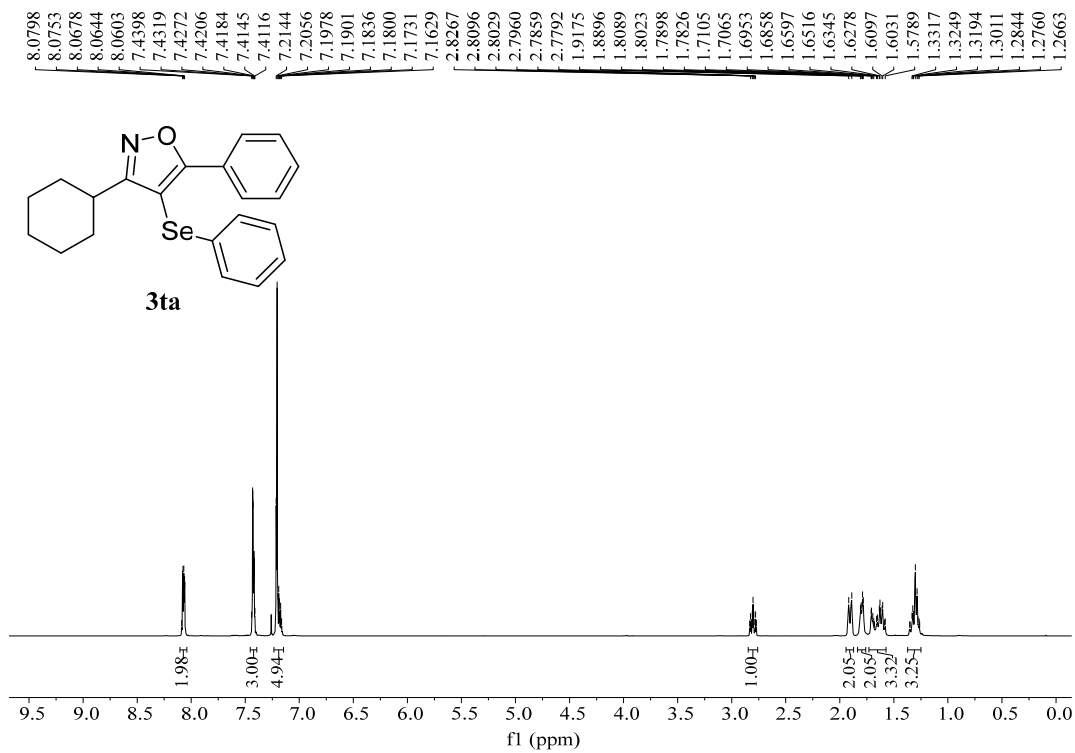

**Figure S128**  $^1\text{H}$  NMR (500 MHz) spectrum of **3ta** in  $\text{CDCl}_3$

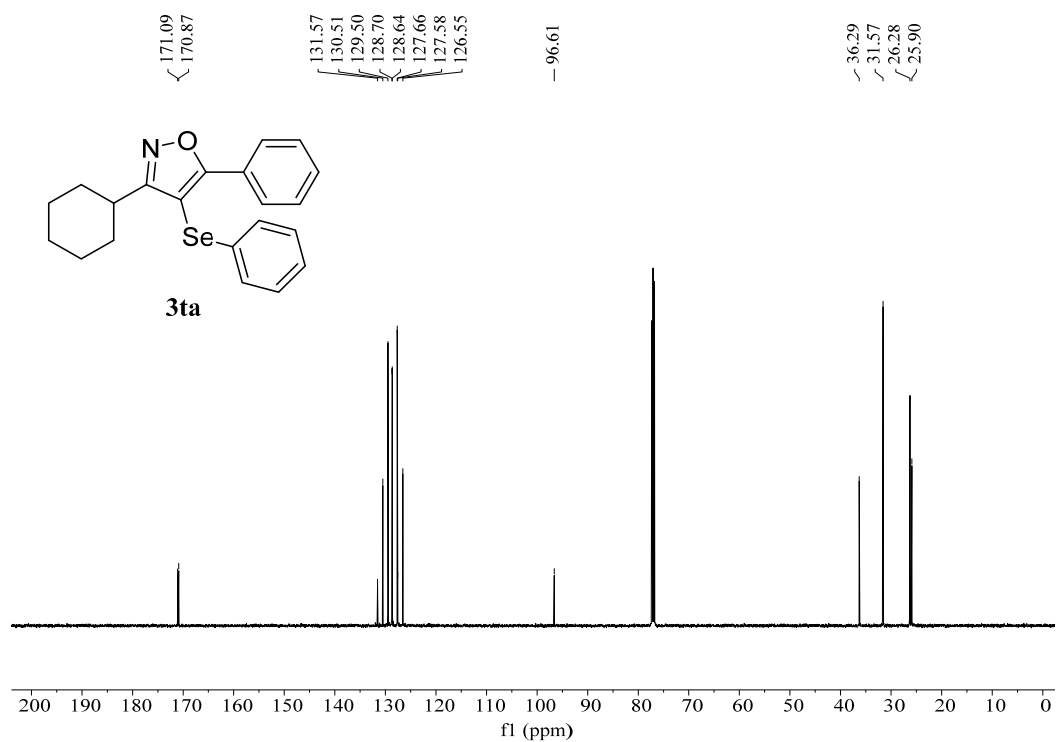

**Figure S129** <sup>13</sup>C NMR (125 MHz) spectrum of **3ta** in CDCl<sub>3</sub>

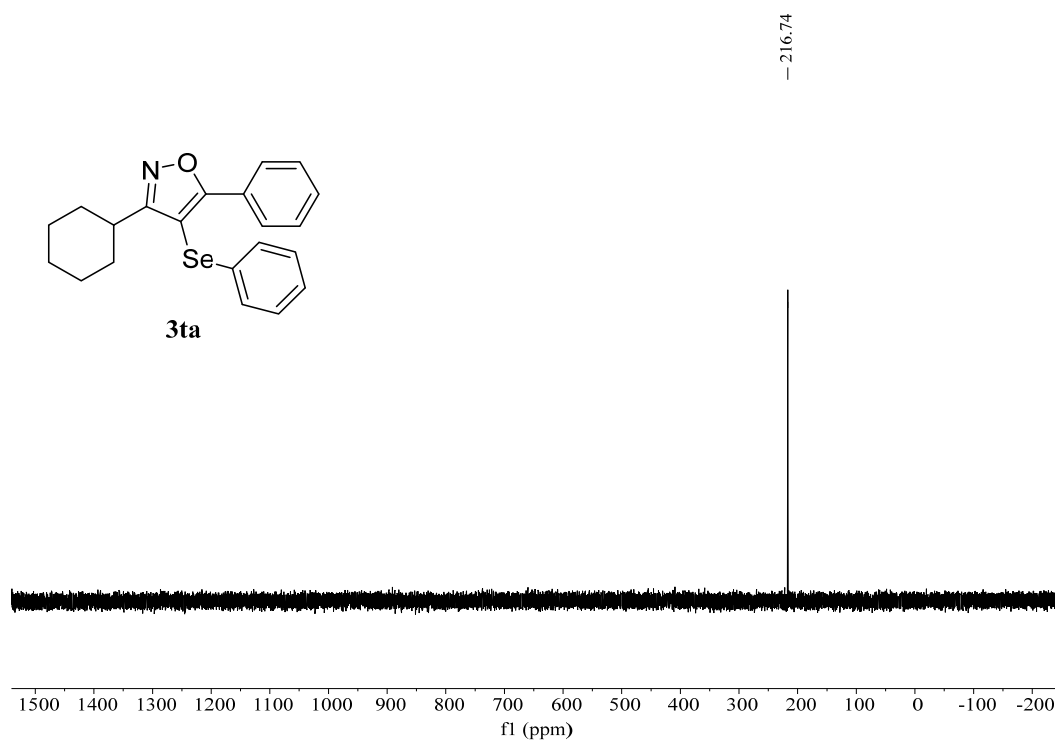

**Figure S130** <sup>77</sup>Se NMR (95.5 MHz) spectrum of **3ta** in CDCl<sub>3</sub>

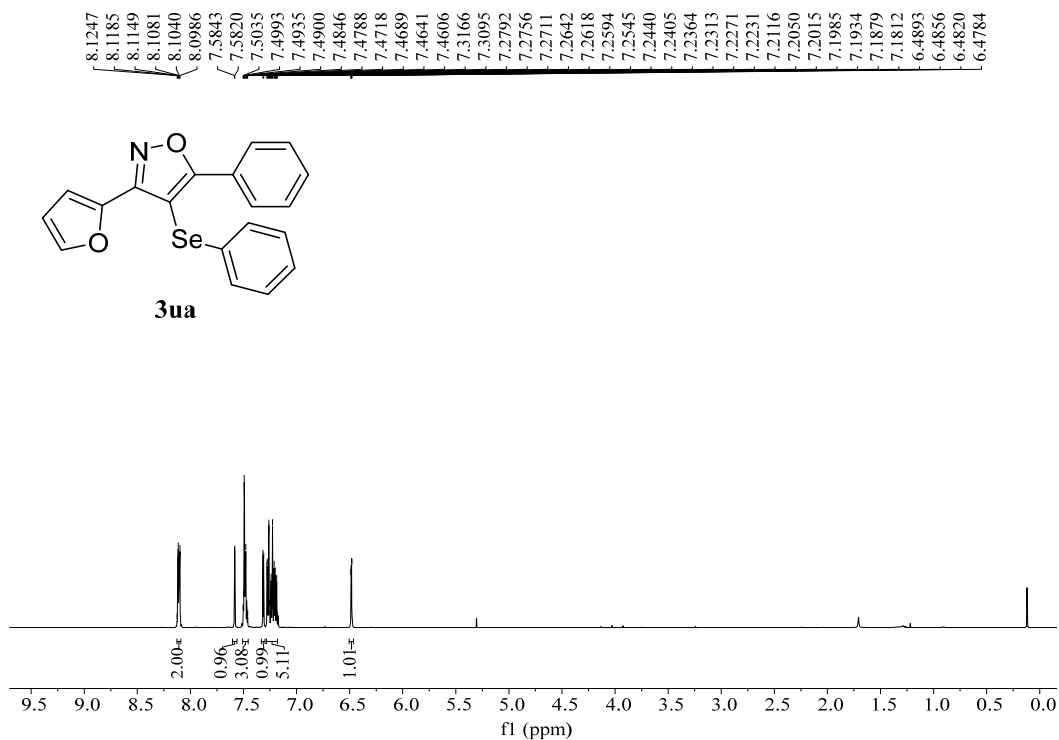

**Figure S131** <sup>1</sup>H NMR (500 MHz) spectrum of **3ua** in CDCl<sub>3</sub>

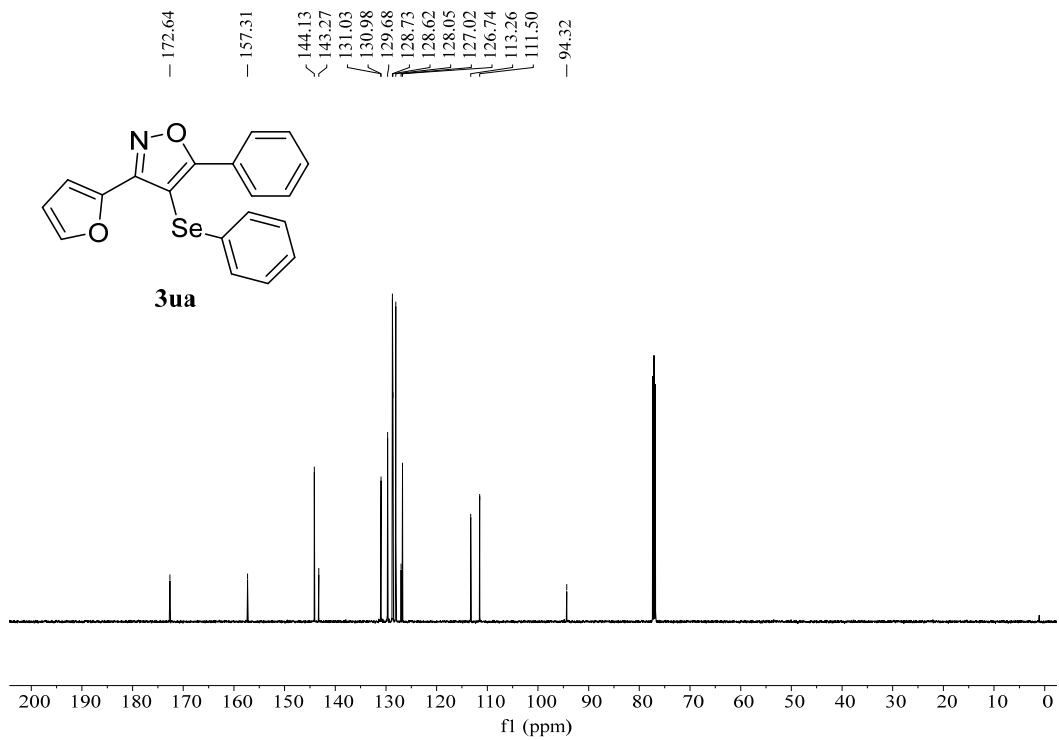

**Figure S132** <sup>13</sup>C NMR (125 MHz) spectrum of **3ua** in CDCl<sub>3</sub>



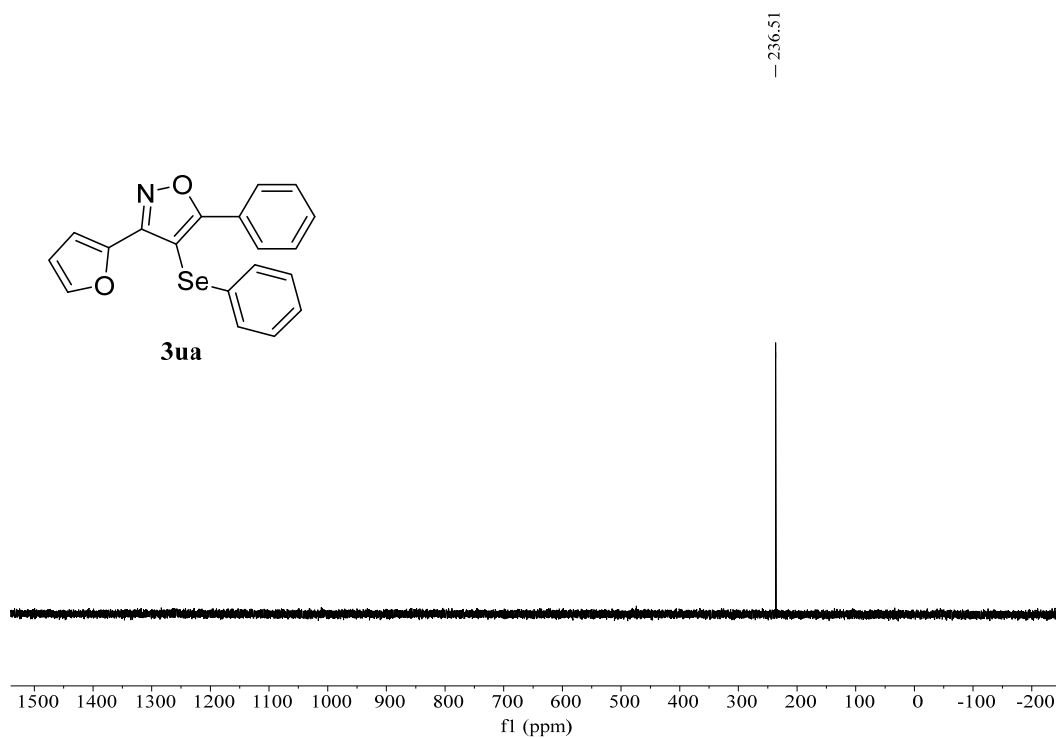

**Figure S133**  $^{77}\text{Se}$  NMR (95.5 MHz) spectrum of **3ua** in  $\text{CDCl}_3$

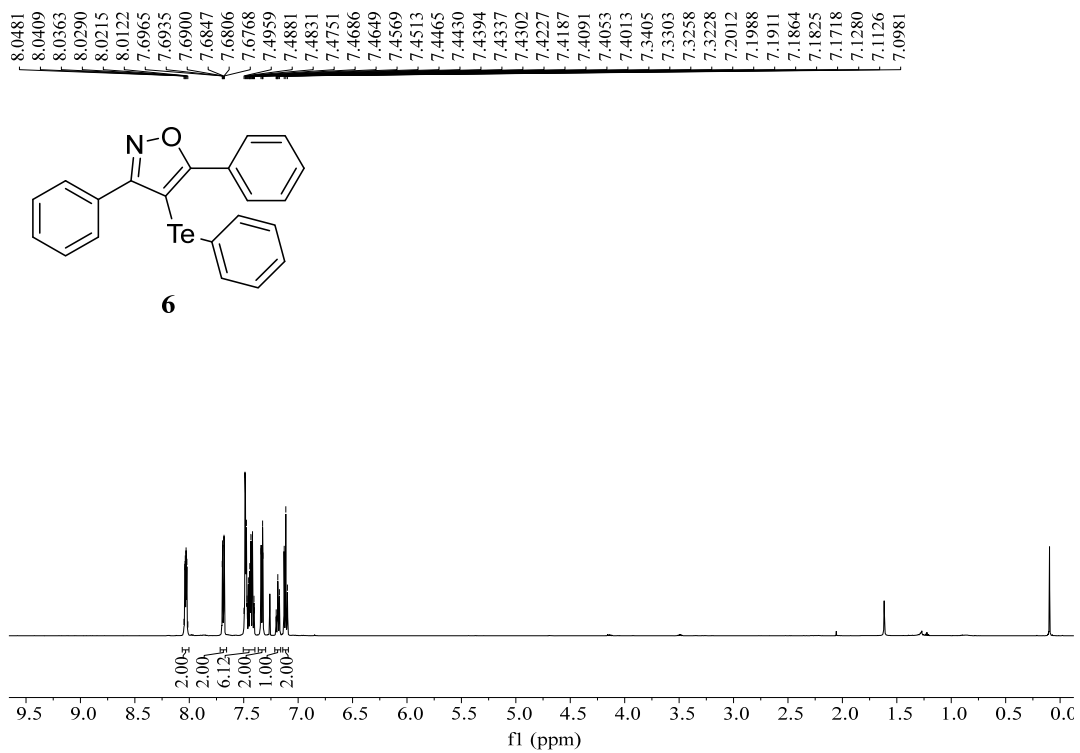

**Figure S134**  $^1\text{H}$  NMR (500 MHz) spectrum of **6** in  $\text{CDCl}_3$

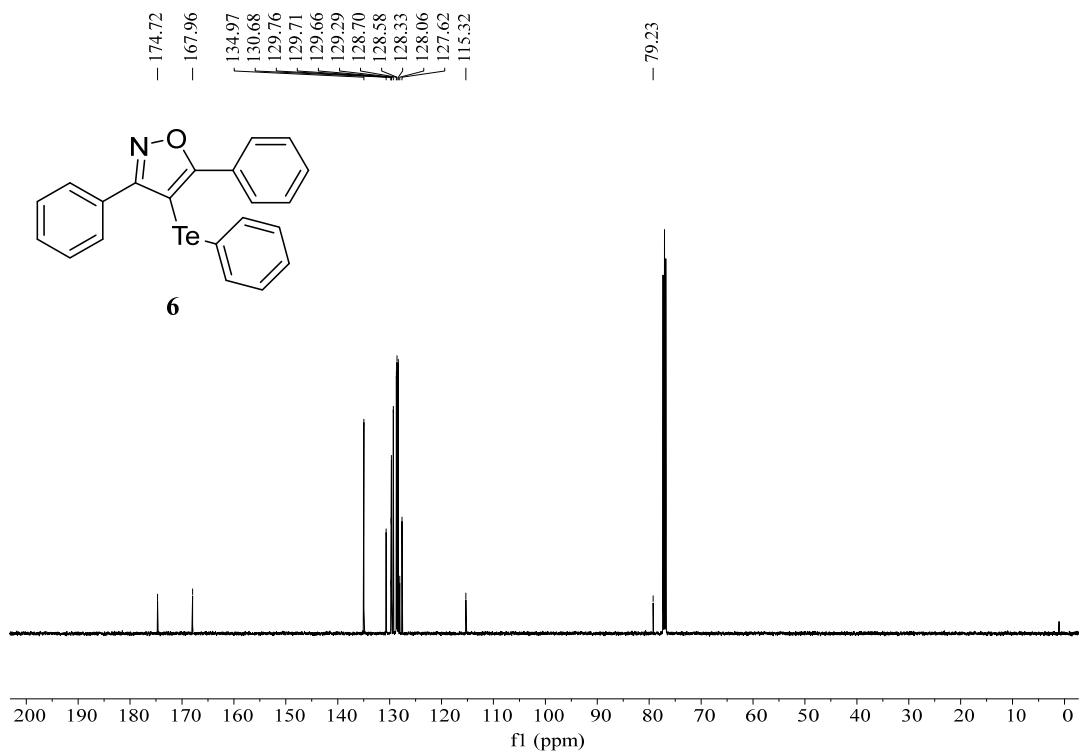

**Figure S135**  $^{13}\text{C}$  NMR (125 MHz) spectrum of **6** in  $\text{CDCl}_3$
